# Supplementary material for: Comorbidities and the use of comedications in people living with HIV on antiretroviral therapy in Japan: a cross-sectional study using a hospital claims database
Source: PubMed Central journal article supplement — BMJ Open. 2018 Jun 14;8(6):e019985. doi: 10.1136/bmjopen-2017-019985 (PMC6009456; doi:10.1136/bmjopen-2017-019985), 2018-06-14
Supplement: bmjopen-2017-019985.draft_revisions.pdf [file bmjopen-2017-019985.draft_revisions.pdf]

# BMJ Open

BMJ Open is committed to open peer review. As part of this commitment we make the peer review history of every article we publish publicly available.

When an article is published we post the peer reviewers' comments and the authors' responses online. We also post the versions of the paper that were used during peer review. These are the versions that the peer review comments apply to.

The versions of the paper that follow are the versions that were submitted during the peer review process. They are not the versions of record or the final published versions. They should not be cited or distributed as the published version of this manuscript.

BMJ Open is an open access journal and the full, final, typeset and author-corrected version of record of the manuscript is available on our site with no access controls, subscription charges or pay-per-view fees (<http://bmjopen.bmj.com>).

If you have any questions on BMJ Open's open peer review process please email [info.bmjopen@bmj.com](mailto:info.bmjopen@bmj.com)

# BMJ Open

## Chronic comorbidities and the use of co-medications in HIV-positive adults in Japan between 2010 and 2015: A cross-sectional study

|                                 |                                                                                                                                                                                                                               |
|---------------------------------|-------------------------------------------------------------------------------------------------------------------------------------------------------------------------------------------------------------------------------|
| Journal:                        | <i>BMJ Open</i>                                                                                                                                                                                                               |
| Manuscript ID                   | bmjopen-2017-019985                                                                                                                                                                                                           |
| Article Type:                   | Research                                                                                                                                                                                                                      |
| Date Submitted by the Author:   | 11-Oct-2017                                                                                                                                                                                                                   |
| Complete List of Authors:       | Ruzicka, Daniel; MSD K.K., Medical Affairs<br>Imai, Kentaro; MSD K.K., Oncology Clinical Development<br>Takahashi, Kenichi; MSD K.K., Japan Development<br>Naito, Toshio; Juntendo University, Department of General Medicine |
| <b>Primary Subject Heading</b>: | HIV/AIDS                                                                                                                                                                                                                      |
| Secondary Subject Heading:      | Infectious diseases                                                                                                                                                                                                           |
| Keywords:                       | INFECTIOUS DISEASES, HIV & AIDS < INFECTIOUS DISEASES, Epidemiology < INFECTIOUS DISEASES                                                                                                                                     |
|                                 |                                                                                                                                                                                                                               |

SCHOLARONE™  
Manuscripts

1  
2  
3  
4  
5  
6 [Title Page]  
7

8 **Title:**  
9

10  
11 **Chronic comorbidities and the use of co-medications in HIV-positive adults in**  
12  
13  
14 **Japan between 2010 and 2015: A cross-sectional study**  
15

16  
17  
18  
19  
20 **Authors and affiliations:**  
21

22 Daniel J. Ruzicka<sup>1</sup>; Kentaro Imai<sup>2</sup>; Kenichi Takahashi<sup>3</sup>; Toshio Naito<sup>4</sup>  
23  
24  
25

26  
27  
28 <sup>1</sup> Medical Affairs, MSD K.K., Tokyo, Japan  
29

30  
31 <sup>2</sup> Oncology Clinical Development, MSD K.K., Tokyo, Japan  
32

33  
34 <sup>3</sup> Japan Development, MSD K.K., Tokyo, Japan  
35

36  
37 <sup>4</sup>Department of General Medicine, Juntendo University, Tokyo, Japan  
38  
39  
40  
41

42 **Corresponding author:**  
43

44  
45 Daniel J. Ruzicka  
46

47  
48 Medical Affairs, MSD K.K.  
49

50  
51 Kitanomaru Square, 1-13-12 Kudan-kita, Chiyoda-ku, Tokyo 102-8667, Japan  
52

53  
54 Tel.: +81-3-6272-1681, E-mail: daniel.ruzicka@merck.com  
55  
56  
57  
58  
59  
60

1  
2  
3  
4  
5  
6  
7  
8  
9 **Word count: 3442 words**  
10  
11  
12  
13  
14  
15  
16  
17  
18  
19  
20  
21  
22  
23  
24  
25  
26  
27  
28  
29  
30  
31  
32  
33  
34  
35  
36  
37  
38  
39  
40  
41  
42  
43  
44  
45  
46  
47  
48  
49  
50  
51  
52  
53  
54  
55  
56  
57  
58  
59  
60

For peer review only

1  
2  
3  
4  
5  
6 **ABSTRACT** (242/300 words)  
7

8 **Objectives:** To investigate the prevalence of chronic comorbidities and the use of  
9  
10  
11 co-medications in Japanese HIV-positive patients aged  $\geq 18$  years.  
12

13  
14 **Design:** An observational, retrospective, cross-sectional study.  
15

16  
17 **Setting:** A medical claims database of Japanese hospitals.  
18

19  
20 **Participants:** A total of 1445 HIV-positive patients aged  $\geq 18$  years with a prescription  
21  
22 record of antiretrovirals between January 2010 and December 2015 were identified  
23  
24 from the database.  
25  
26

27  
28 **Outcome measures:** The number and types of chronic comorbidities as well as the  
29  
30 number and types of co-medications in different age groups of HIV-positive patients.  
31  
32

33  
34 **Results:** The median (range) age of the patients was 45 (18–90) years, and 90.4% of  
35  
36 patients were male. Of 1445 patients, 981 (67.9%) patients had at least one chronic  
37  
38 comorbidity. Common chronic comorbidities included lipid disorders (31.6%), diabetes  
39  
40 (26.8%), hypertension (18.2%), and hepatitis B/C co-infection (18.2%). Patients in the  
41  
42 older age groups had greater numbers of chronic comorbidities. The most common  
43  
44 chronic comorbidities in the older age groups were hypertension, diabetes, and lipid  
45  
46 disorders. The majority of patients used at least one co-medication, and patients in the  
47  
48 older age groups used greater numbers of co-medications. The most common  
49  
50  
51  
52  
53  
54  
55  
56  
57  
58  
59  
60

therapeutic category of co-medications included antacids, antiflatulents, and antiulcerants (31.7%). Of 148 malignancies reported in 116 patients, 81 were AIDS-defining cancers, and 67 were non-AIDS-defining cancers.

**Conclusions:** Chronic comorbidities and co-medications were more common in older Japanese HIV-positive patients, suggesting the need for special attention to the appropriate management of HIV and comorbidities in this patient population.

#### **Strengths and limitations of this study**

- This is the first study to examine the chronic comorbidities and co-medications in HIV-positive adults in Japan, using a large-scale medical claims database.
- Patients were stratified into small age groups, which provided a clear picture of patients' comorbidity and co-medication profiles by age.
- The cross-sectional study design did not allow inference of causality between HIV infection and chronic comorbidities or co-medications.
- This study has limitations inherent in the use of a medical claims database, such as poorly recorded or absent information, which may result in misclassification.
- The generalizability of the study results may be limited because data contained in the database were collected from the hospitals that can provide acute-care.

[Text]

## INTRODUCTION

Improvements in antiretroviral therapy (ART) over the last 15–20 years have prolonged the life expectancy of HIV-positive patients. It has been reported that the life expectancy of HIV-positive patients is now similar to that of HIV-negative individuals.[1] However, in addition to HIV-related conditions, age-associated chronic comorbidities negatively affect the mortality rates of HIV-positive patients, as shown in various international studies.[2-6] The increased number of chronic comorbidities in older HIV-positive patients is partly attributed to age-related changes in the physiological function and pharmacokinetics and/or pharmacodynamics of drugs.[7, 8] Other studies have suggested that a longer duration of ART, which leads to increased toxicity, and HIV-induced persistent immunodeficiency and inflammation might also contribute to the increased number of comorbidities or the higher prevalence of certain comorbidities in older HIV-positive patients.[9-12] It was also reported that chronic inflammation and immune system changes by HIV infection may be involved in the mechanisms for possible premature ageing in HIV-positive patients.[13]

Previous studies have shown that over 50% of HIV deaths are caused either by coinfection or age-associated non-infectious chronic comorbidities, including vascular

1  
2  
3  
4  
5  
6 diseases, hypertension, lipid disorders, diabetes mellitus, kidney diseases, malignancies,  
7  
8 and bone disorders.[14, 15] Such age-associated chronic comorbidities in HIV-positive  
9  
10 patients have presented a new challenge for HIV treatment, especially in an ageing  
11  
12 society such as Japan, which has the longest life expectancy worldwide.[16] In Japan,  
13  
14 more than 10% of newly diagnosed HIV-positive patients in 2015 were aged  $\geq 50$   
15  
16 years,[17] indicating that a number of HIV-positive patients are relatively older.  
17  
18  
19 Although the majority of newly diagnosed HIV-positive patients were aged 20–49 years  
20  
21 (88.2%),[17] these patients are also able to live to old age by appropriate management  
22  
23 with antiretrovirals; thus, in line with the trends in other countries, in which the  
24  
25 proportions of HIV-positive patients aged  $\geq 50$  years have increased,[18] the number of  
26  
27 older HIV-positive patients may also be increasing in Japan. Because of the potentially  
28  
29 long lifespans of HIV-positive patients in Japan, it is important to obtain real-world data  
30  
31 regarding the comorbidity profiles of the Japanese HIV-positive population.  
32  
33  
34  
35  
36  
37  
38  
39  
40  
41

42 Despite the importance of the association of chronic comorbidities with  
43  
44 mortality rates in HIV-positive patients, only a few small studies on chronic  
45  
46 comorbidities in Japanese HIV-positive patients have been published to date,[19, 20]  
47  
48 and there have been no large multi-centre epidemiological studies of chronic  
49  
50 comorbidities in HIV-positive patients in Japan. Therefore, we initiated a retrospective,  
51  
52  
53  
54  
55  
56  
57  
58  
59  
60



1  
2  
3  
4  
5  
6 cross-sectional study using a medical claims database to investigate 1) the frequency  
7  
8 and type of chronic comorbidities of interest and 2) the use of co-medications among  
9  
10  
11 HIV-positive patients aged  $\geq 18$  years in Japan. The patient profiles of chronic  
12  
13  
14 comorbidities and co-medications in different age groups should provide a better  
15  
16  
17 understanding of the characteristics of the Japanese HIV-positive population.  
18  
19  
20  
21

## 22 **METHODS**

### 23 **Study design**

24  
25  
26  
27  
28 This was an observational, retrospective, cross-sectional database study. Study  
29  
30  
31 data were extracted from a medical claims database of acute care hospitals in Japan,  
32  
33  
34 constructed by Medical Data Vision Co., Ltd. (MDV, Tokyo, Japan). This electronic  
35  
36  
37 record-based medical claims database contained information from approximately 17  
38  
39  
40 million patients in 288 hospitals (as of January 2017) in Japan  
41  
42  
43 ([https://www.mdv.co.jp/press/2017/detail\\_743.html](https://www.mdv.co.jp/press/2017/detail_743.html)). The data include approximately  
44  
45  
46 17% of all acute care hospitals in Japan that use the diagnosis procedure  
47  
48  
49 combination/per-diem payment system. The majority of patients in the database are  
50  
51  
52 aged 15–64 years (51.5%), followed by  $\geq 65$  years (34.2%) and 0–14 years (14.3%).  
53  
54  
55  
56  
57  
58  
59  
60

1  
2  
3  
4  
5  
6 Data included in the database were age, sex, department visited, date of medical service,  
7  
8 diagnosis codes, hospitalization, medical procedures, and prescriptions.  
9

### 10 11 12 13 14 **Study population** 15

16  
17 HIV-positive patients aged  $\geq 18$  years with a diagnosis record of HIV and with  
18  
19 a prescription record of antiretrovirals between January 2010 and December 2015  
20  
21 (study period) were enrolled in the study. All data of the HIV-positive patients during  
22  
23 the study period, including data prior to the diagnosis of HIV infection, were considered  
24  
25 as data pertaining to the HIV-positive patients and included in the analysis.  
26  
27  
28  
29

30  
31 HIV-positive patients in the database were identified by the presence of at least  
32  
33 one record of the International Classification of Diseases 10th Revision (ICD-10) codes  
34  
35 B20–24: HIV disease resulting in infectious and parasitic diseases (B20), malignant  
36  
37 neoplasms (B21), other specified diseases (B22), other conditions (B23), and  
38  
39 unspecified HIV disease (B24). To examine polypharmacy in HIV-positive patients that  
40  
41 could induce a potential drug-drug interaction (DDI) between antiretrovirals and  
42  
43 co-medications as well as to exclude doubtful HIV-positive patients, such as those  
44  
45 poorly recorded or intentionally recorded for the purpose of a claim, the patients were  
46  
47  
48  
49  
50  
51 required to have at least one prescription record of an antiretroviral. An antiretroviral  
52  
53  
54  
55  
56  
57  
58  
59  
60

1  
2  
3  
4  
5  
6 was defined as a prescription for any of the following antiretroviral drugs: nucleoside  
7  
8 reverse transcriptase inhibitors (NRTIs), non-nucleoside reverse transcriptase inhibitors  
9  
10  
11 (NNRTIs), protease inhibitors (PIs), integrase strand transfer inhibitors (INSTIs), and  
12  
13  
14 entry inhibitors.  
15

16  
17 The data of patients who met these criteria (n=1445) during the study period  
18  
19 were extracted from the database. The patients were grouped based on their age at the  
20  
21 time of their last hospital visit as follows: 18–29, 30–39, 40–49, 50–59, 60–69, and  $\geq 70$   
22  
23 years old.  
24  
25  
26  
27  
28  
29  
30

### 31 **Definitions of measures**

32  
33  
34 The following patient data during the study period were extracted from the  
35  
36 database: demographic characteristics (age, sex), diagnoses of AIDS-defining illnesses,  
37  
38 diagnoses of chronic comorbidities, prescriptions of antiretrovirals, and prescriptions of  
39  
40 co-medications. The AIDS-defining illnesses were identified using the ICD-10 codes  
41  
42 and disease names, which included the following: AIDS (B24); AIDS-related complex  
43  
44 (B24); HIV disease resulting in cytomegaloviral disease (B20.2), candidiasis (B20.4),  
45  
46 *Pneumocystis jirovecii* pneumonia (B20.6), Burkitt lymphoma (B21.1), and  
47  
48  
49  
50  
51  
52  
53  
54 encephalopathy (B22.0); Kaposi sarcoma (B21.0/C46.9); and non-Hodgkin lymphoma  
55  
56  
57  
58  
59  
60

1  
2  
3  
4  
5  
6 (B21.2/C82–85/C91.5).  
7

8  
9 The chronic comorbidities were defined based on the ICD-10 codes, and if the  
10  
11 code was recorded at least once during the study period, the patients were considered to  
12  
13 have that chronic comorbidity. All data of chronic comorbidities and co-medications  
14  
15 during the study period were included regardless of whether they were recorded before  
16  
17 or after the HIV infection, because it was considered from a clinical point of view that  
18  
19 the comorbidities developed before the HIV infection were persistent over the whole  
20  
21 study period. The chronic comorbidities in this study included type II diabetes (E11–14),  
22  
23 hypertension (I10–15, except for I11/I13), lipid disorders  
24  
25 (hypercholesterolaemia/hyperlipidaemia [E78.0–78.5]), vascular diseases (hypertensive  
26  
27 heart and renal diseases [I11/I13], angina pectoris [I20], myocardial infarction [I21–22],  
28  
29 stroke [I64]), kidney diseases (chronic renal failures [N18–19], urolithiasis [N20–21]),  
30  
31 malignancies (B21.0/B21.2/C00–97), psychiatric disorders (dementia [F01/F03],  
32  
33 psychosis [F20–29], mania and depression [F30–32], anxiety [F40–41], insomnia [F51]),  
34  
35 bone disorders (osteoporosis [M80–81]), and hepatitis B/C co-infection (B18). Among  
36  
37 malignancies, Kaposi sarcoma (B21.0/C46.9), non-Hodgkin lymphoma (B21.2/C82–  
38  
39 85/C91.5) and cervix uteri (C53.9) were defined as AIDS-defining cancers according to  
40  
41 the Shiels et al.'s study,[21] and all other malignancies were defined as  
42  
43  
44  
45  
46  
47  
48  
49  
50  
51  
52  
53  
54  
55  
56  
57  
58  
59  
60

1  
2  
3  
4  
5  
6 non-AIDS-defining cancers.  
7

8           The co-medication was defined as a non-antiretroviral medication prescribed  
9  
10  
11 for use for  $\geq 30$  days in total during the study period based on the therapeutic subgroups  
12  
13  
14 (2nd level) of the Anatomical Therapeutic Chemical (ATC) codes.  
15

### 16 17 18 19 20 **Ethical statement** 21

22           Because this was an observational study using de-identified claims data and the  
23  
24 Japanese Ethical Guidelines for Medical and Health Research Involving Human  
25  
26 Subjects do not apply to a study exclusively using de-identified data, the requirement  
27  
28 for informed consent was waived.  
29  
30  
31  
32  
33  
34  
35  
36

### 37 **Statistical Analysis** 38

39           Demographic data were summarized descriptively using the median and range  
40  
41 for continuous variables or the number and percentage (%) of patients for categorical  
42  
43 variables. Chronic comorbidities and co-medications were summarized descriptively by  
44  
45 age group. The 95% confidence intervals (CIs) were calculated using the exact binomial  
46  
47 method proposed by Clopper and Pearson.[22] All statistical analyses were performed  
48  
49  
50  
51 using SAS release 9.4 (SAS Institute Inc., Cary, NC, USA).  
52  
53  
54  
55  
56  
57  
58  
59  
60

## RESULTS

### Patient characteristics

The patient characteristics are shown in Table 1. Overall, 1445 HIV-positive patients enrolled from 47 hospitals were included in this study, with a median (range) age of 45 (18–90) years, and 90.4% were male. Of these patients, 703 (48.7%) had AIDS. The age and sex distribution of patients is shown in Figure 1. The majority of patients were aged 40–49 years, followed by 30–39, 50–59, 60–69, 18–29 and  $\geq 70$  years.

**Table 1. Demographic characteristics of HIV-positive patients (n=1445)**

|                             | Total<br>(n=1445) |
|-----------------------------|-------------------|
|                             | n (%)             |
| Age (years), median (range) | 45 (18–90)        |
| Male                        | 1306 (90.4)       |
| AIDS                        | 703 (48.7)        |
| Chronic comorbidity         |                   |
| Diabetes                    | 387 (26.8)        |
| Hypertension                | 263 (18.2)        |
| Lipid disorders             | 456 (31.6)        |
| Vascular diseases           | 62 (4.3)          |
| Kidney diseases             | 110 (7.6)         |
| Malignancies                | 116 (8.0)         |
| Psychiatric disorders       | 219 (15.2)        |

|                                          |             |
|------------------------------------------|-------------|
| Bone disorders                           | 85 (5.9)    |
| Hepatitis B/C co-infection               | 263 (18.2)  |
| Use of a non-antiretroviral medication * | 1086 (75.2) |
| Type of key drug among antiretrovirals   |             |
| INSTI                                    | 789 (54.8)  |
| NNRTI                                    | 359 (24.9)  |
| PI                                       | 617 (42.8)  |

\*A non-antiretroviral medication prescribed for use for  $\geq 30$  days in total during the study period was taken into consideration.

INSTI, integrase strand transfer inhibitor; NNRTI, non-nucleoside reverse transcriptase inhibitor; PI, protease inhibitor.

### Chronic comorbidities

Overall, 1961 chronic comorbidities were reported in 981 (67.9%)

HIV-positive patients, and 274 (19.0%) patients had three or more chronic

comorbidities. The most common chronic comorbidities were lipid disorders (31.6%;

95% CI, 29.2–34.0%), followed by diabetes (26.8%; 95% CI, 24.5–29.1%),

hypertension (18.2%; 95% CI, 16.2–20.3%), and hepatitis B/C co-infection (18.2%;

95% CI, 16.2–20.3%) (Table 1).

Figure 2A shows the number of chronic comorbidities by age. Although 57.0%

(57/100) of patients aged 18–29 years had no chronic comorbidity, the proportions of

patients with no chronic comorbidity decreased in the older age groups. More patients

in the older age groups had greater numbers of chronic comorbidities: 21.0% (65/309)

1  
2  
3  
4  
5  
6 of patients aged 30–39 years, 44.5% (114/256) of patients aged 50–59 years, and 70.7%  
7  
8 (58/82) of patients aged  $\geq 70$  years had two or more chronic comorbidities. No patients  
9  
10  
11 aged 18–29 years had four or more chronic comorbidities, while 25.6% (21/82) of  
12  
13  
14 patients aged  $\geq 70$  years had four or more chronic comorbidities.  
15  
16

17 Figure 2B shows the prevalence of different types of chronic comorbidities by  
18  
19 age group. The prevalence of most chronic comorbidities tended to be higher in the  
20  
21 older age groups, although the prevalence of psychiatric disorders and hepatitis B/C  
22  
23 co-infection was similar across all age groups (12.0–17.8% and 17.1–20.4%,  
24  
25 respectively). The most common chronic comorbidities in the older age groups were  
26  
27 hypertension, diabetes, and lipid disorders. Hypertension was the most common chronic  
28  
29 comorbidity in the  $\geq 70$ -year group (52.4%; 95% CI, 41.1–63.6%), diabetes in the 60–  
30  
31 69-year group (46.3%; 95% CI, 39.0–53.7%), and lipid disorders in the 50–59-year  
32  
33 group (35.9%; 95% CI, 30.1–42.1%). The prevalence of vascular diseases, kidney  
34  
35 diseases, malignancies, or bone disorders in the  $\geq 70$ -year group was 13.4–18.3%, which  
36  
37 was approximately 10–15% higher than its counterpart in the 18–29-year group (1.0–  
38  
39 4.0%).  
40  
41  
42  
43  
44  
45  
46  
47  
48  
49  
50  
51  
52  
53

## 54 **Co-medications**

55  
56  
57  
58  
59  
60



1  
2  
3  
4  
5  
6 Of 1445 HIV-positive patients, 1086 (75.2%) patients used at least one  
7  
8 co-medication and 342 (23.7%) patients used five or more co-medications, besides  
9  
10 antiretrovirals. Figure 3A shows the number of co-medications (excluding  
11  
12 antiretrovirals) by age group. The proportions of patients who used at least one  
13  
14 co-medication were 53.0% (53/100) in the 18–29-year group, 76.1% (388/510) in the  
15  
16 40–49-year group, and 86.6% (71/82) in the  $\geq 70$ -year group. More patients in the older  
17  
18 age groups used greater numbers of co-medications: 11.0% (34/309) of patients in the  
19  
20 30–39-year group, 29.3% (75/256) of patients in the 50–59-year group, and 47.6%  
21  
22 (39/82) in the  $\geq 70$ -year group used five or more co-medications.  
23  
24  
25  
26  
27  
28  
29  
30

31 The ten most common therapeutic categories were antacids, antiflatulents, and  
32  
33 antiulcerants (31.7%); systemic antibacterials (22.2%); psycholeptics (22.0%); systemic  
34  
35 antihistamines (18.5%); lipid-regulating/anti-atheroma preparations (17.2%);  
36  
37 anti-inflammatory and anti-rheumatic products (15.5%); antidiarrhoeals, oral electrolyte  
38  
39 replacers and intestinal anti-inflammatories (12.1%); agents acting on the  
40  
41 renin-angiotensin system (11.1%); vitamins (10.2%); and cough and cold preparations  
42  
43 (9.6%). For the top 5 common co-medications, the proportions of patients who took  
44  
45 respective co-medications by age group are shown in Figure 3B. Antacids, antiflatulents,  
46  
47 and antiulcerants were the most common in most of the age groups, especially in the  
48  
49  
50  
51  
52  
53  
54  
55  
56  
57  
58  
59  
60

1  
2  
3  
4  
5  
6  $\geq 70$ -year group (52.4%). The proportions of patients taking systemic antibacterials,

7  
8 psycholeptics, or systemic antihistamines were similar across all age groups.

9  
10  
11 Lipid-regulating agents were used more commonly in the older age groups, being used

12  
13  
14 in 25–30% of patients aged  $\geq 50$  years.

## 15 16 17 18 19 20 **Malignancies**

21  
22 In this study, 148 malignancies were reported in 116 HIV-positive patients,  
23  
24 including 81 AIDS-defining cancers and 67 non-AIDS-defining cancers. More than  
25  
26 two-thirds of non-AIDS-defining cancers (46 of 67) were observed in patients aged  $\geq 50$   
27  
28 years. Table 2 shows the proportions of patients who had cancers among these 116  
29  
30 patients with malignancies. For non-AIDS-defining cancers, the types of cancers that  
31  
32 were present in more than one patient are listed. Non-Hodgkin lymphoma was the most  
33  
34 common type of AIDS-defining cancer (54.3%), and bronchus or lung cancers were the  
35  
36 most common type of non-AIDS-defining cancers (6.9%).  
37  
38  
39  
40  
41  
42  
43  
44  
45  
46

47  
48 **Table 2. Proportions of patients with different types of AIDS-defining cancers and**  
49 **non-AIDS-defining cancers in HIV-positive patients with malignancies (n=116)**  
50

|  | Patients with malignancy<br>(n=116) |
|--|-------------------------------------|
|  | n (%)                               |
|  |                                     |

|    |                                                    |           |
|----|----------------------------------------------------|-----------|
| 1  |                                                    |           |
| 2  |                                                    |           |
| 3  |                                                    |           |
| 4  |                                                    |           |
| 5  | AIDS-defining cancer                               |           |
| 6  | Non-Hodgkin lymphoma                               | 63 (54.3) |
| 7  | Kaposi sarcoma                                     | 16 (13.8) |
| 8  | Cervix uteri                                       | 2 (1.7)   |
| 9  |                                                    |           |
| 10 |                                                    |           |
| 11 | Non-AIDS-defining cancer*                          |           |
| 12 | Bronchus or lung                                   | 8 (6.9)   |
| 13 | Secondary malignant neoplasm of bone and bone      |           |
| 14 | marrow                                             | 6 (5.2)   |
| 15 | Colon                                              | 3 (2.6)   |
| 16 | Breast                                             | 3 (2.6)   |
| 17 | Malignant neoplasm, without specification of site  | 3 (2.6)   |
| 18 | Secondary malignant neoplasm of brain and cerebral |           |
| 19 | meninges                                           | 3 (2.6)   |
| 20 | Acute myeloblastic leukaemia (AML)                 | 3 (2.6)   |
| 21 | Multiple myeloma                                   | 3 (2.6)   |
| 22 | Stomach                                            | 2 (1.7)   |
| 23 | Secondary malignant neoplasm of lung               | 2 (1.7)   |
| 24 | Liver cell carcinoma                               | 2 (1.7)   |
| 25 | Sigmoid colon                                      | 2 (1.7)   |
| 26 | Thoracic part of oesophagus                        | 2 (1.7)   |
| 27 | Skin of trunk                                      | 2 (1.7)   |
| 28 |                                                    |           |
| 29 |                                                    |           |
| 30 |                                                    |           |
| 31 |                                                    |           |
| 32 |                                                    |           |
| 33 |                                                    |           |
| 34 |                                                    |           |

\*Non-AIDS-defining cancers that were present in more than one patient are listed.

## DISCUSSION

This study quantified the prevalence of chronic comorbidities in different age groups of HIV-positive patients aged  $\geq 18$  years in Japan to understand the characteristics of an HIV-positive adult population in Japan. To date, no large-scale studies have described chronic comorbidities in HIV-positive patients in Japan. This

1  
2  
3  
4  
5  
6 study found that chronic comorbidities were common in the Japanese HIV-positive  
7  
8 population and that older patients had greater numbers of chronic comorbidities  
9  
10  
11 compared with younger patients.  
12  
13

14 Previous international studies reported greater numbers of comorbidities in  
15  
16 older HIV-positive patients,[23-25] similar to the findings of the current study. For  
17  
18 types of comorbidities, older HIV-positive patients in Switzerland and the US were  
19  
20 more likely to have diabetes mellitus, cardiovascular diseases, non-AIDS-defining  
21  
22 malignancies, osteoporosis, or liver diseases than younger patients.[23, 24] Similar to  
23  
24 these studies, diabetes mellitus, vascular diseases, and bone disorders were more  
25  
26 common in older HIV-positive patients in this study. In addition, kidney diseases were  
27  
28 more common in older patients, as suggested by a previous study reporting that both  
29  
30 HIV infection and increased age are associated with an increased risk of kidney diseases  
31  
32 in HIV-positive patients.[26]  
33  
34  
35  
36  
37  
38  
39  
40  
41

42 In North America, AIDS-defining cancers remain a great concern in  
43  
44 HIV-positive patients, and the cumulative incidence by age 75 years was reported to be  
45  
46 4.1% for Kaposi sarcoma and 4.0% for non-Hodgkin lymphoma in 2005–2009,[27]  
47  
48 although previous studies have reported that the incidence of non-Hodgkin lymphoma  
49  
50  
51 and Kaposi sarcoma in HIV-positive patients has decreased by antiretrovirals.[21, 28] In  
52  
53  
54  
55  
56  
57  
58  
59  
60

1  
2  
3  
4  
5  
6 the current study, these cancers were not commonly observed (non-Hodgkin lymphoma,  
7  
8 4.4% [63/1445]; Kaposi sarcoma, 1.1% [16/1445]), and the prevalence was much lower  
9  
10  
11 than that reported in a previous Japanese study in which non-Hodgkin lymphoma and  
12  
13  
14 Kaposi sarcoma were present in 37.9% and 15.2%, respectively, of autopsied  
15  
16  
17 HIV-positive patients with an experience of antiretrovirals from 1985–2012.[29] This  
18  
19  
20 difference may be attributed to the different study populations. Autopsied patients are  
21  
22  
23 likely examined in more detail because they might be sicker than this study population,  
24  
25  
26 considering that an autopsy is conducted in many cases when the cause of death is  
27  
28  
29 unknown. Another reason for the difference in findings may be that this study  
30  
31  
32 population represents HIV-positive patients in the current antiretroviral era, when the  
33  
34  
35 improvement of HIV management by antiretrovirals has improved their immune  
36  
37  
38 function.

39  
40 In this study, non-AIDS-defining cancers accounted for 45% of all  
41  
42 malignancies, and more than two-thirds of non-AIDS-defining cancers were observed in  
43  
44  
45 patients aged  $\geq 50$  years. A previous study showed that age-related cancers, such as lung,  
46  
47  
48 prostate, colorectal, and breast cancers, were common in older HIV-positive  
49  
50  
51 patients.[30] Another study also reported an increase in non-AIDS-defining cancers  
52  
53  
54 among the HIV-positive population as a consequence of the ageing of the AIDS  
55  
56  
57  
58  
59  
60

1  
2  
3  
4  
5  
6 population.[21] In light of these previous findings, our results highlight the importance  
7  
8 of non-AIDS-defining cancers among HIV-positive patients because of their extended  
9  
10 lifespans. The risks for several types of non-AIDS-defining cancers (e.g., Hodgkin  
11  
12 lymphoma, and anal, vaginal, liver, and lung cancers) were even higher in HIV-positive  
13  
14 patients than in the general population,[28] which may further increase the importance  
15  
16 of these cancers in older HIV-positive patients. However, because of the small number  
17  
18 of patients with malignancies in the current study, it was difficult to illuminate any  
19  
20 trends in the prevalence of malignancies by age group. Thus, the prevalence of  
21  
22 malignancies by age and cancer type should be interpreted carefully and further  
23  
24 examined in future studies.  
25  
26  
27  
28  
29  
30  
31  
32  
33

34 Several international studies reported an increased risk of age-associated  
35  
36 comorbidities in HIV-positive patients compared with the general population or the  
37  
38 HIV-negative population.[25, 31, 32] These studies showed that HIV-positive patients  
39  
40 had a greater number of age-associated comorbidities at earlier ages than the  
41  
42 HIV-negative population, suggesting premature ageing in HIV-positive patients.[25, 32]  
43  
44  
45 Future research is being planned to determine whether our study population has more  
46  
47  
48 chronic comorbidities at earlier ages compared to HIV-negative populations.  
49  
50  
51  
52  
53  
54  
55  
56  
57  
58  
59  
60

1  
2  
3  
4  
5  
6 Our findings that older HIV-positive patients had greater numbers of chronic  
7  
8 comorbidities indicate an increased need for co-medications to treat these comorbidities.  
9  
10  
11 This indication was confirmed by results showing that more co-medications were used  
12  
13  
14 among older HIV-positive patients. Similar trends were observed in a previous study  
15  
16  
17 showing that 32% of patients aged <50 years and 54% of patients aged  $\geq$ 50 years used  
18  
19  
20 five or more co-medications,[33] although the corresponding proportions were smaller  
21  
22  
23 in the current study (18.0% in patients aged <50 years and 33.7% in patients aged  $\geq$ 50  
24  
25  
26 years). The results suggest that the management of HIV and comorbidities in older  
27  
28  
29 HIV-positive patients may be complicated because of DDIs. Indeed, several  
30  
31  
32 international studies reported an increased potential for DDIs in older HIV-positive  
33  
34  
35 patients because of increased use of co-medications.[34-37] Moreover, our study  
36  
37  
38 showed that the use of co-medications was common even in younger HIV-positive  
39  
40  
41 patients and that over half of patients aged 18–29 years used at least one co-medication.  
42  
43  
44 In light of this finding, our results suggest the importance of potential DDIs not only in  
45  
46  
47 the older HIV-positive patients but also in the younger HIV-positive patients in Japan.

48  
49 It was reported that expected DDIs in HIV-positive patients were mostly  
50  
51  
52 between PIs or NNRTIs and co-medications, such as cardiovascular agents, anti-platelet  
53  
54  
55 agents, psychotropics, antidepressants, analgesics, and methadone.[34, 35] In the  
56  
57  
58  
59  
60

1  
2  
3  
4  
5  
6 current study, lipid-regulating agents and agents acting on the renin-angiotensin system  
7  
8  
9 were commonly used in HIV-positive patients, probably reflecting the high prevalence  
10  
11 of lipid disorders and hypertension, especially in older patients. Although the  
12  
13 mechanisms underlying lipid disorders in HIV-positive patients are complex, ART  
14  
15 might be partly responsible for the occurrences of lipid disorders because certain types  
16  
17 of antiretrovirals (e.g., NNRTIs and PIs) can be associated with changes in lipid  
18  
19 metabolism.[38, 39] Psycholeptics were also commonly used in HIV-positive patients,  
20  
21 regardless of age, which was consistent with previous studies.[34, 35] It was reported  
22  
23 that psychiatric disorders are common in HIV-positive patients and that HIV disease  
24  
25 progression and treatment with antiretrovirals are associated with psychiatric  
26  
27 disorders.[40, 41] Antacids, antiflatulents, and antiulcerants were the most common  
28  
29 co-medications in this study (31.7%). The proportion was much higher compared to a  
30  
31 Swiss study reporting that gastrointestinal drugs were used in 11% of patients treated  
32  
33 with antiretrovirals.[42] The common use of antacids in the current study may be related  
34  
35 to the high prevalence of gastric ulcers in the Japanese population: it was reported that  
36  
37 gastric ulcers were present in 27% of hospitalized Japanese patients aged  $\geq 65$  years and  
38  
39 that peptic ulcer remedies were the second most common therapeutic category (11.2%)  
40  
41 of all drugs prescribed.[43] Because antacids can reduce serum concentrations of  
42  
43  
44  
45  
46  
47  
48  
49  
50  
51  
52  
53  
54  
55  
56  
57  
58  
59  
60



1  
2  
3  
4  
5  
6 several antiretrovirals by altering the acid environment necessary for the optimal  
7  
8 absorption of certain drugs,[44, 45] Japanese physicians may need to pay careful  
9  
10 attention when prescribing antiretrovirals to patients using these drugs.  
11  
12  
13  
14  
15

### 16 17 **Limitation**

18  
19 This study has some limitations. Because this was a cross-sectional study,  
20  
21 chronic comorbidities/co-medications were not examined against the timing of a  
22  
23 diagnosis of HIV infection. It should be noted that chronic  
24  
25 comorbidities/co-medications in this study included those coded before a diagnosis of  
26  
27 HIV infection. This study is limited in its ability to draw valid conclusions about  
28  
29 possible causality between HIV infection and chronic comorbidities/co-medications, so  
30  
31 causality should always be confirmed by more rigorous studies. Other limitations  
32  
33 include those that are inherent to observational studies using a medical claims database,  
34  
35 such as poorly recorded or absent information, which may result in misclassification.  
36  
37 For example, because the database is hospital-based, medical/treatment history recorded  
38  
39 at different hospitals could not be obtained, meaning that patients may have received  
40  
41 co-medications for other diseases at different hospitals. Additionally, the study results  
42  
43 may not be generalizable to the overall HIV-positive patient population in Japan,  
44  
45  
46  
47  
48  
49  
50  
51  
52  
53  
54  
55  
56  
57  
58  
59  
60

1  
2  
3  
4  
5  
6 because patients in this database of acute-care hospitals might be more ill than other  
7  
8 HIV-positive patients treated at non-acute care hospitals; HIV treatment choices in the  
9  
10 acute care hospitals may not be representative of those made in non-acute care  
11  
12 hospitals; and this study excluded patients without a record of antiretrovirals who  
13  
14 represent HIV-positive patients not taking antiretrovirals. Finally, because detailed data  
15  
16 regarding HIV infection status were not available, we could not analyse the potential  
17  
18 relationships between chronic comorbidities and CD4 count, HIV-RNA, or ART  
19  
20 duration.  
21  
22  
23  
24  
25  
26  
27  
28  
29  
30

## 31 **Conclusions**

32  
33  
34 In conclusion, the results of this study demonstrated that chronic comorbidities  
35  
36 and co-medications were more common in older HIV-positive patients in Japan,  
37  
38 suggesting the need for special treatment and attention by physicians. The application of  
39  
40 our results can support the development of optimal healthcare strategies for this  
41  
42 growing population.  
43  
44  
45  
46  
47  
48  
49  
50  
51  
52  
53  
54  
55  
56  
57  
58  
59  
60

## **Acknowledgments**

Medical writing and statistical supports were provided by Clinical Study Support, Inc.

## **Author contributions**

DJR contributed to the study design. DJR, KI, and KT contributed to the data analysis and interpretation. DJR, KI, KT, and TN revised the manuscript draft critically and approved the final version of the manuscript to be published.

## **Funding statement**

This study was supported by MSD K.K., Tokyo, Japan.

## **Competing interests statement**

DJR, KI, and KT are employees of MSD K.K., Tokyo, Japan. TN has received no funding for this study but received lecture fees from MSD K.K., Tokyo, Japan.

## **Data sharing statement**

No additional data are available.

## REFERENCES

1. Nakagawa F, May M, Phillips A. Life expectancy living with HIV: recent estimates and future implications. *Curr Opin Infect Dis* 2013;26:17–25.
2. Guaraldi G, Orlando G, Zona S, et al. Premature age-related comorbidities among HIV-infected persons compared with the general population. *Clin Infect Dis* 2011;53:1120–6.
3. Hasse B, Ledergerber B, Furrer H, et al. Morbidity and aging in HIV-infected persons: the Swiss HIV cohort study. *Clin Infect Dis* 2011;53:1130–9.
4. Wu PY, Chen MY, Hsieh SM, et al. Comorbidities among the HIV-infected patients aged 40 years or older in Taiwan. *PLOS ONE* 2014;9:e104945.
5. Vance DE, Mugavero M, Willig J, et al. Aging with HIV: a cross-sectional study of comorbidity prevalence and clinical characteristics across decades of life. *J Assoc Nurses AIDS Care* 2011;22:17–25.
6. Schouten J, Wit FW, Stolte IG, et al. Cross-sectional comparison of the prevalence of age-associated comorbidities and their risk factors between HIV-infected and uninfected individuals: the AGEhIV cohort study. *Clin Infect Dis* 2014;59:1787–97.

- 1  
2  
3  
4  
5  
6 7. Mangoni AA, Jackson SH. Age-related changes in pharmacokinetics and  
7  
8 pharmacodynamics: basic principles and practical applications. *Br J Clin*  
9  
10  
11 *Pharmacol* 2004;57:6–14.
- 12  
13  
14 8. Sotaniemi EA, Arranto AJ, Pelkonen O, et al. Age and cytochrome P450-linked  
15  
16 drug metabolism in humans: an analysis of 226 subjects with equal histopathologic  
17  
18 conditions. *Clin Pharmacol Ther* 1997;61:331–9.
- 19  
20  
21 9. Edelman EJ, Gordon KS, Glover J, et al. The next therapeutic challenge in HIV:  
22  
23 polypharmacy. *Drugs Aging* 2013;30:613–28.
- 24  
25  
26  
27  
28 10. Seaberg EC, Muñoz A, Lu M, et al. Association between highly active  
29  
30 antiretroviral therapy and hypertension in a large cohort of men followed from 1984  
31  
32 to 2003. *AIDS* 2005;19:953–60.
- 33  
34  
35  
36  
37 11. Deeks SG, Phillips AN. HIV infection, antiretroviral treatment, ageing, and  
38  
39 non-AIDS related morbidity. *BMJ* 2009;338:a3172.
- 40  
41  
42  
43 12. Deeks SG. HIV infection, inflammation, immunosenescence, and aging. *Annu Rev*  
44  
45 *Med* 2011;62:141–55.
- 46  
47  
48 13. Wing EJ. HIV and aging. *Int J Infect Dis* 2016;53:61–8.
- 49  
50  
51  
52  
53  
54  
55  
56  
57  
58  
59

- 1  
2  
3  
4  
5  
6 14. Weber R, Sabin CA, Friis-Møller N, et al. Liver-related deaths in persons infected  
7  
8 with the human immunodeficiency virus: the D:A:D study. *Arch Intern Med*  
9  
10 2006;166:1632–41.  
11  
12  
13  
14 15. Sackoff JE, Hanna DB, Pfeiffer MR, et al. Causes of death among persons with  
15  
16 AIDS in the era of highly active antiretroviral therapy: New York City. *Ann Intern*  
17  
18 *Med* 2006;145:397–406.  
19  
20  
21  
22  
23 16. Global Health Observatory (GHO) Data. World Health Organization (2016).  
24  
25 [http://www.who.int/gho/publications/world\\_health\\_statistics/2016/en/](http://www.who.int/gho/publications/world_health_statistics/2016/en/) (accessed 19  
26  
27 Mar 2017).  
28  
29  
30  
31 17. Trends in AIDS occurrence report (2015). In Japanese.  
32  
33 [http://api-net.jfap.or.jp/status/2015/15nenpo/15nenpo\\_menu.html](http://api-net.jfap.or.jp/status/2015/15nenpo/15nenpo_menu.html) (Accessed 19  
34  
35 Mar 2017).  
36  
37  
38  
39 18. Costagliola D. Demographics of HIV and aging. *Curr Opin HIV AIDS* 2014;9:294–  
40  
41 301.  
42  
43  
44  
45 19. Yanagimoto S, Yotsuyanagi H, Kikuchi Y, et al. Chronic hepatitis B in patients  
46  
47 coinfecting with human immunodeficiency virus in Japan: a retrospective  
48  
49 multicenter analysis. *J Infect Chemother* 2012;18:883–90.  
50  
51  
52  
53  
54  
55  
56  
57  
58  
59  
60

- 1  
2  
3  
4  
5  
6 20. Yanagisawa N, Ando M, Ajisawa A, et al. Clinical characteristics of kidney disease  
7  
8 in Japanese HIV-infected patients. *Nephron Clin Pract* 2011;118:c285–91.  
9  
10  
11 21. Shiels MS, Pfeiffer RM, Gail MH, et al. Cancer burden in the HIV-infected  
12  
13 population in the United States. *J Natl Cancer Inst* 2011;103:753–62.  
14  
15  
16 22. Clopper CJ, Pearson ES. The use of confidence or fiducial limits illustrated in the  
17  
18 case of the binomial. *Biometrika* 1934;26:404–13.  
19  
20  
21 23. Hasse B, Ledergerber B, Furrer H, et al. Morbidity and aging in HIV-infected  
22  
23 persons: the Swiss HIV cohort study. *Clin Infect Dis* 2011;53:1130–9.  
24  
25  
26  
27 24. Goulet JL, Fultz SL, Rimland D, et al. Aging and infectious diseases: do patterns of  
28  
29 comorbidity vary by HIV status, age, and HIV severity? *Clin Infect Dis*  
30  
31 2007;45:1593–601.  
32  
33  
34  
35 25. Guaraldi G, Orlando G, Zona S, et al. Premature age-related comorbidities among  
36  
37 HIV-infected persons compared with the general population. *Clin Infect Dis*  
38  
39 2011;53:1120–6.  
40  
41  
42  
43  
44 26. Hirschhorn LR, Kaaya SF, Garrity PS, et al. Cancer and the 'other'  
45  
46 noncommunicable chronic diseases in older people living with HIV/AIDS in  
47  
48 resource-limited settings: a challenge to success. *AIDS* 2012;26(Suppl 1):S65–S75.  
49  
50  
51  
52  
53  
54  
55  
56  
57  
58  
59  
60

- 1  
2  
3  
4  
5  
6 27. Silverberg MJ, Lau B, Achenbach CJ, et al. Cumulative Incidence of Cancer  
7  
8 Among Persons With HIV in North America: A Cohort Study. *Ann Intern Med*  
9  
10  
11 2015;163:507–18.  
12  
13  
14 28. Patel P, Hanson DL, Sullivan PS, et al. Incidence of types of cancer among  
15  
16 HIV-infected persons compared with the general population in the United States,  
17  
18 1992-2003. *Ann Intern Med* 2008;148:728–36.  
19  
20  
21  
22 29. Katano H, Hishima T, Mochizuki M, et al. The prevalence of opportunistic  
23  
24 infections and malignancies in autopsied patients with human immunodeficiency  
25  
26 virus infection in Japan. *BMC Infect Dis* 2014;14:229.  
27  
28  
29  
30  
31 30. Yanik EL, Katki HA, Engels EA. Cancer risk among the HIV-infected elderly in  
32  
33 the United States. *AIDS* 2016;30:1663–8.  
34  
35  
36  
37 31. Hernandez-Romieu AC, Garg S, Rosenberg ES, et al. Is diabetes prevalence higher  
38  
39 among HIV-infected individuals compared with the general population? Evidence  
40  
41 from MMP and NHANES 2009-2010. *BMJ Open Diabetes Res Care*  
42  
43 2017;5:e000304.  
44  
45  
46  
47  
48 32. Schouten J, Wit FW, Stolte IG, et al. Cross-sectional comparison of the prevalence  
49  
50 of age-associated comorbidities and their risk factors between HIV-infected and  
51  
52  
53  
54  
55  
56  
57  
58  
59  
60



- 1  
2  
3  
4  
5  
6 uninfected individuals: the AGEHIV cohort study. *Clin Infect Dis* 2014;59:1787–  
7  
8 97.  
9  
10  
11 33. Holtzman C, Armon C, Tedaldi E, et al. Polypharmacy and risk of antiretroviral  
12  
13 drug interactions among the aging HIV-infected population. *J Gen Intern Med*  
14  
15 2013;28:1302–10.  
16  
17  
18  
19 34. Tseng A, Szadkowski L, Walmsley S, et al. Association of age with polypharmacy  
20  
21 and risk of drug interactions with antiretroviral medications in HIV-positive  
22  
23 patients. *Ann Pharmacother* 2013;47:1429–39.  
24  
25  
26  
27  
28 35. Marzolini C, Back D, Weber R, et al. Ageing with HIV: medication use and risk for  
29  
30 potential drug-drug interactions. *J Antimicrob Chemother* 2011;66:2107–11.  
31  
32  
33  
34 36. Greene M, Steinman MA, McNicholl IR, et al. Polypharmacy, drug-drug  
35  
36 interactions, and potentially inappropriate medications in older adults with human  
37  
38 immunodeficiency virus infection. *J Am Geriatr Soc* 2014;62:447–53.  
39  
40  
41  
42 37. Rasmussen LD, Kronborg G, Larsen CS, et al. Use of non-antiretroviral drugs  
43  
44 among individuals with and without HIV-infection: a Danish nationwide study.  
45  
46  
47  
48 *Infect Dis (Lond)* 2017;49:42–54.  
49  
50  
51  
52  
53  
54  
55  
56  
57  
58  
59  
60

- 1  
2  
3  
4  
5  
6 38. da Cunha J, Maselli LM, Stern AC, et al. Impact of antiretroviral therapy on lipid  
7  
8 metabolism of human immunodeficiency virus-infected patients: Old and new  
9  
10  
11 drugs. *World J Virol* 2015;4:56–77.  
12  
13  
14 39. Lake JE, Currier JS. Metabolic disease in HIV infection. *Lancet Infect Dis*  
15  
16 2013;13:964–75.  
17  
18  
19 40. Brogan K, Lux J. Management of common psychiatric conditions in the  
20  
21 HIV-positive population. *Curr HIV/AIDS Rep* 2009;6:108–15.  
22  
23  
24 41. Watkins CC, Treisman GJ. Neuropsychiatric complications of aging with HIV. *J*  
25  
26 *Neurovirol* 2012;18:277–90.  
27  
28  
29  
30 42. Marzolini C, Elzi L, Gibbons S, et al. Prevalence of comedications and effect of  
31  
32 potential drug-drug interactions in the Swiss HIV Cohort Study. *Antivir Ther*  
33  
34 2010;15:413–23.  
35  
36  
37  
38 43. Mizokami F, Koide Y, Noro T, et al. Polypharmacy with common diseases in  
39  
40 hospitalized elderly patients. *Am J Geriatr Pharmacother* 2012;10:123–8.  
41  
42  
43  
44 44. de Maat MM, Ekhardt GC, Huitema AD, et al. Drug interactions between  
45  
46 antiretroviral drugs and comedicated agents. *Clin Pharmacokinet* 2003;42:223–82.  
47  
48  
49  
50  
51  
52  
53  
54  
55  
56  
57  
58  
59  
60

- 1  
2  
3  
4  
5  
6 45. Nachega JB, Hsu AJ, Uthman OA, et al. Antiretroviral therapy adherence and  
7  
8 drug-drug interactions in the aging HIV population. *AIDS* 2012;26(Suppl 1):S39–  
9  
10  
11 S53.  
12  
13  
14  
15  
16  
17  
18  
19  
20  
21  
22  
23  
24  
25  
26  
27  
28  
29  
30  
31  
32  
33  
34  
35  
36  
37  
38  
39  
40  
41  
42  
43  
44  
45  
46  
47  
48  
49  
50  
51  
52  
53  
54  
55  
56  
57  
58  
59  
60

1  
2  
3  
4  
5  
6 [Figure legends]  
7

8 **Figure 1. Age and sex distribution of HIV-positive patients (n=1445)**  
9

10  
11  
12 **Figure 2. Number and type of chronic comorbidities by age group**  
13

14  
15  
16  
17 **Figure 3. Number and type of co-medications prescribed by age group.** Figure 3B  
18

19 shows the top 5 common co-medications in this study.  
20  
21  
22  
23  
24  
25  
26  
27  
28  
29  
30  
31  
32  
33  
34  
35  
36  
37  
38  
39  
40  
41  
42  
43  
44  
45  
46  
47  
48  
49  
50  
51  
52  
53  
54  
55  
56  
57  
58  
59  
60

1  
2  
3  
4  
5  
6  
7  
8  
9  
10  
11  
12  
13  
14  
15  
16  
17  
18  
19  
20  
21  
22  
23  
24  
25  
26  
27  
28  
29  
30  
31  
32  
33  
34  
35  
36  
37  
38  
39  
40  
41  
42  
43  
44  
45  
46  
47  
48  
49  
50  
51  
52  
53  
54  
55  
56  
57  
58  
59  
60

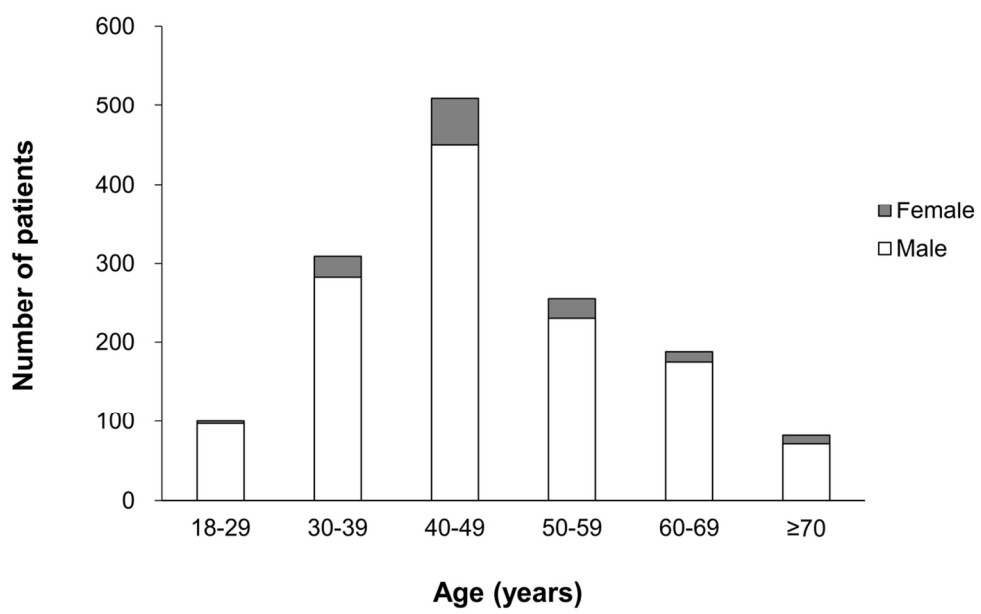

Age and sex distribution of studied patients living with HIV (n=1445)

111x69mm (300 x 300 DPI)

Review only

A) Number of chronic comorbidities by age group

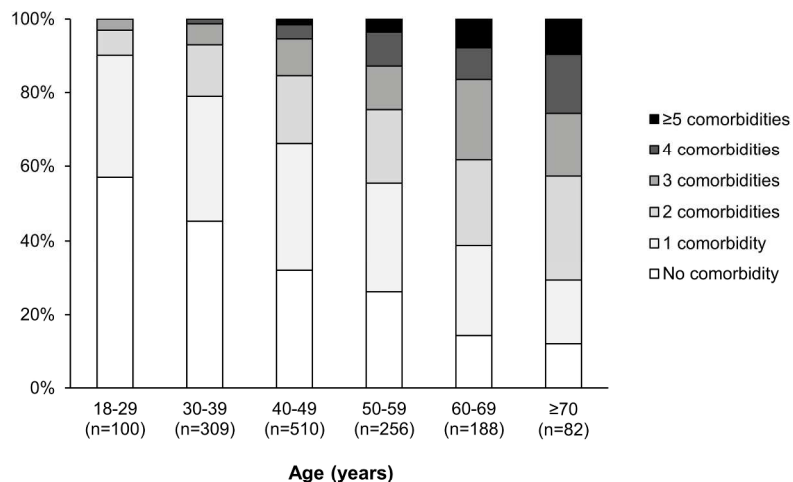

B) Type of chronic comorbidities by age group

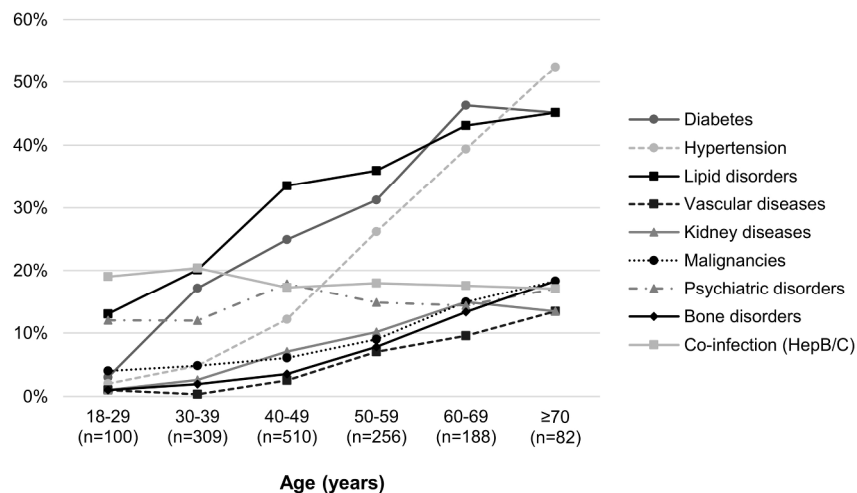

Number and type of chronic comorbidities by age group

218x285mm (300 x 300 DPI)

A) Number of co-medications by age group

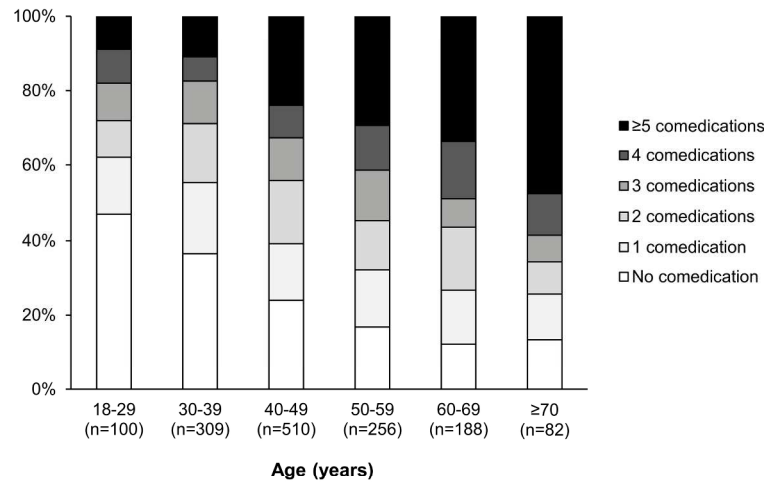

B) Type of co-medications by age group

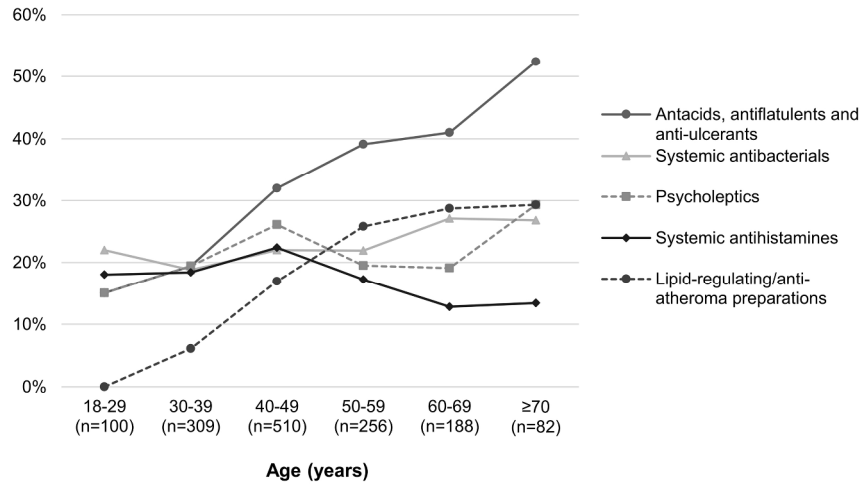

Number and type of co-medications prescribed by age group. Figure 3B shows the top five common co-medications in this study.

223x288mm (300 x 300 DPI)

**STROBE 2007 (v4) Statement—Checklist of items that should be included in reports of *cross-sectional studies***

| Section/Topic                | Item # | Recommendation                                                                                                                                                                       | Reported on page # |
|------------------------------|--------|--------------------------------------------------------------------------------------------------------------------------------------------------------------------------------------|--------------------|
| <b>Title and abstract</b>    | 1      | (a) Indicate the study's design with a commonly used term in the title or the abstract                                                                                               | 1, 2               |
|                              |        | (b) Provide in the abstract an informative and balanced summary of what was done and what was found                                                                                  | 2–3                |
| <b>Introduction</b>          |        |                                                                                                                                                                                      |                    |
| Background/rationale         | 2      | Explain the scientific background and rationale for the investigation being reported                                                                                                 | 5                  |
| Objectives                   | 3      | State specific objectives, including any prespecified hypotheses                                                                                                                     | 6                  |
| <b>Methods</b>               |        |                                                                                                                                                                                      |                    |
| Study design                 | 4      | Present key elements of study design early in the paper                                                                                                                              | 6                  |
| Setting                      | 5      | Describe the setting, locations, and relevant dates, including periods of recruitment, exposure, follow-up, and data collection                                                      | 7                  |
| Participants                 | 6      | (a) Give the eligibility criteria, and the sources and methods of selection of participants                                                                                          | 6–8                |
| Variables                    | 7      | Clearly define all outcomes, exposures, predictors, potential confounders, and effect modifiers. Give diagnostic criteria, if applicable                                             | 8–9                |
| Data sources/<br>measurement | 8*     | For each variable of interest, give sources of data and details of methods of assessment (measurement). Describe comparability of assessment methods if there is more than one group | 8                  |
| Bias                         | 9      | Describe any efforts to address potential sources of bias                                                                                                                            | 7                  |
| Study size                   | 10     | Explain how the study size was arrived at                                                                                                                                            | 7                  |
| Quantitative variables       | 11     | Explain how quantitative variables were handled in the analyses. If applicable, describe which groupings were chosen and why                                                         | 8                  |
| Statistical methods          | 12     | (a) Describe all statistical methods, including those used to control for confounding                                                                                                | 10                 |
|                              |        | (b) Describe any methods used to examine subgroups and interactions                                                                                                                  | 10                 |
|                              |        | (c) Explain how missing data were addressed                                                                                                                                          | N/A                |
|                              |        | (d) If applicable, describe analytical methods taking account of sampling strategy                                                                                                   | N/A                |
|                              |        | (e) Describe any sensitivity analyses                                                                                                                                                | N/A                |
| <b>Results</b>               |        |                                                                                                                                                                                      |                    |



|                          |     |                                                                                                                                                                                                              |        |
|--------------------------|-----|--------------------------------------------------------------------------------------------------------------------------------------------------------------------------------------------------------------|--------|
| Participants             | 13* | (a) Report numbers of individuals at each stage of study—eg numbers potentially eligible, examined for eligibility, confirmed eligible, included in the study, completing follow-up, and analysed            | 11     |
|                          |     | (b) Give reasons for non-participation at each stage                                                                                                                                                         | N/A    |
|                          |     | (c) Consider use of a flow diagram                                                                                                                                                                           | N/A    |
| Descriptive data         | 14* | (a) Give characteristics of study participants (eg demographic, clinical, social) and information on exposures and potential confounders                                                                     | 11     |
|                          |     | (b) Indicate number of participants with missing data for each variable of interest                                                                                                                          | N/A    |
| Outcome data             | 15* | Report numbers of outcome events or summary measures                                                                                                                                                         | 12, 14 |
| Main results             | 16  | (a) Give unadjusted estimates and, if applicable, confounder-adjusted estimates and their precision (eg, 95% confidence interval). Make clear which confounders were adjusted for and why they were included | 12–15  |
|                          |     | (b) Report category boundaries when continuous variables were categorized                                                                                                                                    | N/A    |
|                          |     | (c) If relevant, consider translating estimates of relative risk into absolute risk for a meaningful time period                                                                                             | N/A    |
| Other analyses           | 17  | Report other analyses done—eg analyses of subgroups and interactions, and sensitivity analyses                                                                                                               | 15–16  |
| <b>Discussion</b>        |     |                                                                                                                                                                                                              |        |
| Key results              | 18  | Summarise key results with reference to study objectives                                                                                                                                                     | 17     |
| Limitations              | 19  | Discuss limitations of the study, taking into account sources of potential bias or imprecision. Discuss both direction and magnitude of any potential bias                                                   | 22–23  |
| Interpretation           | 20  | Give a cautious overall interpretation of results considering objectives, limitations, multiplicity of analyses, results from similar studies, and other relevant evidence                                   | 23     |
| Generalisability         | 21  | Discuss the generalisability (external validity) of the study results                                                                                                                                        | 22–23  |
| <b>Other information</b> |     |                                                                                                                                                                                                              |        |
| Funding                  | 22  | Give the source of funding and the role of the funders for the present study and, if applicable, for the original study on which the present article is based                                                | 24     |

\*Give information separately for cases and controls in case-control studies and, if applicable, for exposed and unexposed groups in cohort and cross-sectional studies.

**Note:** An Explanation and Elaboration article discusses each checklist item and gives methodological background and published examples of transparent reporting. The STROBE checklist is best used in conjunction with this article (freely available on the Web sites of PLoS Medicine at <http://www.plosmedicine.org/>, Annals of Internal Medicine at <http://www.annals.org/>, and Epidemiology at <http://www.epidem.com/>). Information on the STROBE Initiative is available at [www.strobe-statement.org](http://www.strobe-statement.org).

# BMJ Open

## Chronic comorbidities and the use of co-medications in people living with HIV on antiretroviral therapy in Japan: a cross-sectional study using a hospital claims database

|                                 |                                                                                                                                                                                                                               |
|---------------------------------|-------------------------------------------------------------------------------------------------------------------------------------------------------------------------------------------------------------------------------|
| Journal:                        | <i>BMJ Open</i>                                                                                                                                                                                                               |
| Manuscript ID                   | bmjopen-2017-019985.R1                                                                                                                                                                                                        |
| Article Type:                   | Research                                                                                                                                                                                                                      |
| Date Submitted by the Author:   | 14-Feb-2018                                                                                                                                                                                                                   |
| Complete List of Authors:       | Ruzicka, Daniel; MSD K.K., Medical Affairs<br>Imai, Kentaro; MSD K.K., Oncology Clinical Development<br>Takahashi, Kenichi; MSD K.K., Japan Development<br>Naito, Toshio; Juntendo University, Department of General Medicine |
| <b>Primary Subject Heading</b>: | HIV/AIDS                                                                                                                                                                                                                      |
| Secondary Subject Heading:      | Infectious diseases                                                                                                                                                                                                           |
| Keywords:                       | INFECTIOUS DISEASES, HIV & AIDS < INFECTIOUS DISEASES, Epidemiology < INFECTIOUS DISEASES                                                                                                                                     |
|                                 |                                                                                                                                                                                                                               |

SCHOLARONE™  
Manuscripts

1  
2  
3  
4  
5  
6 [Title Page]  
7

8 **Title:**  
9

10  
11 **Chronic comorbidities and the use of co-medications in people living with HIV on**  
12  
13  
14 **antiretroviral therapy in Japan: a cross-sectional study using a hospital claims**  
15  
16 **database**  
17  
18  
19  
20  
21  
22

23 **Authors and affiliations:**  
24

25 Daniel J. Ruzicka<sup>1</sup>; Kentaro Imai<sup>2</sup>; Kenichi Takahashi<sup>3</sup>; Toshio Naito<sup>4</sup>  
26  
27  
28  
29  
30

31 <sup>1</sup> Medical Affairs, MSD K.K., Tokyo, Japan  
32  
33

34 <sup>2</sup> Oncology Clinical Development, MSD K.K., Tokyo, Japan  
35  
36

37 <sup>3</sup> Japan Development, MSD K.K., Tokyo, Japan  
38  
39

40 <sup>4</sup>Department of General Medicine, Juntendo University, Tokyo, Japan  
41  
42  
43  
44

45 **Corresponding author:**  
46

47  
48 Daniel J. Ruzicka  
49

50  
51 Medical Affairs, MSD K.K.  
52

53  
54 Kitanomaru Square, 1-13-12 Kudan-kita, Chiyoda-ku, Tokyo 102-8667, Japan  
55  
56  
57  
58  
59  
60

1  
2  
3  
4  
5  
6 Tel.: +81-3-6272-1681, E-mail: daniel.ruzicka@merck.com  
7  
8  
9  
10

11 **Word count:** 3464 words  
12  
13  
14  
15  
16  
17  
18  
19  
20  
21  
22  
23  
24  
25  
26  
27  
28  
29  
30  
31  
32  
33  
34  
35  
36  
37  
38  
39  
40  
41  
42  
43  
44  
45  
46  
47  
48  
49  
50  
51  
52  
53  
54  
55  
56  
57  
58  
59  
60

For peer review only

1  
2  
3  
4  
5  
6 **ABSTRACT** (276/300 words)  
7

8 **Objectives:** To investigate the prevalence of chronic comorbidities and the use of  
9  
10  
11 co-medications in people living with HIV (PLWH) and on antiretrovirals in Japan, by  
12  
13  
14 using a hospital claims database.  
15

16  
17 **Design:** Observational, retrospective, cross-sectional study.  
18

19  
20 **Setting:** A hospital claims database of Japanese hospitals that have advanced medical  
21  
22 treatment capabilities (i.e., advanced treatment hospitals, general hospitals, acute care  
23  
24 hospitals), which include those providing acute and chronic care (excluding nursing  
25  
26 homes or hospices).  
27  
28  
29

30  
31 **Participants:** A total of 1445 PLWH aged  $\geq 18$  years and with a prescription record of  
32  
33 antiretrovirals between January 2010 and December 2015 were identified from the  
34  
35  
36  
37 database.  
38

39  
40 **Outcome measures:** The number and types of chronic comorbidities, as well as the  
41  
42 number and types of co-medications, in different age groups of the PLWH.  
43  
44

45  
46 **Results:** The median (range) age of patients was 45 (18–90) years, and 90.4% were  
47  
48 men. Of the 1445 patients, 981 (67.9%) had at least one chronic comorbidity. Common  
49  
50 chronic comorbidities included lipid disorders (31.6%), diabetes (26.8%), hypertension  
51  
52 (18.2%), and hepatitis B/C co-infection (18.2%). Patients in the older age groups had  
53  
54  
55  
56  
57  
58  
59  
60

1  
2  
3  
4  
5  
6 greater numbers of chronic comorbidities. The most common chronic comorbidities in  
7  
8 the older age groups were hypertension, diabetes, and lipid disorders. The majority of  
9  
10 patients used at least one co-medication, and those in the older age groups used greater  
11  
12 numbers of co-medications. The most common therapeutic category of co-medication  
13  
14 included antacids, antiflatulents, and antiulcerants (31.7%). Of 148 malignancies  
15  
16 reported in 116 patients, 81 were AIDS-defining cancers, and 67 were  
17  
18 non-AIDS-defining cancers.  
19  
20  
21  
22  
23

24  
25 **Conclusions:** Chronic comorbidities and co-medications were more common in older  
26  
27 PLWH taking antiretrovirals in Japan. This suggests the need for giving special  
28  
29 attention to the appropriate management of this patient population.  
30  
31  
32  
33

### 34 35 36 37 **Strengths and limitations of this study**

- 38  
39 ● This is the first study to examine chronic comorbidities and co-medications in  
40  
41 PLWH taking antiretrovirals in Japan, using a large-scale hospital claims database.  
42  
43
- 44  
45 ● Patients were stratified into small age groups, which provided a clear picture of  
46  
47 patients' comorbidity and co-medication profiles by age.  
48  
49
- 50  
51 ● The cross-sectional study design prevented inference of causality between HIV  
52  
53 infection and chronic comorbidities or co-medications.  
54  
55  
56  
57  
58  
59

- This study has limitations inherent in the use of a hospital claims database, such as poorly recorded or missing information, which may result in misclassification.
- The generalizability of the study results may be limited because data contained in the database were collected from Japanese hospitals that can provide advanced medical treatment to patients, not from all the hospitals providing HIV treatment in Japan.

[Text]

## INTRODUCTION

Improvements in antiretroviral therapy (ART) over the last 15–20 years have prolonged the life expectancy of people living with HIV (PLWH). Life expectancy of PLWH is now reportedly similar to that of people without HIV.[1] However, in addition to HIV-related conditions, age-associated chronic comorbidities negatively affect the mortality rates of PLWH, as shown in various studies.[2-6] The increased number of chronic comorbidities among older PLWH is partly attributed to age-related changes in the physiological function and pharmacokinetics and/or pharmacodynamics of drugs.[7, 8] Other studies have suggested a longer duration of ART, which leads to increased toxicity, and HIV-induced persistent immunodeficiency and inflammation may also contribute to the increased number of comorbidities or higher prevalence of certain comorbidities among older PLWH.[9-12] Chronic inflammation and immune system changes by HIV infection were also found potentially involved in the mechanisms for possible premature ageing in PLWH.[13]

Studies have shown that over half of all HIV deaths are caused either by co-infection or age-associated non-infectious chronic comorbidities, including vascular diseases, hypertension, lipid disorders, diabetes mellitus, kidney diseases, malignancies,



1  
2  
3  
4  
5  
6 and bone disorders.[14, 15] Such age-associated chronic comorbidities in PLWH have  
7  
8 presented a new challenge for HIV treatment, especially in an ageing society such as  
9  
10  
11 Japan, which is among the countries with the longest life expectancy, for both  
12  
13  
14 sexes.[16] In Japan, more than 10% of newly diagnosed people with HIV in 2015 were  
15  
16 aged  $\geq 50$  years,[17] indicating a number of PLWH are relatively older. Although the  
17  
18 majority of newly diagnosed people with HIV were aged 20–49 years (88.2%),[17]  
19  
20 these people are also able to live to old age through appropriate management with  
21  
22 antiretrovirals. Thus, in line with the trends in other countries, in which the proportions  
23  
24 of PLWH aged  $\geq 50$  years have increased,[18] the number of older PLWH may also be  
25  
26 increasing in Japan. Because of the potentially long lifespans of PLWH in Japan, it is  
27  
28 important to obtain real-world data regarding the comorbidity profiles of these people.  
29  
30  
31  
32  
33  
34  
35

36  
37 Despite the importance of the association of chronic comorbidities with  
38  
39 mortality rates among PLWH, only a few small studies on chronic comorbidities among  
40  
41 PLWH in Japan have been published to date,[19, 20] and there have been no large  
42  
43 multi-centre epidemiological studies of chronic comorbidities in this population.  
44  
45  
46 Therefore in this study, to better understand a patient population, we examined the  
47  
48 frequency and type of chronic comorbidities of interest and the use of co-medications in  
49  
50  
51  
52  
53  
54  
55  
56  
57  
58  
59  
60

1  
2  
3  
4  
5  
6 different age groups of PLWH in Japan taking antiretrovirals and who were aged  $\geq 18$   
7  
8 years, using a Japanese hospital claims database.  
9

## 10 11 12 13 14 **METHODS**

### 15 16 17 **Study design**

18  
19  
20 This was an observational, retrospective, cross-sectional database study. Study  
21  
22 data were extracted from a hospital claims database of acute care hospitals in Japan,  
23  
24 compiled by Medical Data Vision Co., Ltd. (MDV, Tokyo, Japan). This  
25  
26 electronic-record-based hospital claims database contained information from  
27  
28 approximately 17 million patients in 288 acute care hospitals (as of January 2017) in  
29  
30 Japan ([https://www.mdv.co.jp/press/2017/detail\\_743.html](https://www.mdv.co.jp/press/2017/detail_743.html)); accounting for  
31  
32 approximately 17% of all acute care hospitals in Japan that use the diagnosis procedure  
33  
34 combination/per-diem payment system. It should be noted, however, that “acute care  
35  
36 hospitals” included in this database are not merely acute care-only or emergency  
37  
38 hospitals. It describes hospitals with advanced medical treatment capabilities (i.e.,  
39  
40 advanced treatment hospitals, general hospitals, acute care hospitals), so that hospitals  
41  
42 providing both acute and chronic care (excluding nursing homes or hospices) are also  
43  
44 included in the database. Because this terminology is highly specific to Japan, it may be  
45  
46  
47  
48  
49  
50  
51  
52  
53  
54  
55  
56  
57  
58  
59  
60

1  
2  
3  
4  
5  
6 confusing for readers outside Japan or not familiar with the MDV database. Therefore,  
7  
8 we refer to these hospitals included simply as “hospitals” hereinafter. We used this  
9  
10 database because in Japan PLWH usually receive treatment at regional hospitals for  
11  
12 HIV/AIDS treatment, and such designated hospitals are generally large and provide  
13  
14 advanced medical treatment for patients with acute and chronic diseases. The majority  
15  
16 of patients in the database are aged 15–64 years (51.5%), followed by  $\geq 65$  years  
17  
18 (34.2%) and 0–14 years (14.3%). The database contains both inpatient and outpatient  
19  
20 data from any department; these data include age, sex, department visited, date of  
21  
22 medical service, diagnosis codes, hospitalization (if any), medical procedures, and  
23  
24 prescriptions.  
25  
26  
27  
28  
29  
30  
31  
32  
33  
34  
35  
36

### 37 **Study population**

38  
39 People living with HIV, aged  $\geq 18$  years, with a diagnosis record of HIV, and  
40  
41 with a prescription record of antiretrovirals between January 2010 and December 2015  
42  
43 (study period) were included in the study. A person with any diagnosis record of HIV  
44  
45 was identified by the presence of at least one record of the International Classification  
46  
47 of Diseases 10th Revision (ICD-10) codes B20–24: HIV disease resulting in infectious  
48  
49 and parasitic diseases (B20), malignant neoplasms (B21), other specified diseases (B22),  
50  
51  
52  
53  
54  
55  
56  
57  
58  
59  
60

1  
2  
3  
4  
5  
6 other conditions (B23), and unspecified HIV disease (B24). The patients were required  
7  
8 to have at least one prescription record of any of the following antiretrovirals anytime  
9  
10 during the study period: nucleoside reverse transcriptase inhibitors (NRTIs),  
11  
12 non-nucleoside reverse transcriptase inhibitors (NNRTIs), protease inhibitors (PIs),  
13  
14 integrase strand transfer inhibitors (INSTIs), and entry inhibitors. This was for the  
15  
16 purpose of examining polypharmacy in PLWH that could induce a potential drug–drug  
17  
18 interaction (DDI) between antiretrovirals and co-medications, as well as to exclude  
19  
20 people with uncertain HIV status, such as those poorly recorded or intentionally  
21  
22 recorded for the purpose of a claim.  
23  
24  
25  
26  
27  
28  
29  
30

31 The data on patients who met these criteria (n=1445) during the study period  
32  
33 were extracted from the database. The patients were grouped based on their age at the  
34  
35 time of their last hospital visit, as follows: 18–29, 30–39, 40–49, 50–59, 60–69, and  $\geq 70$   
36  
37 years old.  
38  
39  
40  
41  
42  
43  
44

## 45 **Definitions of measures**

46  
47

48 The following patient data during the study period were extracted from the  
49  
50 database: demographic characteristics (age, sex), diagnoses of AIDS-defining conditions,  
51  
52 diagnoses of chronic comorbidities, prescriptions of antiretrovirals, and prescriptions of  
53  
54  
55  
56  
57  
58  
59  
60

1  
2  
3  
4  
5  
6 co-medications.  
7

8           The AIDS-defining conditions were identified using the ICD-10 codes and  
9  
10 disease names, and included the following: AIDS (B24); AIDS-related complex (B24);  
11  
12 HIV disease resulting in cytomegaloviral disease (B20.2), candidiasis (B20.4),  
13  
14 *Pneumocystis jirovecii* pneumonia (B20.6), Burkitt lymphoma (B21.1), and  
15  
16  
17 encephalopathy (B22.0); Kaposi sarcoma (B21.0/C46.9); and non-Hodgkin lymphoma  
18  
19  
20 (B21.2/C82–85/C91.5).  
21  
22  
23

24  
25           The chronic comorbidities were identified by the presence of relevant ICD-10  
26  
27 codes for particular diseases defined below. If the code was recorded at least once  
28  
29 during the study period, the patients were considered to have that corresponding chronic  
30  
31 comorbidity. These codes are recorded as disease records when patients receive not only  
32  
33 diagnoses but also any medical procedures, treatment, or prescriptions for the disease.  
34  
35  
36

37  
38           The chronic comorbidities in this study included type II diabetes (E11–14),  
39  
40 hypertension (I10–15, except for I11/I13), lipid disorders  
41  
42 (hypercholesterolaemia/hyperlipidaemia [E78.0–78.5]), vascular diseases (hypertensive  
43  
44 heart and renal diseases [I11/I13], angina pectoris [I20], myocardial infarction [I22],  
45  
46 stroke [I64]), kidney failure (N18–19), malignancies (B21.0/B21.2/C00–97), psychiatric  
47  
48 disorders (dementia [F01/F03], psychosis [F20–29], mania and depression [F30–32],  
49  
50  
51  
52  
53  
54  
55  
56  
57  
58  
59  
60

1  
2  
3  
4  
5  
6 anxiety [F40–41], insomnia [F51]), osteoporosis (M80–81), and hepatitis B/C  
7  
8  
9 co-infection (B18). Presence of two or more chronic comorbidities in a patient was  
10  
11 defined as multimorbidity.  
12

13  
14 Although all malignancies were considered as one category of chronic  
15  
16 comorbidity, we classified malignancies into two groups to further analyse them in  
17  
18 terms of their types: (1) AIDS-defining cancers, defined as Kaposi sarcoma  
19  
20 (B21.0/C46.9), non-Hodgkin lymphoma (B21.2/C82–85/C91.5) and cervix uteri  
21  
22 (C53.9) in accordance with Shiels et al.,[21] and (2) non-AIDS-defining cancers,  
23  
24 defined as all other malignancies.  
25  
26  
27  
28  
29

30  
31 Co-medication was defined as a non-antiretroviral medication prescribed for  
32  
33 use for  $\geq 30$  days total during the study period. All medications other than antiretrovirals  
34  
35 were considered in accordance with classification based on the therapeutic subgroups  
36  
37 (second level) of the Anatomical Therapeutic Chemical (ATC) codes. To focus on the  
38  
39 medications probably used for chronic treatment, or at least used for many days, instead  
40  
41 of those used for only a short time, we set the minimum prescription days (i.e., total  
42  
43 number of days for which the particular medication was supplied irrespective of  
44  
45 whether it was prescribed continuously or intermittently during the study period) as 30.  
46  
47  
48  
49  
50  
51

52  
53 All data on diseases and medications during the study period were considered  
54  
55  
56  
57  
58  
59

1  
2  
3  
4  
5  
6 as data pertaining to the PLWH and thus were counted regardless of whether they were  
7  
8 recorded before or after the diagnosis record of HIV. This was because it was  
9  
10 considered from a clinical perspective that the comorbidities developed before the HIV  
11  
12 infection were persistent over the whole study period.  
13  
14  
15  
16  
17  
18  
19

### 20 **Ethical statement**

21  
22 The requirement for informed consent was waived because this was an  
23  
24 observational study using de-identified claims data and the Japanese Ethical Guidelines  
25  
26 for Medical and Health Research Involving Human Subjects do not apply to a study  
27  
28 exclusively using de-identified data.  
29  
30  
31  
32  
33  
34  
35  
36

### 37 **Statistical Analysis**

38  
39 Demographic data were descriptively summarized using the median and range  
40  
41 for continuous variables or the number and percentage (%) of patients for categorical  
42  
43 variables. Chronic comorbidities and co-medications were descriptively summarized by  
44  
45 age group. The 95% confidence intervals (CIs) were calculated using the exact binomial  
46  
47 method proposed by Clopper and Pearson.[22] All statistical analyses were performed  
48  
49 using SAS 9.4 (SAS Institute Inc., Cary, NC, USA) software.  
50  
51  
52  
53  
54  
55  
56  
57  
58  
59  
60

## RESULTS

### Patient characteristics

Of 3155 PLWH, 1710 were excluded because of no prescription records of antiretrovirals. Overall, 1445 PLWH and with antiretroviral prescriptions, identified from 47 hospitals, were included in this study. They had a median (range) age of 45 (18–90) years, and 90.4% were men (Table 1). Of these patients, 703 (48.7%) had an AIDS-defining condition at some point during the study period. Figure 1 shows the age and sex distribution of patients. The majority were aged 40–49 years, followed by 30–39, 50–59, 60–69, 18–29 and  $\geq 70$  years.

**Table 1. Demographic characteristics of studied people living with HIV (n=1445)**

|                             | Total<br>(n=1445) |
|-----------------------------|-------------------|
|                             | n (%)             |
| Age (years), median (range) | 45 (18–90)        |
| Male                        | 1306 (90.4)       |
| AIDS-defining conditions    | 703 (48.7)        |
| Chronic comorbidity         |                   |
| Diabetes                    | 387 (26.8)        |
| Hypertension                | 263 (18.2)        |
| Lipid disorders             | 456 (31.6)        |
| Vascular diseases           | 62 (4.3)          |
| Kidney failure              | 110 (7.6)         |



|                                          |             |
|------------------------------------------|-------------|
| Malignancies                             | 116 (8.0)   |
| Psychiatric disorders                    | 219 (15.2)  |
| Osteoporosis                             | 85 (5.9)    |
| Hepatitis B/C co-infection               | 263 (18.2)  |
| Use of a non-antiretroviral medication * | 1086 (75.2) |
| Type of key drug among antiretrovirals   |             |
| INSTI                                    | 789 (54.8)  |
| NNRTI                                    | 359 (24.9)  |
| PI                                       | 617 (42.8)  |

\*Non-antiretroviral medication prescribed for use for  $\geq 30$  days total during the study period was taken into consideration.

INSTI, integrase strand transfer inhibitor; NNRTI, non-nucleoside reverse transcriptase inhibitor; PI, protease inhibitor.

### Chronic comorbidities

Overall, 1961 chronic comorbidities were reported in 981 (67.9%) PLWH, and 534 (37.0%) patients had multimorbidity (two or more chronic comorbidities). The most common chronic comorbidities were lipid disorders (31.6%; 95% CI, 29.2%–34.0%), followed by diabetes (26.8%; 95% CI, 24.5%–29.1%), hypertension (18.2%; 95% CI, 16.2%–20.3%), and hepatitis B/C co-infection (18.2%; 95% CI, 16.2%–20.3%) (Table 1).

Figure 2A shows the number of chronic comorbidities by age. Although 57.0% (57/100) of patients aged 18–29 years had no chronic comorbidity, the proportions with no chronic comorbidity decreased in the older age groups. More patients in the older

1  
2  
3  
4  
5  
6 age groups had multimorbidity: 21.0% (65/309) of those aged 30–39 years, 44.5%  
7  
8 (114/256) of those aged 50–59 years, and 70.7% (58/82) of those aged  $\geq 70$  years. No  
9  
10  
11 patients aged 18–29 years had four or more chronic comorbidities, while 25.6% (21/82)  
12  
13  
14 of those aged  $\geq 70$  years did.  
15

16  
17 Figure 2B shows the prevalence of different types of chronic comorbidities by  
18  
19 age group. The prevalence of most chronic comorbidities tended to be higher in the  
20  
21 older age groups, but such trends were not observed for psychiatric disorders  
22  
23 (prevalence range: 12.0%–17.8%;  $p=0.3271$ , Cochran–Armitage trend test) and  
24  
25 hepatitis B/C co-infection (17.1%–20.4%,  $p=0.4501$ , Cochran–Armitage trend test). The  
26  
27  
28 most common chronic comorbidities in the older age groups were hypertension,  
29  
30  
31 diabetes, and lipid disorders. Hypertension was the most common chronic comorbidity  
32  
33  
34 in the  $\geq 70$ -year group (52.4%; 95% CI, 41.1%–63.6%), diabetes in the 60–69-year  
35  
36  
37 group (46.3%; 95% CI, 39.0%–53.7%), and lipid disorders in the 50–59-year group  
38  
39  
40 (35.9%; 95% CI, 30.1%–42.1%). The prevalence of vascular diseases, kidney failure,  
41  
42  
43 malignancies, or osteoporosis in the  $\geq 70$ -year group was 13.4%–18.3%, which was  
44  
45  
46 approximately 10%–15% higher than its counterpart in the 18–29-year group (1.0%–  
47  
48  
49 4.0%) ( $p<0.0001$  for all four comorbidity types, Cochran–Armitage trend test).  
50  
51  
52  
53  
54  
55  
56  
57  
58  
59  
60

## Co-medications

Of the 1445 PLWH, 1086 (75.2%) used at least one co-medication and 342 (23.7%) used five or more, apart from antiretrovirals. Figure 3A shows the number of co-medications (excluding antiretrovirals) by age group. The proportions of patients who used at least one co-medication were 53.0% (53/100) in the 18–29-year group, 76.1% (388/510) in the 40–49-year group, and 86.6% (71/82) in the  $\geq 70$ -year group. More patients in the older age groups used greater numbers of co-medications: 11.0% (34/309) of patients in the 30–39-year group, 29.3% (75/256) in the 50–59-year group, and 47.6% (39/82) in the  $\geq 70$ -year group used five or more co-medications.

The 10 most common therapeutic categories were antacids, antiflatulents, and antiulcerants (31.7%); systemic antibacterials (22.2%); psycholeptics (22.0%); systemic antihistamines (18.5%); lipid-regulating/anti-atheroma preparations (17.2%); anti-inflammatory and anti-rheumatic products (15.5%); antidiarrhoeals, oral electrolyte replacers, and intestinal anti-inflammatories (12.1%); agents acting on the renin-angiotensin system (11.1%); vitamins (10.2%); and cough and cold preparations (9.6%). Regarding the top five most common co-medications, the proportions of patients who took respective co-medications by age group are shown in Figure 3B. Antacids, antiflatulents, and antiulcerants were the most common in most of the age

1  
2  
3  
4  
5  
6 groups, notably in the  $\geq 70$ -year group (52.4%). The proportions of patients taking  
7  
8 systemic antibacterials, psycholeptics, or systemic antihistamines were similar across all  
9  
10 age groups. Lipid-regulating agents were used more commonly in the older age groups:  
11  
12 notably in 25%–30% of patients aged  $\geq 50$  years.  
13  
14  
15  
16  
17  
18  
19

## 20 **Malignancies**

21  
22 In this study, 148 malignancies were reported in 116 PLWH, including 81  
23  
24 AIDS-defining cancers and 67 non-AIDS-defining cancers. Figure 4 shows the  
25  
26 proportions of patients with AIDS-defining cancers and those of patients with  
27  
28 non-AIDS-defining cancers among patients with any malignancies within each age  
29  
30 group. The figure illustrates that AIDS-defining cancers were more common in people  
31  
32  $< 60$  years old, whereas non-AIDS-defining cancers were more frequent in people aged  
33  
34  $\geq 60$  years. Table 2 shows the proportions of patients who had respective cancer types in  
35  
36 these 116 PLWH with any malignancies. Non-Hodgkin lymphoma was the most  
37  
38 common type of AIDS-defining cancer (54.3%), and bronchus or lung cancers were the  
39  
40 most common types of non-AIDS-defining cancers (6.9%).  
41  
42  
43  
44  
45  
46  
47  
48  
49  
50  
51  
52

53 **Table 2. Proportions of studied patients with respective cancer types among people**  
54 **living with HIV who had any malignancies (n=116)**  
55  
56  
57  
58  
59  
60

|                                                             | Patients with malignancy<br>(n=116) |
|-------------------------------------------------------------|-------------------------------------|
|                                                             | n (%)                               |
| <b>AIDS-defining cancer</b>                                 |                                     |
| Non-Hodgkin lymphoma                                        | 63 (54.3)                           |
| Kaposi sarcoma                                              | 16 (13.8)                           |
| Cervix uteri                                                | 2 (1.7)                             |
| <b>Non-AIDS-defining cancer</b>                             |                                     |
| Bronchus or lung                                            | 8 (6.9)                             |
| Secondary malignant neoplasm of bone and bone marrow        | 6 (5.2)                             |
| Colon                                                       | 3 (2.6)                             |
| Breast                                                      | 3 (2.6)                             |
| Malignant neoplasm, without specification of site           | 3 (2.6)                             |
| Secondary malignant neoplasm of brain and cerebral meninges | 3 (2.6)                             |
| Acute myeloblastic leukaemia (AML)                          | 3 (2.6)                             |
| Multiple myeloma                                            | 3 (2.6)                             |
| Stomach                                                     | 2 (1.7)                             |
| Secondary malignant neoplasm of lung                        | 2 (1.7)                             |
| Liver cell carcinoma                                        | 2 (1.7)                             |
| Sigmoid colon                                               | 2 (1.7)                             |
| Thoracic part of oesophagus                                 | 2 (1.7)                             |
| Skin of trunk                                               | 2 (1.7)                             |
| Others*                                                     | 23 (19.8)                           |

\*Non-AIDS-defining cancer types present only in one patient were grouped and presented as “others.”

## DISCUSSION

1  
2  
3  
4  
5  
6 This is the first study to investigate the prevalence of chronic comorbidities and  
7  
8 the use of co-medications in PLWH taking antiretrovirals in Japan, using a large  
9  
10 hospital claims database. The study found that chronic comorbidities were common in  
11  
12 PLWH in Japan, particularly hypertension, diabetes, and lipid disorders among older  
13  
14 patients. In terms of burden by age group, this study revealed that older patients had  
15  
16 greater numbers of chronic comorbidities and also used greater numbers of  
17  
18 co-medications than younger patients did.  
19  
20  
21  
22  
23

24  
25 Greater numbers of comorbidities in older people with HIV were also reported  
26  
27 in previous international studies.[23-25] Additionally, older people with HIV in  
28  
29 Switzerland and the United States were more likely to have diabetes mellitus,  
30  
31 cardiovascular diseases, non-AIDS-defining malignancies, osteoporosis, or liver  
32  
33 diseases than younger patients.[23, 24] Similar to those studies, in the present study,  
34  
35 diabetes mellitus, vascular diseases, and osteoporosis were more common in older  
36  
37 PLWH. Kidney failure was also more common in older patients, as suggested by a  
38  
39 previous study reporting that both HIV infection and increased age were associated with  
40  
41 an increased risk of kidney diseases in PLWH.[26] Previous studies also showed PLWH  
42  
43 had a greater number of age-associated comorbidities at earlier ages than those living  
44  
45  
46  
47  
48  
49  
50  
51  
52  
53  
54  
55  
56  
57  
58  
59  
60

1  
2  
3  
4  
5  
6 without HIV, suggesting premature ageing in PLWH.[25, 27] This is a topic we plan to  
7  
8 examine in our future research using a control group of people without HIV.  
9

10  
11           Despite the decreased incidence of non-Hodgkin lymphoma and Kaposi  
12  
13 sarcoma, owing to antiretrovirals,[21, 28] AIDS-defining cancers remain a great  
14  
15 concern in PLWH in North America.[29] However, in the present study, these cancers  
16  
17 were not commonly observed (non-Hodgkin lymphoma, 4.4% [63/1445]; Kaposi  
18  
19 sarcoma, 1.1% [16/1445]). Although direct comparison is not appropriate because of  
20  
21 different study methods (i.e., different study populations, different antiretroviral eras),  
22  
23 the prevalence was much lower than that reported in a previous Japanese study in which  
24  
25 non-Hodgkin lymphoma and Kaposi sarcoma were present in 37.9% and 15.2%,  
26  
27 respectively, of autopsied people with HIV and having received antiretrovirals from  
28  
29 1985–2012.[30] Another interesting finding of the present study was that  
30  
31 non-AIDS-defining cancers, which accounted for 45% of all malignancies, seemed  
32  
33 more frequent in patients in older age groups, being observed in >60% of PLWH aged  
34  
35  $\geq 60$  years who had any malignancies. A previous study showed that age-related cancers,  
36  
37 such as lung, prostate, colorectal, and breast cancers, were common among older  
38  
39 PLWH.[31] Another study also reported an increase in non-AIDS-defining cancers  
40  
41 among the HIV population as a consequence of ageing of the AIDS population.[21] In  
42  
43  
44  
45  
46  
47  
48  
49  
50  
51  
52  
53  
54  
55  
56  
57  
58  
59  
60

1  
2  
3  
4  
5  
6 light of these previous findings, our results highlight the importance of  
7  
8  
9 non-AIDS-defining cancers among PLWH because of their extended lifespans.  
10  
11 However, in the present study it was difficult to illuminate any trends in the prevalence  
12  
13  
14 of malignancies by age group because of the small number of patients with  
15  
16  
17 malignancies. Thus, the prevalence of malignancies by age and cancer type should be  
18  
19  
20 interpreted carefully, and examined further in future studies.  
21

22  
23 Our results indicated that use of co-medications was common among older  
24  
25 PLWH, although the proportions of patients with five or more co-medications in those  
26  
27 aged  $\geq 50$  years were smaller (33.7%) compared with a previous study (54%),[32]  
28  
29 suggesting the management of older PLWH may be complicated because of DDIs  
30  
31 attributed to increased use of co-medications.[33, 34] Moreover, in our study the use of  
32  
33  
34 co-medications was common even in younger PLWH, and over half of patients aged  
35  
36  
37 18–29 years used at least one co-medication. These results suggest the importance of  
38  
39  
40 potential DDIs not only among the older PLWH but also the younger ones. For instance,  
41  
42  
43 DDIs between PIs or NNRTIs and co-medications (e.g., cardiovascular agents,  
44  
45  
46 anti-platelet agents, psychotropics, antidepressants, analgesics, and methadone) can be  
47  
48  
49 common in PLWH.[33, 34] The common use of lipid-regulating agents and agents  
50  
51  
52 acting on the renin-angiotensin system in the present study probably reflected the high  
53  
54  
55  
56  
57  
58  
59  
60



1  
2  
3  
4  
5  
6 prevalence of lipid disorders and hypertension, especially in older patients, for some of  
7  
8 whom antiretrovirals may be partly responsible for changes in lipid metabolism,[35, 36]  
9  
10 although its underlying mechanisms in PLWH are complex. Psycholeptics were also  
11  
12 commonly used irrespective of age, which was consistent with previous studies,[33, 34]  
13  
14 and probably due to HIV disease progression and treatment with antiretrovirals  
15  
16 associated with psychiatric disorders.[37, 38] The most common use, of antacids,  
17  
18 antiflatulents, and antiulcerants (31.7%), may partly reflect the common presence of  
19  
20 gastric ulcers in hospitalized older Japanese patients,[39] although not all of our study  
21  
22 population had hospitalization. Because antacids can reduce serum concentrations of  
23  
24 several antiretrovirals by altering the acid environment,[40, 41] Japanese physicians  
25  
26 need to pay careful attention when prescribing antiretrovirals to patients using them.  
27  
28  
29  
30  
31  
32  
33  
34  
35  
36

37         The present study has some limitations. Because it was a cross-sectional study,  
38  
39 chronic comorbidities/co-medications were not examined against the timing of a  
40  
41 diagnosis of HIV infection. It should be noted that chronic  
42  
43 comorbidities/co-medications in this study included those coded before a diagnosis  
44  
45 record of HIV infection. This study is limited in its ability to draw valid conclusions  
46  
47 about possible causality between HIV infection and chronic  
48  
49 comorbidities/co-medications; therefore, causality should be confirmed through more  
50  
51  
52  
53  
54  
55  
56  
57  
58  
59  
60

1  
2  
3  
4  
5  
6 rigorous studies. Other limitations include those inherent to observational studies using  
7  
8 a hospital claims database, such as poorly recorded or missing information, which may  
9  
10 result in misclassification. For example, because the database is hospital-based,  
11  
12 medical/treatment history recorded at different hospitals could not be obtained, meaning  
13  
14 that patients may have received co-medications for other diseases at different hospitals.  
15  
16 Additionally, the study results may not be generalizable to the overall population living  
17  
18 with HIV with or without taking antiretrovirals in Japan, because some patients in this  
19  
20 database who required acute care at these hospitals may be more ill than other PLWH  
21  
22 who did not require acute care or those treated at hospitals not providing advanced  
23  
24 medical treatment; in addition, co-medication results may over-represent drugs used by  
25  
26 PLWH who sought hospital care, which may differ from those of PLWH who do not  
27  
28 seek hospital care; HIV treatment choices in these included hospitals may not be  
29  
30 representative of those made in other hospitals (i.e., hospitals not providing advanced  
31  
32 medical treatment); and this study excluded patients without a record of antiretrovirals,  
33  
34 who represent PLWH not taking antiretrovirals. Finally, because detailed data regarding  
35  
36 HIV infection status were not available, we could not analyse the potential relationships  
37  
38 between chronic comorbidities and CD4 count, HIV-RNA, or ART duration.  
39  
40  
41  
42  
43  
44  
45  
46  
47  
48  
49  
50  
51  
52  
53  
54  
55  
56  
57  
58  
59  
60

1  
2  
3  
4  
5  
6 In conclusion, chronic comorbidities and co-medications were more common  
7  
8 among older PLWH and taking antiretrovirals in Japan, suggesting the need for special  
9  
10 treatment and attention by physicians. Although our results, particularly the types of  
11  
12 co-medications, may not necessarily be extrapolated to a different patient population,  
13  
14 they will help remind Japanese physicians of the importance of being aware of such  
15  
16 complicated medical profiles of PLWH, especially patients who seek treatment at a  
17  
18 hospital, so as to treat these people while mindful of potential DDIs. Application of our  
19  
20 results can support the development of optimal healthcare strategies for this growing  
21  
22 population.  
23  
24  
25  
26  
27  
28  
29  
30  
31  
32  
33  
34  
35  
36  
37  
38  
39  
40  
41  
42  
43  
44  
45  
46  
47  
48  
49  
50  
51  
52  
53  
54  
55  
56  
57  
58  
59  
60

## Acknowledgments

Medical writing and statistical supports were provided by Clinical Study Support, Inc.

We are particularly grateful for the assistance given by Noriyo Ihara of MSD, K.K.

## Author contributions

DJR contributed to the study design. DJR, KI, and KT contributed to the data analysis and interpretation. DJR, KI, KT, and TN revised the manuscript draft critically and approved the final version of the manuscript to be published.

## Funding statement

This study was supported by MSD K.K., Tokyo, Japan.

## Competing interests statement

DJR, KI, and KT are employees of MSD K.K., Tokyo, Japan. TN has received no funding for this study but received lecture fees from MSD K.K., Tokyo, Japan.

## Data sharing statement

No additional data are available.

1  
2  
3  
4  
5  
6  
7  
8  
9  
10  
11  
12  
13  
14  
15  
16  
17  
18  
19  
20  
21  
22  
23  
24  
25  
26  
27  
28  
29  
30  
31  
32  
33  
34  
35  
36  
37  
38  
39  
40  
41  
42  
43  
44  
45  
46  
47  
48  
49  
50  
51  
52  
53  
54  
55  
56  
57  
58  
59  
60

For peer review only

## REFERENCES

1. Nakagawa F, May M, Phillips A. Life expectancy living with HIV: recent estimates and future implications. *Curr Opin Infect Dis* 2013;26:17–25.
2. Guaraldi G, Orlando G, Zona S, et al. Premature age-related comorbidities among HIV-infected persons compared with the general population. *Clin Infect Dis* 2011;53:1120–6.
3. Hasse B, Ledergerber B, Furrer H, et al. Morbidity and aging in HIV-infected persons: the Swiss HIV cohort study. *Clin Infect Dis* 2011;53:1130–9.
4. Wu PY, Chen MY, Hsieh SM, et al. Comorbidities among the HIV-infected patients aged 40 years or older in Taiwan. *PLOS ONE* 2014;9:e104945.
5. Vance DE, Mugavero M, Willig J, et al. Aging with HIV: a cross-sectional study of comorbidity prevalence and clinical characteristics across decades of life. *J Assoc Nurses AIDS Care* 2011;22:17–25.
6. Schouten J, Wit FW, Stolte IG, et al. Cross-sectional comparison of the prevalence of age-associated comorbidities and their risk factors between HIV-infected and uninfected individuals: the AGEhIV cohort study. *Clin Infect Dis* 2014;59:1787–97.

- 1  
2  
3  
4  
5  
6 7. Mangoni AA, Jackson SH. Age-related changes in pharmacokinetics and  
7  
8 pharmacodynamics: basic principles and practical applications. *Br J Clin*  
9  
10  
11 *Pharmacol* 2004;57:6–14.
- 12  
13  
14 8. Sotaniemi EA, Arranto AJ, Pelkonen O, et al. Age and cytochrome P450-linked  
15  
16 drug metabolism in humans: an analysis of 226 subjects with equal histopathologic  
17  
18 conditions. *Clin Pharmacol Ther* 1997;61:331–9.
- 19  
20 9. Edelman EJ, Gordon KS, Glover J, et al. The next therapeutic challenge in HIV:  
21  
22 polypharmacy. *Drugs Aging* 2013;30:613–28.
- 23  
24  
25 10. Seaberg EC, Muñoz A, Lu M, et al. Association between highly active  
26  
27 antiretroviral therapy and hypertension in a large cohort of men followed from 1984  
28  
29 to 2003. *AIDS* 2005;19:953–60.
- 30  
31  
32 11. Deeks SG, Phillips AN. HIV infection, antiretroviral treatment, ageing, and  
33  
34 non-AIDS related morbidity. *BMJ* 2009;338:a3172.
- 35  
36  
37 12. Deeks SG. HIV infection, inflammation, immunosenescence, and aging. *Annu Rev*  
38  
39 *Med* 2011;62:141–55.
- 40  
41  
42 13. Wing EJ. HIV and aging. *Int J Infect Dis* 2016;53:61–8.
- 43  
44  
45  
46  
47  
48  
49  
50  
51  
52  
53  
54  
55  
56  
57  
58  
59  
60

- 1  
2  
3  
4  
5  
6 14. Weber R, Sabin CA, Friis-Møller N, et al. Liver-related deaths in persons infected  
7  
8 with the human immunodeficiency virus: the D:A:D study. *Arch Intern Med*  
9  
10  
11 2006;166:1632–41.  
12  
13  
14 15. Sackoff JE, Hanna DB, Pfeiffer MR, et al. Causes of death among persons with  
15  
16 AIDS in the era of highly active antiretroviral therapy: New York City. *Ann Intern*  
17  
18 *Med* 2006;145:397–406.  
19  
20  
21  
22 16. Global Health Observatory (GHO) Data. World Health Organization (2016).  
23  
24 [http://www.who.int/gho/publications/world\\_health\\_statistics/2016/en/](http://www.who.int/gho/publications/world_health_statistics/2016/en/) (accessed 19  
25  
26 Mar 2017).  
27  
28  
29  
30  
31 17. Trends in AIDS occurrence report (2015). In Japanese.  
32  
33 [http://api-net.jfap.or.jp/status/2015/15nenpo/15nenpo\\_menu.html](http://api-net.jfap.or.jp/status/2015/15nenpo/15nenpo_menu.html) (Accessed 19  
34  
35 Mar 2017).  
36  
37  
38  
39 18. Costagliola D. Demographics of HIV and aging. *Curr Opin HIV AIDS* 2014;9:294–  
40  
41 301.  
42  
43  
44  
45 19. Yanagimoto S, Yotsuyanagi H, Kikuchi Y, et al. Chronic hepatitis B in patients  
46  
47 coinfecting with human immunodeficiency virus in Japan: a retrospective  
48  
49 multicenter analysis. *J Infect Chemother* 2012;18:883–90.  
50  
51  
52  
53  
54  
55  
56  
57  
58  
59  
60



- 1  
2  
3  
4  
5  
6 20. Yanagisawa N, Ando M, Ajisawa A, et al. Clinical characteristics of kidney disease  
7  
8 in Japanese HIV-infected patients. *Nephron Clin Pract* 2011;118:c285–91.  
9  
10  
11 21. Shiels MS, Pfeiffer RM, Gail MH, et al. Cancer burden in the HIV-infected  
12  
13 population in the United States. *J Natl Cancer Inst* 2011;103:753–62.  
14  
15  
16 22. Clopper CJ, Pearson ES. The use of confidence or fiducial limits illustrated in the  
17  
18 case of the binomial. *Biometrika* 1934;26:404–13.  
19  
20  
21 23. Hasse B, Ledergerber B, Furrer H, et al. Morbidity and aging in HIV-infected  
22  
23 persons: the Swiss HIV cohort study. *Clin Infect Dis* 2011;53:1130–9.  
24  
25  
26 24. Goulet JL, Fultz SL, Rimland D, et al. Aging and infectious diseases: do patterns of  
27  
28 comorbidity vary by HIV status, age, and HIV severity? *Clin Infect Dis*  
29  
30 2007;45:1593–601.  
31  
32  
33 25. Guaraldi G, Orlando G, Zona S, et al. Premature age-related comorbidities among  
34  
35 HIV-infected persons compared with the general population. *Clin Infect Dis*  
36  
37 2011;53:1120–6.  
38  
39  
40  
41  
42  
43  
44  
45 26. Hirschhorn LR, Kaaya SF, Garrity PS, et al. Cancer and the 'other'  
46  
47 noncommunicable chronic diseases in older people living with HIV/AIDS in  
48  
49 resource-limited settings: a challenge to success. *AIDS* 2012;26(Suppl 1):S65–S75.  
50  
51  
52  
53  
54  
55  
56  
57  
58  
59  
60

- 1  
2  
3  
4  
5  
6 27. Schouten J, Wit FW, Stolte IG, et al. Cross-sectional comparison of the prevalence  
7  
8 of age-associated comorbidities and their risk factors between HIV-infected and  
9  
10 uninfected individuals: the AGEhIV cohort study. *Clin Infect Dis* 2014;59:1787–  
11  
12 97.  
13  
14  
15  
16  
17 28. Patel P, Hanson DL, Sullivan PS, et al. Incidence of types of cancer among  
18  
19 HIV-infected persons compared with the general population in the United States,  
20  
21 1992-2003. *Ann Intern Med* 2008;148:728–36.  
22  
23  
24  
25 29. Silverberg MJ, Lau B, Achenbach CJ, et al. Cumulative incidence of cancer among  
26  
27 persons with HIV in North America: a cohort study. *Ann Intern Med*  
28  
29 2015;163:507–18.  
30  
31  
32  
33  
34 30. Katano H, Hishima T, Mochizuki M, et al. The prevalence of opportunistic  
35  
36 infections and malignancies in autopsied patients with human immunodeficiency  
37  
38 virus infection in Japan. *BMC Infect Dis* 2014;14:229.  
39  
40  
41  
42  
43 31. Yanik EL, Katki HA, Engels EA. Cancer risk among the HIV-infected elderly in  
44  
45 the United States. *AIDS* 2016;30:1663–8.  
46  
47  
48 32. Holtzman C, Armon C, Tedaldi E, et al. Polypharmacy and risk of antiretroviral  
49  
50 drug interactions among the aging HIV-infected population. *J Gen Intern Med*  
51  
52 2013;28:1302–10.  
53  
54  
55  
56  
57  
58  
59  
60

- 1  
2  
3  
4  
5  
6 33. Tseng A, Szadkowski L, Walmsley S, et al. Association of age with polypharmacy  
7  
8 and risk of drug interactions with antiretroviral medications in HIV-positive  
9  
10 patients. *Ann Pharmacother* 2013;47:1429–39.  
11  
12  
13  
14 34. Marzolini C, Back D, Weber R, et al. Ageing with HIV: medication use and risk for  
15  
16 potential drug-drug interactions. *J Antimicrob Chemother* 2011;66:2107–11.  
17  
18  
19  
20 35. da Cunha J, Maselli LM, Stern AC, et al. Impact of antiretroviral therapy on lipid  
21  
22 metabolism of human immunodeficiency virus-infected patients: Old and new  
23  
24 drugs. *World J Virol* 2015;4:56–77.  
25  
26  
27  
28 36. Lake JE, Currier JS. Metabolic disease in HIV infection. *Lancet Infect Dis*  
29  
30 2013;13:964–75.  
31  
32  
33  
34 37. Brogan K, Lux J. Management of common psychiatric conditions in the  
35  
36 HIV-positive population. *Curr HIV/AIDS Rep* 2009;6:108–15.  
37  
38  
39  
40 38. Watkins CC, Treisman GJ. Neuropsychiatric complications of aging with HIV. *J*  
41  
42 *Neurovirol* 2012;18:277–90.  
43  
44  
45 39. Mizokami F, Koide Y, Noro T, et al. Polypharmacy with common diseases in  
46  
47 hospitalized elderly patients. *Am J Geriatr Pharmacother* 2012;10:123–8.  
48  
49  
50  
51 40. de Maat MM, Ekhart GC, Huitema AD, et al. Drug interactions between  
52  
53 antiretroviral drugs and comedicated agents. *Clin Pharmacokinet* 2003;42:223–82.  
54  
55  
56  
57  
58  
59

- 1  
2  
3  
4  
5  
6 41. Nachega JB, Hsu AJ, Uthman OA, et al. Antiretroviral therapy adherence and  
7  
8 drug-drug interactions in the aging HIV population. *AIDS* 2012;26(Suppl 1):S39–  
9  
10  
11 S53.  
12  
13  
14  
15  
16  
17  
18  
19  
20  
21  
22  
23  
24  
25  
26  
27  
28  
29  
30  
31  
32  
33  
34  
35  
36  
37  
38  
39  
40  
41  
42  
43  
44  
45  
46  
47  
48  
49  
50  
51  
52  
53  
54  
55  
56  
57  
58  
59  
60

1  
2  
3  
4  
5  
6 [Figure legends]  
7

8 **Figure 1. Age and sex distribution of studied patients living with HIV (n=1445)**  
9

10  
11  
12  
13  
14 **Figure 2. Number and type of chronic comorbidities by age group**  
15

16  
17 Note: \* indicates  $p < 0.0001$  under the Cochran–Armitage trend test.  
18

19  
20  
21 **Figure 3. Number and type of co-medications prescribed by age group**  
22

23  
24 Figure 3B shows the top five common co-medications in this study.  
25  
26  
27  
28

29  
30 **Figure 4. Proportions of studied patients with AIDS-defining cancers and**  
31  
32 **non-AIDS-defining cancers among patients with any malignancies within each age**  
33  
34 **group**  
35  
36  
37  
38  
39  
40  
41  
42  
43  
44  
45  
46  
47  
48  
49  
50  
51  
52  
53  
54  
55  
56  
57  
58  
59  
60

1  
2  
3  
4  
5  
6  
7  
8  
9  
10  
11  
12  
13  
14  
15  
16  
17  
18  
19  
20  
21  
22  
23  
24  
25  
26  
27  
28  
29  
30  
31  
32  
33  
34  
35  
36  
37  
38  
39  
40  
41  
42  
43  
44  
45  
46  
47  
48  
49  
50  
51  
52  
53  
54  
55  
56  
57  
58  
59  
60

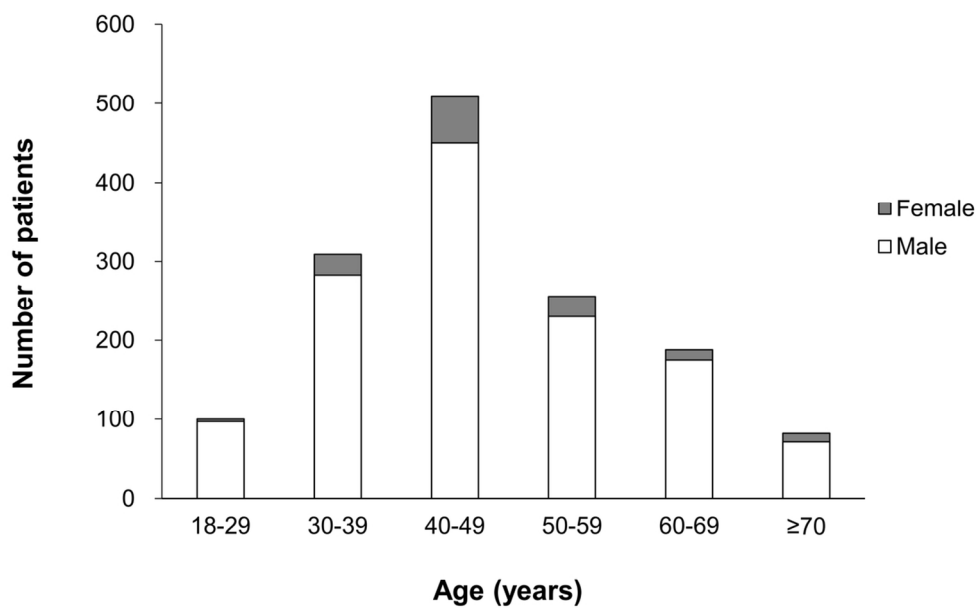

Age and sex distribution of studied patients living with HIV (n=1445)

111x69mm (300 x 300 DPI)

Review only

A) Number of chronic comorbidities by age group

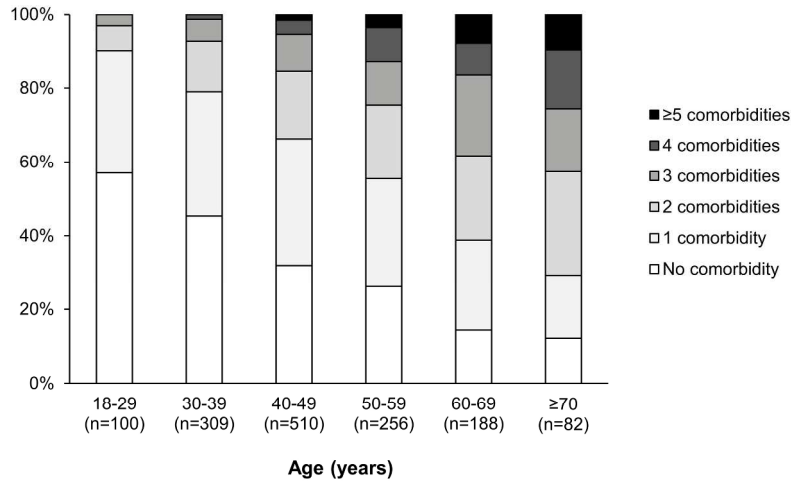

B) Type of chronic comorbidities by age group

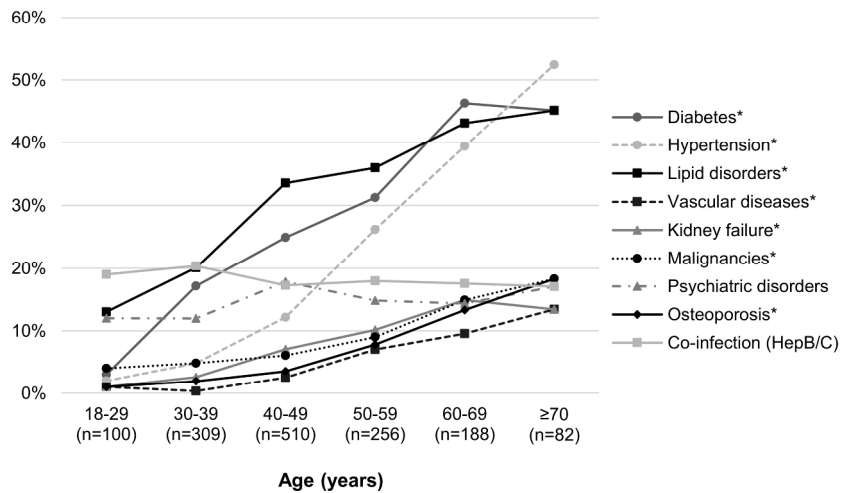

Number and type of chronic comorbidities by age group. Note: \* indicates p <0.0001 under the Cochran-Armitage trend test.

218x294mm (300 x 300 DPI)

A) Number of co-medications by age group

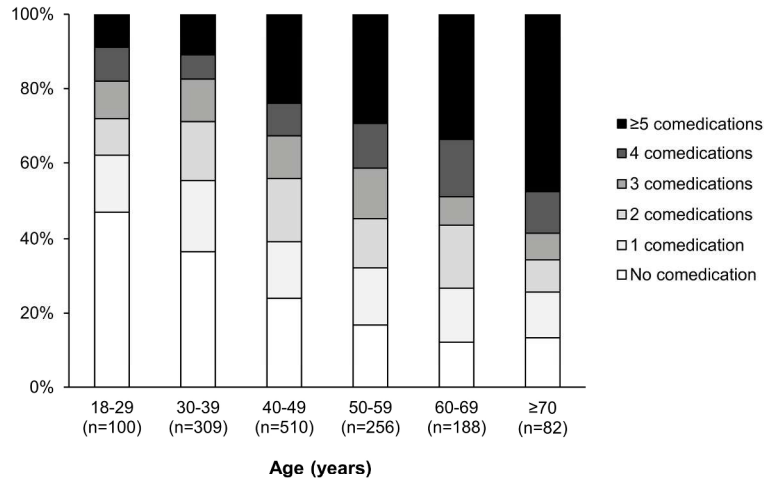

B) Type of co-medications by age group

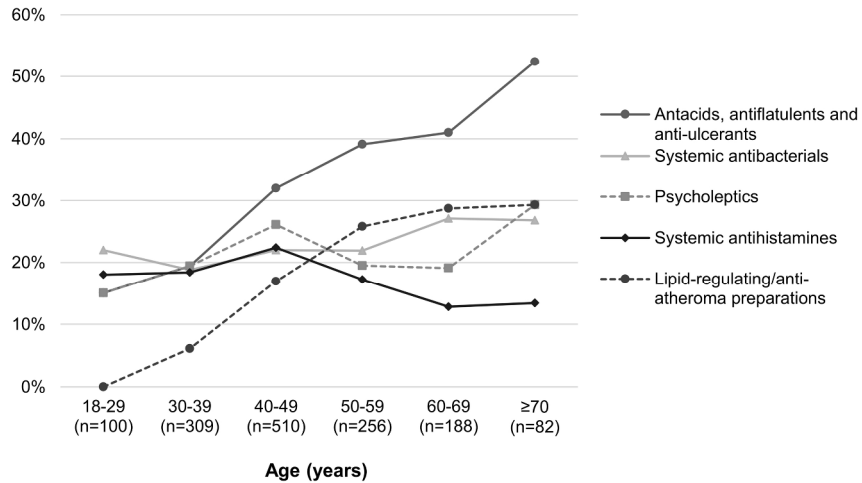

Number and type of co-medications prescribed by age group. Figure 3B shows the top five common co-medications in this study.

223x288mm (300 x 300 DPI)



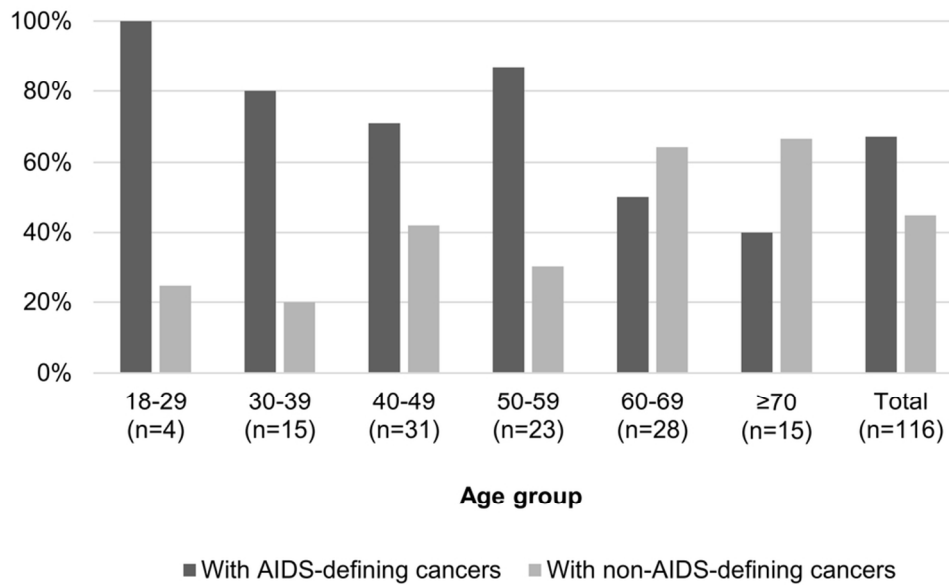

Proportions of studied patients with AIDS-defining cancers and non-AIDS-defining cancers among patients with any malignancies within each age group

90x57mm (300 x 300 DPI)

**The RECORD statement – checklist of items, extended from the STROBE statement, that should be reported in observational studies using routinely collected health data.**

|                           | Item No. | STROBE items                                                                                                                                                                               | Location in manuscript where items are reported | RECORD items                                                                                                                                                                                                                                                                                                                                                                                                                                | Location in manuscript where items are reported |
|---------------------------|----------|--------------------------------------------------------------------------------------------------------------------------------------------------------------------------------------------|-------------------------------------------------|---------------------------------------------------------------------------------------------------------------------------------------------------------------------------------------------------------------------------------------------------------------------------------------------------------------------------------------------------------------------------------------------------------------------------------------------|-------------------------------------------------|
| <b>Title and abstract</b> |          |                                                                                                                                                                                            |                                                 |                                                                                                                                                                                                                                                                                                                                                                                                                                             |                                                 |
|                           | 1        | (a) Indicate the study's design with a commonly used term in the title or the abstract (b) Provide in the abstract an informative and balanced summary of what was done and what was found | Page 3–4                                        | RECORD 1.1: The type of data used should be specified in the title or abstract. When possible, the name of the databases used should be included.<br><br>RECORD 1.2: If applicable, the geographic region and timeframe within which the study took place should be reported in the title or abstract.<br><br>RECORD 1.3: If linkage between databases was conducted for the study, this should be clearly stated in the title or abstract. | Page 3<br><br>Page 3<br><br>N/A                 |
| <b>Introduction</b>       |          |                                                                                                                                                                                            |                                                 |                                                                                                                                                                                                                                                                                                                                                                                                                                             |                                                 |
| Background rationale      | 2        | Explain the scientific background and rationale for the investigation being reported                                                                                                       | Page 7                                          |                                                                                                                                                                                                                                                                                                                                                                                                                                             |                                                 |
| Objectives                | 3        | State specific objectives, including any prespecified hypotheses                                                                                                                           | Page 7                                          |                                                                                                                                                                                                                                                                                                                                                                                                                                             |                                                 |
| <b>Methods</b>            |          |                                                                                                                                                                                            |                                                 |                                                                                                                                                                                                                                                                                                                                                                                                                                             |                                                 |
| Study Design              | 4        | Present key elements of study design early in the paper                                                                                                                                    | Page 8                                          |                                                                                                                                                                                                                                                                                                                                                                                                                                             |                                                 |
| Setting                   | 5        | Describe the setting, locations, and relevant dates, including periods of recruitment, exposure, follow-up, and data collection                                                            | Page 9–10                                       |                                                                                                                                                                                                                                                                                                                                                                                                                                             |                                                 |
| Participants              | 6        | (a) <i>Cohort study</i> - Give the eligibility criteria, and the                                                                                                                           | Page 9–10                                       | RECORD 6.1: The methods of study population selection (such as codes or                                                                                                                                                                                                                                                                                                                                                                     | Page 9–10                                       |

|                              |    |                                                                                                                                                                                                                                                                                                                                                                                                                                                                                                                                                                                                                                                             |            |                                                                                                                                                                                                                                                                                                                                                                                                                                                                                                                                                                                                                              |                       |
|------------------------------|----|-------------------------------------------------------------------------------------------------------------------------------------------------------------------------------------------------------------------------------------------------------------------------------------------------------------------------------------------------------------------------------------------------------------------------------------------------------------------------------------------------------------------------------------------------------------------------------------------------------------------------------------------------------------|------------|------------------------------------------------------------------------------------------------------------------------------------------------------------------------------------------------------------------------------------------------------------------------------------------------------------------------------------------------------------------------------------------------------------------------------------------------------------------------------------------------------------------------------------------------------------------------------------------------------------------------------|-----------------------|
|                              |    | <p>sources and methods of selection of participants. Describe methods of follow-up</p> <p><i>Case-control study</i> - Give the eligibility criteria, and the sources and methods of case ascertainment and control selection. Give the rationale for the choice of cases and controls</p> <p><i>Cross-sectional study</i> - Give the eligibility criteria, and the sources and methods of selection of participants</p> <p>(b) <i>Cohort study</i> - For matched studies, give matching criteria and number of exposed and unexposed</p> <p><i>Case-control study</i> - For matched studies, give matching criteria and the number of controls per case</p> | <p>N/A</p> | <p>algorithms used to identify subjects) should be listed in detail. If this is not possible, an explanation should be provided.</p> <p>RECORD 6.2: Any validation studies of the codes or algorithms used to select the population should be referenced. If validation was conducted for this study and not published elsewhere, detailed methods and results should be provided.</p> <p>RECORD 6.3: If the study involved linkage of databases, consider use of a flow diagram or other graphical display to demonstrate the data linkage process, including the number of individuals with linked data at each stage.</p> | <p>N/A</p> <p>N/A</p> |
| Variables                    | 7  | Clearly define all outcomes, exposures, predictors, potential confounders, and effect modifiers. Give diagnostic criteria, if applicable.                                                                                                                                                                                                                                                                                                                                                                                                                                                                                                                   | Page 11–12 | RECORD 7.1: A complete list of codes and algorithms used to classify exposures, outcomes, confounders, and effect modifiers should be provided. If these cannot be reported, an explanation should be provided.                                                                                                                                                                                                                                                                                                                                                                                                              | Page 11–12            |
| Data sources/<br>measurement | 8  | For each variable of interest, give sources of data and details of methods of assessment (measurement). Describe comparability of assessment methods if there is more than one group                                                                                                                                                                                                                                                                                                                                                                                                                                                                        | Page 10    |                                                                                                                                                                                                                                                                                                                                                                                                                                                                                                                                                                                                                              |                       |
| Bias                         | 9  | Describe any efforts to address potential sources of bias                                                                                                                                                                                                                                                                                                                                                                                                                                                                                                                                                                                                   | Page 10    |                                                                                                                                                                                                                                                                                                                                                                                                                                                                                                                                                                                                                              |                       |
| Study size                   | 10 | Explain how the study size was                                                                                                                                                                                                                                                                                                                                                                                                                                                                                                                                                                                                                              | Page 9–10  |                                                                                                                                                                                                                                                                                                                                                                                                                                                                                                                                                                                                                              |                       |

|                                                                                                                                           |                                  |            |                                                                                                                                                                                                                                                                                                                                                                                                                                                                                                                                                                      |                                                     |                                                                                                                                                                                                                                                              |
|-------------------------------------------------------------------------------------------------------------------------------------------|----------------------------------|------------|----------------------------------------------------------------------------------------------------------------------------------------------------------------------------------------------------------------------------------------------------------------------------------------------------------------------------------------------------------------------------------------------------------------------------------------------------------------------------------------------------------------------------------------------------------------------|-----------------------------------------------------|--------------------------------------------------------------------------------------------------------------------------------------------------------------------------------------------------------------------------------------------------------------|
|                                                                                                                                           |                                  | arrived at |                                                                                                                                                                                                                                                                                                                                                                                                                                                                                                                                                                      |                                                     |                                                                                                                                                                                                                                                              |
| 1<br>2<br>3<br>4<br>5<br>6                                                                                                                | Quantitative variables           | 11         | Explain how quantitative variables were handled in the analyses. If applicable, describe which groupings were chosen, and why                                                                                                                                                                                                                                                                                                                                                                                                                                        | Page 13                                             |                                                                                                                                                                                                                                                              |
| 7<br>8<br>9<br>10<br>11<br>12<br>13<br>14<br>15<br>16<br>17<br>18<br>19<br>20<br>21<br>22<br>23<br>24<br>25<br>26<br>27<br>28<br>29<br>30 | Statistical methods              | 12         | (a) Describe all statistical methods, including those used to control for confounding<br>(b) Describe any methods used to examine subgroups and interactions<br>(c) Explain how missing data were addressed<br>(d) <i>Cohort study</i> - If applicable, explain how loss to follow-up was addressed<br><i>Case-control study</i> - If applicable, explain how matching of cases and controls was addressed<br><i>Cross-sectional study</i> - If applicable, describe analytical methods taking account of sampling strategy<br>(e) Describe any sensitivity analyses | Page 13<br><br>N/A<br><br>N/A<br><br>N/A<br><br>N/A |                                                                                                                                                                                                                                                              |
| 31<br>32<br>33<br>34<br>35<br>36<br>37<br>38<br>39<br>40<br>41                                                                            | Data access and cleaning methods |            | ..                                                                                                                                                                                                                                                                                                                                                                                                                                                                                                                                                                   |                                                     | RECORD 12.1: Authors should describe the extent to which the investigators had access to the database population used to create the study population.<br><br>RECORD 12.2: Authors should provide information on the data cleaning methods used in the study. |
| 42<br>43<br>44<br>45<br>46<br>47                                                                                                          | Linkage                          |            | ..                                                                                                                                                                                                                                                                                                                                                                                                                                                                                                                                                                   |                                                     | RECORD 12.3: State whether the study included person-level, institutional-                                                                                                                                                                                   |

|                  |    |                                                                                                                                                                                                                                                                                                                                                 |                                   |                                                                                                                                                                                                                                                                                                                    |         |
|------------------|----|-------------------------------------------------------------------------------------------------------------------------------------------------------------------------------------------------------------------------------------------------------------------------------------------------------------------------------------------------|-----------------------------------|--------------------------------------------------------------------------------------------------------------------------------------------------------------------------------------------------------------------------------------------------------------------------------------------------------------------|---------|
|                  |    |                                                                                                                                                                                                                                                                                                                                                 |                                   | level, or other data linkage across two or more databases. The methods of linkage and methods of linkage quality evaluation should be provided.                                                                                                                                                                    |         |
| <b>Results</b>   |    |                                                                                                                                                                                                                                                                                                                                                 |                                   |                                                                                                                                                                                                                                                                                                                    |         |
| Participants     | 13 | (a) Report the numbers of individuals at each stage of the study ( <i>e.g.</i> , numbers potentially eligible, examined for eligibility, confirmed eligible, included in the study, completing follow-up, and analysed)<br>(b) Give reasons for non-participation at each stage.<br>(c) Consider use of a flow diagram                          | Page 14<br><br>Page 14<br><br>N/A | RECORD 13.1: Describe in detail the selection of the persons included in the study ( <i>i.e.</i> , study population selection) including filtering based on data quality, data availability and linkage. The selection of included persons can be described in the text and/or by means of the study flow diagram. | Page 14 |
| Descriptive data | 14 | (a) Give characteristics of study participants ( <i>e.g.</i> , demographic, clinical, social) and information on exposures and potential confounders<br>(b) Indicate the number of participants with missing data for each variable of interest<br>(c) <i>Cohort study</i> - summarise follow-up time ( <i>e.g.</i> , average and total amount) | Page 14–15<br><br>N/A<br><br>N/A  |                                                                                                                                                                                                                                                                                                                    |         |
| Outcome data     | 15 | <i>Cohort study</i> - Report numbers of outcome events or summary measures over time<br><i>Case-control study</i> - Report numbers in each exposure category, or summary measures of exposure<br><i>Cross-sectional study</i> - Report numbers of outcome events or summary measures                                                            | Page 15, 17                       |                                                                                                                                                                                                                                                                                                                    |         |
| Main results     | 16 | (a) Give unadjusted estimates                                                                                                                                                                                                                                                                                                                   | Page 15–18                        |                                                                                                                                                                                                                                                                                                                    |         |

1  
2  
3  
4  
5  
6  
7  
8  
9  
10  
11  
12  
13  
14  
15  
16  
17  
18  
19  
20  
21  
22  
23  
24  
25  
26  
27  
28  
29  
30  
31  
32  
33  
34  
35  
36  
37  
38  
39  
40  
41  
42  
43  
44  
45  
46  
47

|                   |    |                                                                                                                                                                                                                                                                                                                                                                                   |                |                                                                                                                                                                                                                                                                                                          |            |
|-------------------|----|-----------------------------------------------------------------------------------------------------------------------------------------------------------------------------------------------------------------------------------------------------------------------------------------------------------------------------------------------------------------------------------|----------------|----------------------------------------------------------------------------------------------------------------------------------------------------------------------------------------------------------------------------------------------------------------------------------------------------------|------------|
|                   |    | and, if applicable, confounder-adjusted estimates and their precision (e.g., 95% confidence interval). Make clear which confounders were adjusted for and why they were included<br>(b) Report category boundaries when continuous variables were categorized<br>(c) If relevant, consider translating estimates of relative risk into absolute risk for a meaningful time period | N/A<br><br>N/A |                                                                                                                                                                                                                                                                                                          |            |
| Other analyses    | 17 | Report other analyses done—e.g., analyses of subgroups and interactions, and sensitivity analyses                                                                                                                                                                                                                                                                                 | N/A            |                                                                                                                                                                                                                                                                                                          |            |
| <b>Discussion</b> |    |                                                                                                                                                                                                                                                                                                                                                                                   |                |                                                                                                                                                                                                                                                                                                          |            |
| Key results       | 18 | Summarise key results with reference to study objectives                                                                                                                                                                                                                                                                                                                          | Page 20        |                                                                                                                                                                                                                                                                                                          |            |
| Limitations       | 19 | Discuss limitations of the study, taking into account sources of potential bias or imprecision. Discuss both direction and magnitude of any potential bias                                                                                                                                                                                                                        | Page 23–24     | RECORD 19.1: Discuss the implications of using data that were not created or collected to answer the specific research question(s). Include discussion of misclassification bias, unmeasured confounding, missing data, and changing eligibility over time, as they pertain to the study being reported. | Page 23–24 |
| Interpretation    | 20 | Give a cautious overall interpretation of results considering objectives, limitations, multiplicity of analyses, results from similar studies, and other relevant evidence                                                                                                                                                                                                        | Page 25        |                                                                                                                                                                                                                                                                                                          |            |
| Generalisability  | 21 | Discuss the generalisability (external validity) of the study results                                                                                                                                                                                                                                                                                                             | Page 23–24     |                                                                                                                                                                                                                                                                                                          |            |

| Other Information                                         |    |                                                                                                                                                               |                         |                                                                                                                                                          |                         |
|-----------------------------------------------------------|----|---------------------------------------------------------------------------------------------------------------------------------------------------------------|-------------------------|----------------------------------------------------------------------------------------------------------------------------------------------------------|-------------------------|
| Funding                                                   | 22 | Give the source of funding and the role of the funders for the present study and, if applicable, for the original study on which the present article is based | <a href="#">Page 26</a> |                                                                                                                                                          |                         |
| Accessibility of protocol, raw data, and programming code |    | ..                                                                                                                                                            |                         | RECORD 22.1: Authors should provide information on how to access any supplemental information such as the study protocol, raw data, or programming code. | <a href="#">Page 26</a> |

\*Reference: Benchimol EI, Smeeth L, Guttman A, Harron K, Moher D, Petersen I, Sørensen HT, von Elm E, Langan SM, the RECORD Working Committee. The REporting of studies Conducted using Observational Routinely-collected health Data (RECORD) Statement. *PLoS Medicine* 2015; in press.

\*Checklist is protected under Creative Commons Attribution ([CC BY](#)) license.

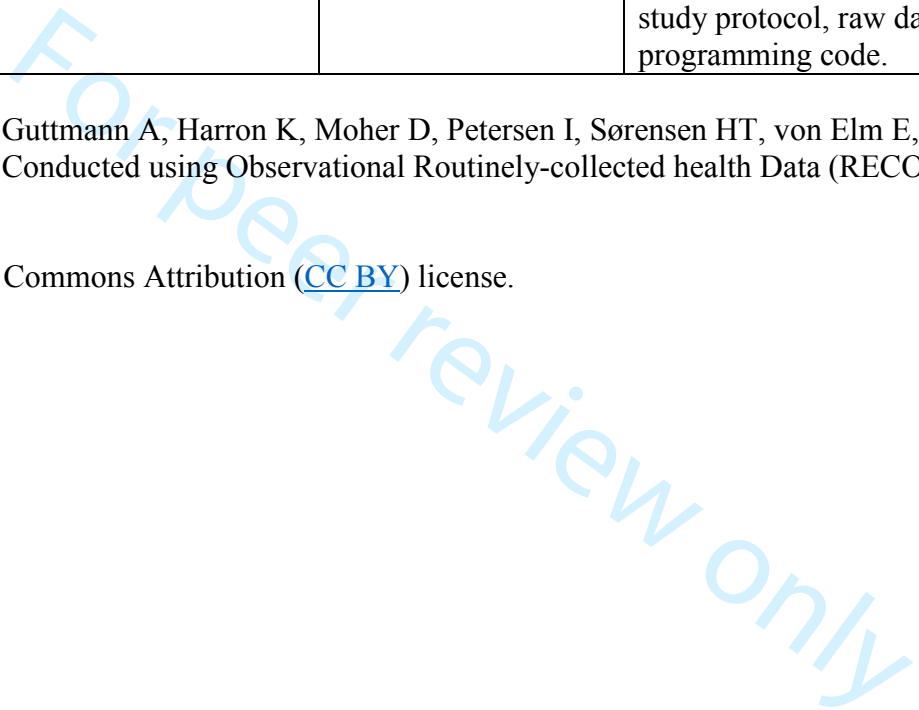

# BMJ Open

## Comorbidities and the use of co-medications in people living with HIV on antiretroviral therapy in Japan: a cross-sectional study using a hospital claims database

|                                 |                                                                                                                                                                                                                                        |
|---------------------------------|----------------------------------------------------------------------------------------------------------------------------------------------------------------------------------------------------------------------------------------|
| Journal:                        | <i>BMJ Open</i>                                                                                                                                                                                                                        |
| Manuscript ID                   | bmjopen-2017-019985.R2                                                                                                                                                                                                                 |
| Article Type:                   | Research                                                                                                                                                                                                                               |
| Date Submitted by the Author:   | 26-Apr-2018                                                                                                                                                                                                                            |
| Complete List of Authors:       | Ruzicka, Daniel; MSD K.K., Medical Affairs<br>Imai, Kentaro; Merck & Co., Inc., Oncology Clinical Development<br>Takahashi, Kenichi; MSD K.K., Japan Development<br>Naito, Toshio; Juntendo University, Department of General Medicine |
| <b>Primary Subject Heading</b>: | HIV/AIDS                                                                                                                                                                                                                               |
| Secondary Subject Heading:      | Infectious diseases                                                                                                                                                                                                                    |
| Keywords:                       | INFECTIOUS DISEASES, HIV & AIDS < INFECTIOUS DISEASES, Epidemiology < INFECTIOUS DISEASES                                                                                                                                              |
|                                 |                                                                                                                                                                                                                                        |

SCHOLARONE™  
Manuscripts



1  
2  
3  
4  
5  
6 [Title Page]  
7

8 **Title:**  
9

10  
11 **Comorbidities and the use of co-medications in people living with HIV on**  
12  
13  
14 **antiretroviral therapy in Japan: a cross-sectional study using a hospital claims**  
15  
16 **database**  
17  
18  
19  
20  
21  
22

23 **Authors and affiliations:**  
24

25 Daniel J. Ruzicka<sup>1</sup>; Kentaro Imai<sup>2</sup>; Kenichi Takahashi<sup>3</sup>; Toshio Naito<sup>4</sup>  
26  
27  
28  
29  
30

31 <sup>1</sup> Medical Affairs, MSD K.K., Tokyo, Japan  
32  
33

34 <sup>2</sup> Oncology Clinical Development, Merck & Co., Inc., Kenilworth, New Jersey, USA  
35  
36

37 <sup>3</sup> Japan Development, MSD K.K., Tokyo, Japan  
38  
39

40 <sup>4</sup> Department of General Medicine, Juntendo University, Tokyo, Japan  
41  
42  
43  
44

45 **Corresponding author:**  
46

47  
48 Daniel J. Ruzicka  
49

50  
51 Medical Affairs, MSD K.K.  
52

53  
54 Kitanomaru Square, 1-13-12 Kudan-kita, Chiyoda-ku, Tokyo 102-8667, Japan  
55  
56  
57  
58  
59  
60

1  
2  
3  
4  
5  
6 Tel.: +81-3-6272-1681, E-mail: daniel.ruzicka@merck.com  
7  
8  
9  
10

11 **Word count:** 3777 words  
12  
13  
14  
15  
16  
17  
18  
19  
20  
21  
22  
23  
24  
25  
26  
27  
28  
29  
30  
31  
32  
33  
34  
35  
36  
37  
38  
39  
40  
41  
42  
43  
44  
45  
46  
47  
48  
49  
50  
51  
52  
53  
54  
55  
56  
57  
58  
59  
60

For peer review only

1  
2  
3  
4  
5  
6 **ABSTRACT** (283/300 words)  
7

8 **Objectives:** To investigate the prevalence of chronic comorbidities and the use of  
9  
10  
11 co-medications in people living with HIV (PLWH) and on antiretrovirals in Japan, by  
12  
13  
14 using a hospital claims database.  
15

16  
17 **Design:** Observational, retrospective, cross-sectional study.  
18

19  
20 **Setting:** A hospital claims database of Japanese hospitals that have advanced medical  
21  
22 treatment capabilities (i.e., advanced treatment hospitals, general hospitals, acute care  
23  
24 hospitals), which include those providing acute and chronic care (excluding nursing  
25  
26 homes or hospices).  
27  
28  
29

30  
31 **Participants:** A total of 1445 PLWH aged  $\geq 18$  years and with a prescription record of  
32  
33 antiretrovirals between January 2010 and December 2015 were identified from the  
34  
35 database.  
36  
37  
38

39  
40 **Outcome measures:** The number and types of chronic comorbidities, as well as the  
41  
42 number and types of co-medications, in different age groups of the PLWH.  
43  
44

45  
46 **Results:** The median (range) age of patients was 45 (18–90) years, and 90.4% were  
47  
48 men. Of the 1445 patients, 972 (67.3%) had at least one chronic comorbidity. Common  
49  
50 chronic comorbidities included lipid disorders (31.6%), diabetes (26.8%), hypertension  
51  
52 (18.2%), and hepatitis B/C co-infection (18.2%). Patients in the older age groups had  
53  
54  
55  
56  
57  
58  
59  
60

1  
2  
3  
4  
5  
6 greater numbers of chronic comorbidities. The most common chronic comorbidities in  
7  
8 the older age groups were hypertension, diabetes, and lipid disorders. The majority of  
9  
10 patients used at least one co-medication, and those in the older age groups used greater  
11  
12 numbers of co-medications. The most common therapeutic category of co-medication  
13  
14 included antacids, antiflatulents, and antiulcerants (31.7%). Of 151 malignancies  
15  
16 reported in 117 patients, 84 were AIDS-defining cancers, and 67 were  
17  
18 non-AIDS-defining cancers.  
19  
20  
21  
22  
23  
24

25 **Conclusions:** Chronic comorbidities and co-medications were common among PLWH  
26  
27 in Japan taking antiretrovirals; Particularly among older patients, who more frequently  
28  
29 used co-medications. This suggests the need for giving special attention to the  
30  
31 appropriate management of this patient population.  
32  
33  
34  
35  
36  
37  
38  
39

#### 40 **Strengths and limitations of this study**

- 41 ● This is the first study to examine chronic comorbidities and co-medications in  
42  
43 PLWH in Japan taking antiretrovirals, using a large-scale hospital claims database.  
44  
45
- 46 ● Patients were stratified into small age groups, which provided a clear picture of  
47  
48 patients' comorbidity and co-medication profiles by age.  
49  
50  
51  
52  
53  
54  
55  
56  
57  
58  
59  
60

- The cross-sectional study design prevented inference of causality between HIV infection and chronic comorbidities or co-medications.
- This study has limitations inherent in the use of a hospital claims database, such as poorly recorded or missing information, which may result in misclassification.
- The generalizability of the study results may be limited because data contained in the database were collected from Japanese hospitals that can provide advanced medical treatment to patients, not from all the hospitals providing HIV treatment in Japan.

[Text]

## INTRODUCTION

Improvements in antiretroviral therapy (ART) over the last 15–20 years have prolonged the life expectancy of people living with HIV (PLWH). Life expectancy of PLWH is now reportedly similar to that of people without HIV.[1] However, in addition to HIV-related conditions, age-associated chronic comorbidities negatively affect the mortality rates of PLWH, as shown in various studies.[2-6] Considering their extended lifespans, some chronic comorbidities among older PLWH may be partly attributed to normal age-related changes in physiological functioning,[7] as with older people in general. Moreover, a longer duration of ART, which leads to increased toxicity, and HIV-induced persistent immunodeficiency and inflammation may also contribute to the increased number of comorbidities or higher prevalence of certain comorbidities among older PLWH.[8-11] Chronic inflammation and immune system changes by HIV infection were also found potentially involved in the mechanisms for possible premature ageing in PLWH.[12]

Studies have shown that over half of all HIV deaths are caused either by co-infection or age-associated non-infectious chronic comorbidities, including vascular diseases, hypertension, lipid disorders, diabetes mellitus, kidney diseases, malignancies,

1  
2  
3  
4  
5  
6 and bone disorders.[13, 14] Such age-associated chronic comorbidities in PLWH have  
7  
8 presented a new challenge for HIV treatment, especially in an ageing society such as  
9  
10  
11 Japan, which is among the countries with the longest life expectancy, for both  
12  
13  
14 sexes.[15] In Japan, more than 10% of newly diagnosed people with HIV in 2015 were  
15  
16 aged  $\geq 50$  years,[16] indicating a number of PLWH are relatively older. Although the  
17  
18 majority of newly diagnosed people with HIV were aged 20–49 years (88.2%),[16]  
19  
20 these people are also able to live to old age through appropriate management with  
21  
22 antiretrovirals. Thus, in line with the trends in other countries, in which the proportions  
23  
24 of PLWH aged  $\geq 50$  years have increased,[17] the number of older PLWH may also be  
25  
26 increasing in Japan. Because of the potentially long lifespans of PLWH in Japan, it is  
27  
28 important to obtain real-world data regarding the comorbidity profiles of these people.  
29  
30  
31  
32  
33  
34  
35

36  
37 Despite the importance of the association of chronic comorbidities with  
38  
39 mortality rates among PLWH, only a few small studies on chronic comorbidities among  
40  
41 PLWH in Japan have been published to date,[18, 19] and there have been no large  
42  
43 multi-centre epidemiological studies of chronic comorbidities in this population.  
44  
45  
46 Therefore in this study, to better understand a patient population, we examined the  
47  
48 frequency and type of chronic comorbidities of interest and the use of co-medications in  
49  
50  
51  
52  
53  
54  
55  
56  
57  
58  
59  
60

1  
2  
3  
4  
5  
6 different age groups of PLWH in Japan taking antiretrovirals and who were aged  $\geq 18$   
7  
8 years, using a Japanese hospital claims database.  
9

## 10 11 12 13 14 **METHODS**

### 15 16 17 **Study design**

18  
19 This was an observational, retrospective, cross-sectional database study. Study  
20  
21 data were extracted from a hospital claims database of acute care hospitals in Japan,  
22  
23 compiled by Medical Data Vision Co., Ltd. (MDV, Tokyo, Japan). This  
24  
25 electronic-record-based hospital claims database contained information from  
26  
27 approximately 17 million patients in 288 acute care hospitals (as of January 2017) in  
28  
29 Japan ([https://www.mdv.co.jp/press/2017/detail\\_743.html](https://www.mdv.co.jp/press/2017/detail_743.html)); accounting for  
30  
31 approximately 17% of all acute care hospitals in Japan that use the diagnosis procedure  
32  
33 combination/per-diem payment system. It should be noted, however, that “acute care  
34  
35 hospitals” included in this database are not merely acute care-only or emergency  
36  
37 hospitals. It describes hospitals with advanced medical treatment capabilities (i.e.,  
38  
39 advanced treatment hospitals, general hospitals, acute care hospitals), so that hospitals  
40  
41 providing both acute and chronic care (excluding nursing homes or hospices) are also  
42  
43 included in the database. Because this terminology is highly specific to Japan, it may be  
44  
45  
46  
47  
48  
49  
50  
51  
52  
53  
54  
55  
56  
57  
58  
59  
60



1  
2  
3  
4  
5  
6 confusing for readers outside Japan or not familiar with the MDV database. Therefore,  
7  
8 we refer to these hospitals included simply as “hospitals” hereinafter. We used this  
9  
10 database because in Japan PLWH usually receive treatment at regional hospitals for  
11  
12 HIV/AIDS treatment, and such designated hospitals are generally large and provide  
13  
14 advanced medical treatment for patients with acute and chronic diseases. The majority  
15  
16 of patients in the database are aged 15–64 years (51.5%), followed by  $\geq 65$  years  
17  
18 (34.2%) and 0–14 years (14.3%). The database contains both inpatient and outpatient  
19  
20 data from any department; these data include age, sex, department visited, date of  
21  
22 medical service, diagnosis codes, hospitalization (if any), medical procedures, and  
23  
24 prescriptions.  
25  
26  
27  
28  
29  
30  
31  
32  
33  
34  
35  
36

### 37 **Study population**

38  
39 People living with HIV, aged  $\geq 18$  years, with a diagnosis record of HIV, and  
40  
41 with a prescription record of antiretrovirals between January 2010 and December 2015  
42  
43 (study period) were included in the study. A person with any diagnosis record of HIV  
44  
45 was identified by the presence of at least one record of the International Classification  
46  
47 of Diseases 10th Revision (ICD-10) codes B20–24: HIV disease resulting in infectious  
48  
49 and parasitic diseases (B20), malignant neoplasms (B21), other specified diseases (B22),  
50  
51  
52  
53  
54  
55  
56  
57  
58  
59  
60

1  
2  
3  
4  
5  
6 other conditions (B23), and unspecified HIV disease (B24). The patients were required  
7  
8 to have at least one prescription record of any of the following antiretrovirals anytime  
9  
10 during the study period: nucleoside reverse transcriptase inhibitors (NRTIs),  
11  
12 non-nucleoside reverse transcriptase inhibitors (NNRTIs), protease inhibitors (PIs),  
13  
14 integrase strand transfer inhibitors (INSTIs), and entry inhibitors. This was for the  
15  
16 purpose of examining polypharmacy in PLWH that could induce a potential drug–drug  
17  
18 interaction (DDI) between antiretrovirals and co-medications, as well as to exclude  
19  
20 people with uncertain HIV status, such as those poorly recorded or intentionally  
21  
22 recorded for the purpose of a claim.  
23  
24  
25  
26  
27  
28  
29  
30

31 The data on patients who met these criteria (n=1445) during the study period  
32  
33 were extracted from the database. The patients were grouped based on their age at the  
34  
35 time of their last hospital visit, as follows: 18–29, 30–39, 40–49, 50–59, 60–69, and  $\geq 70$   
36  
37 years old.  
38  
39  
40  
41  
42  
43  
44

## 45 **Definitions of measures**

46  
47

48 The following patient data during the study period were extracted from the  
49  
50 database: demographic characteristics (age, sex), diagnoses of AIDS-defining conditions,  
51  
52 hospital admission, diagnoses of chronic comorbidities, prescriptions of antiretrovirals,  
53  
54  
55  
56  
57  
58  
59  
60

1  
2  
3  
4  
5  
6 and prescriptions of co-mediations.  
7

8  
9 The AIDS-defining conditions were identified using the ICD-10 codes, which  
10  
11 included the following: AIDS (B24); AIDS-related complex (B24); cytomegaloviral  
12  
13 disease (B20.2/B25 except for B25.1); candidiasis (B20.4/B37.1); encephalopathy  
14  
15 (B22.0); wasting syndrome (B22.2); coccidioidomycosis (B38.3–38.9); cryptococcosis  
16  
17 (B45.1–45.9); cryptosporidiosis (A07.2); herpes simplex infections (B00);  
18  
19 histoplasmosis (B39.3–39.9); isosporiasis (A07.3); pulmonary mycobacterial infection  
20  
21 (A31.0); tuberculosis (A15–19/B20.0); mycobacterial infections (A31.8);  
22  
23 pneumocystosis (B59, B20.6); recurrent pneumonia (J12–18/B01.2); progressive  
24  
25 multifocal leukoencephalopathy (A81.2); salmonella septicaemia (A02.1); toxoplasma  
26  
27 meningoencephalitis (B58.2); Burkitt lymphoma (B21.1/C83.7); Kaposi sarcoma  
28  
29 (B21.0/C46); non-Hodgkin lymphoma (B21.2/C82–85 except for C83.7/C91.5); and  
30  
31 cancer of the cervix uteri (C53).  
32  
33  
34  
35  
36  
37  
38  
39  
40  
41

42 The chronic comorbidities were identified by the presence of relevant ICD-10  
43  
44 codes for particular diseases defined below. If the code was recorded at least once  
45  
46 during the study period, the patients were considered to have that corresponding chronic  
47  
48 comorbidity. These codes are recorded as disease records when patients receive not only  
49  
50 diagnoses but also any medical procedures, treatment, or prescriptions for the disease.  
51  
52  
53  
54  
55  
56  
57  
58  
59  
60

1  
2  
3  
4  
5  
6 The chronic comorbidities in this study included type II diabetes (E11–14),  
7  
8 hypertension (I10–15, except for I11/I13), lipid disorders  
9  
10 (hypercholesterolaemia/hyperlipidaemia [E78.0–78.5]), vascular diseases (hypertensive  
11  
12 heart and renal diseases [I11/I13], angina pectoris [I20], myocardial infarction [I22],  
13  
14 stroke [I64]), kidney failure (N18–19), malignancies (B21.0–21.2/C00–97), psychiatric  
15  
16 disorders (dementia [F01/F03], psychosis [F20–29], mania and depression [F30–32],  
17  
18 anxiety [F40–41], insomnia [F51]), osteoporosis (M80–81), and hepatitis B/C  
19  
20 co-infection (B18). Presence of two or more chronic comorbidities in a patient was  
21  
22 defined as multimorbidity.  
23  
24  
25  
26  
27  
28  
29  
30

31 Although all malignancies were considered as one category of chronic  
32  
33 comorbidity, we classified malignancies into two groups to further analyse them in  
34  
35 terms of their types: (1) AIDS-defining cancers, defined as Burkitt lymphoma  
36  
37 (B21.1/C83.7), Kaposi sarcoma (B21.0/C46), non-Hodgkin lymphoma (B21.2/C82–85  
38  
39 except for C83.7/C91.5) and cancer of the cervix uteri (C53); and (2)  
40  
41 non-AIDS-defining cancers, defined as all other malignancies.  
42  
43  
44  
45  
46  
47

48 Co-medication was defined as a non-antiretroviral medication prescribed for  
49  
50 use for  $\geq 30$  days total during the study period. All medications other than antiretrovirals  
51  
52 were considered in accordance with classification based on the therapeutic subgroups  
53  
54  
55  
56  
57  
58  
59  
60

1  
2  
3  
4  
5  
6 (second level) of the Anatomical Therapeutic Chemical (ATC) codes.[20] To focus on  
7  
8 the medications probably used for chronic treatment, or at least used for many days,  
9  
10 instead of those used for only a short time, we set the minimum prescription days (i.e.,  
11  
12 total number of days for which the particular medication was supplied irrespective of  
13  
14 whether it was prescribed continuously or intermittently during the study period) as 30.  
15  
16  
17  
18  
19

20 All data on diseases and medications during the study period were considered  
21  
22 as data pertaining to the PLWH and thus were counted regardless of whether they were  
23  
24 recorded before or after the diagnosis record of HIV. This was because it was  
25  
26 considered from a clinical perspective that the comorbidities developed before the HIV  
27  
28 infection were persistent over the whole study period.  
29  
30  
31  
32  
33  
34  
35  
36

### 37 **Ethical statement**

38  
39 The requirement for informed consent was waived because this was an  
40  
41 observational study using de-identified claims data and the Japanese Ethical Guidelines  
42  
43 for Medical and Health Research Involving Human Subjects do not apply to a study  
44  
45 exclusively using de-identified data.  
46  
47  
48  
49  
50  
51  
52  
53

### 54 **Patient and public involvement**

1  
2  
3  
4  
5  
6 This was a hospital claims database study exclusively using pre-existing,  
7  
8 de-identified claims data, and patient recruitment was not carried out specifically for  
9  
10  
11 this study. Thus, no patient involvement existed in this study.  
12  
13  
14  
15

## 16 17 **Statistical analysis**

18  
19  
20 Demographic data were descriptively summarized using the median and range  
21  
22 for continuous variables or the number and percentage (%) of patients for categorical  
23  
24 variables. Chronic comorbidities and co-medications were descriptively summarized by  
25  
26 age group. The 95% confidence intervals (CIs) were calculated using the exact binomial  
27  
28 method proposed by Clopper and Pearson.[21] All statistical analyses were performed  
29  
30 using SAS 9.4 (SAS Institute Inc., Cary, NC, USA) software.  
31  
32  
33  
34  
35  
36  
37  
38  
39

## 40 **RESULTS**

### 41 42 **Patient characteristics**

43  
44  
45 Of 3155 patients with a diagnosis record of HIV, 1445 (45.8%) also had a  
46  
47 prescription record of antiretrovirals, and were therefore included in this study. They  
48  
49 had a median (range) age of 45 (18–90) years, and 90.4% were men (Table 1). Of these  
50  
51 patients, 915 (63.3%) had an AIDS-defining condition at some point during the study  
52  
53  
54  
55  
56  
57  
58  
59  
60

1  
2  
3  
4  
5  
6 period. The majority of patients (77.6%) had only outpatient data, and 22.4% had at  
7  
8 least one record of hospital admission for any reason during the study period (see  
9  
10 Supplementary Table 1 for a full list of non-AIDS-defining illnesses that led to hospital  
11  
12 admission in patients who had hospital admission only for non-AIDS-defining  
13  
14 conditions). Figure 1 shows the age and sex distribution of patients. The majority were  
15  
16 aged 40–49 years, followed by 30–39, 50–59, 60–69, 18–29 and  $\geq 70$  years.  
17  
18  
19  
20  
21  
22  
23  
24  
25

26 **Table 1. Demographic characteristics of studied people living with HIV (n=1445)**

|                                                    | Total<br>(n=1445) |
|----------------------------------------------------|-------------------|
|                                                    | n (%)             |
| Age (years), median (range)                        | 45 (18–90)        |
| Male                                               | 1306 (90.4)       |
| AIDS-defining conditions <sup>a</sup>              | 915 (63.3)        |
| Hospital admission <sup>b</sup>                    |                   |
| No                                                 | 1121 (77.6)       |
| Yes                                                | 324 (22.4)        |
| For an AIDS-defining condition <sup>c</sup>        | 120 (8.3)         |
| For non-AIDS-defining conditions only <sup>d</sup> | 196 (13.6)        |
| For unknown reason <sup>e</sup>                    | 8 (0.6)           |
| Chronic comorbidity                                |                   |
| Diabetes                                           | 387 (26.8)        |
| Hypertension                                       | 263 (18.2)        |
| Lipid disorders                                    | 456 (31.6)        |
| Vascular diseases                                  | 55 (3.8)          |
| Kidney failure                                     | 78 (5.4)          |
| Malignancies                                       | 117 (8.1)         |
| Psychiatric disorders                              | 219 (15.2)        |

|                                                     |             |
|-----------------------------------------------------|-------------|
| Osteoporosis                                        | 85 (5.9)    |
| Hepatitis B/C co-infection                          | 263 (18.2)  |
| Use of a non-antiretroviral medication <sup>f</sup> | 1086 (75.2) |
| Type of key drug among antiretrovirals              |             |
| INSTI                                               | 789 (54.8)  |
| NNRTI                                               | 359 (24.9)  |
| PI                                                  | 617 (42.8)  |

<sup>a</sup>Patients were considered to have an AIDS-defining condition if they had at least one disease record of AIDS-defining conditions during the study period. The only exception is for recurrent pneumonia; patients were considered to have recurrent pneumonia only when they had two or more codes of pneumonia (J12–18/B01.2) recorded within 18 months.

<sup>b</sup>Hospital admissions for any cause during the study period.

<sup>c</sup>Patients with at least one record of hospital admission and whose reason for admission included an AIDS-defining condition.

<sup>d</sup>Patients with at least one record of hospital admission and whose reason for admission was only non-AIDS-defining conditions.

<sup>e</sup>Patients with at least one record of hospital admission and whose reason for admission was unknown (i.e., no data available).

<sup>f</sup>Non-antiretroviral medication prescribed for use for  $\geq 30$  days total during the study period was taken into consideration.

INSTI, integrase strand transfer inhibitor; NNRTI, non-nucleoside reverse transcriptase inhibitor; PI, protease inhibitor.

## Chronic comorbidities

Overall, 1923 chronic comorbidities were reported in 972 (67.3%) PLWH, and 523 (36.2%) patients had multimorbidity (two or more chronic comorbidities). The most common chronic comorbidities were lipid disorders (31.6%; 95% CI, 29.2%–34.0%), followed by diabetes (26.8%; 95% CI, 24.5%–29.1%), hypertension (18.2%; 95% CI,



1  
2  
3  
4  
5  
6 16.2%–20.3%), and hepatitis B/C co-infection (18.2%; 95% CI, 16.2%–20.3%) (Table  
7  
8 1) (see Supplementary Table 2 for the breakdown of prevalence of each disease,  
9  
10  
11  
12 classified under vascular diseases and psychiatric disorders).

13  
14 Figure 2A shows the number of chronic comorbidities by age. Although 58.0%  
15  
16 (58/100) of patients aged 18–29 years had no chronic comorbidity, the proportions with  
17  
18 no chronic comorbidity decreased in the older age groups. More patients in the older  
19  
20 age groups had multimorbidity: 21.0% (65/309) of those aged 30–39 years, 44.1%  
21  
22 (113/256) of those aged 50–59 years, and 70.7% (58/82) of those aged  $\geq 70$  years. No  
23  
24 patients aged 18–29 years had four or more chronic comorbidities, while 24.4% (20/82)  
25  
26 of those aged  $\geq 70$  years did.  
27  
28  
29  
30  
31  
32

33  
34 Figure 2B shows the prevalence of different types of chronic comorbidities by  
35  
36 age group. The prevalence of most chronic comorbidities tended to be higher in the  
37  
38 older age groups, but such trends were not observed for psychiatric disorders  
39  
40 (prevalence range: 12.0%–17.8%;  $p=0.3271$ , Cochran–Armitage trend test) and  
41  
42 hepatitis B/C co-infection (17.1%–20.4%,  $p=0.4501$ , Cochran–Armitage trend test). The  
43  
44 most common chronic comorbidities in the older age groups were hypertension,  
45  
46 diabetes, and lipid disorders. Hypertension was the most common chronic comorbidity  
47  
48 in the  $\geq 70$ -year group (52.4%; 95% CI, 41.1%–63.6%), diabetes in the 60–69-year  
49  
50  
51  
52  
53  
54  
55  
56  
57  
58  
59  
60

1  
2  
3  
4  
5  
6 group (46.3%; 95% CI, 39.0%–53.7%), and lipid disorders in the 50–59-year group  
7  
8 (35.9%; 95% CI, 30.1%–42.1%). The prevalence of vascular diseases, kidney failure,  
9  
10 malignancies, or osteoporosis in the  $\geq 70$ -year group was 11.0%–18.3%, which was  
11  
12 approximately 10%–15% higher than its counterpart in the 18–29-year group (0%–  
13  
14 4.0%) ( $p < 0.0001$  for all four comorbidity types, Cochran–Armitage trend test).  
15  
16  
17  
18  
19  
20  
21  
22

### 23 **Co-medications**

24  
25 Of the 1445 PLWH, 1086 (75.2%) used at least one co-medication and 342  
26  
27 (23.7%) used five or more, apart from antiretrovirals. Figure 3A shows the number of  
28  
29 co-medications (excluding antiretrovirals) by age group. The proportions of patients  
30  
31 who used at least one co-medication were 53.0% (53/100) in the 18–29-year group,  
32  
33 76.1% (388/510) in the 40–49-year group, and 86.6% (71/82) in the  $\geq 70$ -year group.  
34  
35  
36  
37 More patients in the older age groups used greater numbers of co-medications: 11.0%  
38  
39 (34/309) of patients in the 30–39-year group, 29.3% (75/256) in the 50–59-year group,  
40  
41 and 47.6% (39/82) in the  $\geq 70$ -year group used five or more co-medications.  
42  
43  
44  
45  
46  
47

48 The 10 most common therapeutic categories were antacids, antiflatulents, and  
49  
50 antiulcerants (A02) (31.7%); systemic antibacterials (J01) (22.2%); psycholeptics (N05)  
51  
52 (22.0%); systemic antihistamines (R06) (18.5%); lipid-regulating/anti-atheroma  
53  
54  
55  
56  
57  
58  
59  
60

1  
2  
3  
4  
5  
6 preparations (C10) (17.2%); anti-inflammatory and anti-rheumatic products (M01)  
7  
8 (15.5%); antidiarrhoeals, oral electrolyte replacers, and intestinal anti-inflammatories  
9  
10 (A07) (12.1%); agents acting on the renin-angiotensin system (C09) (11.1%); vitamins  
11  
12 (A11) (10.2%); and cough and cold preparations (R05) (9.6%). Regarding the top five  
13  
14 most common co-medications, the proportions of patients who took respective  
15  
16 co-medications by age group are shown in Figure 3B. Antacids, antiflatulents, and  
17  
18 antiulcerants were the most common in most of the age groups, notably in the  $\geq 70$ -year  
19  
20 group (52.4%). The proportions of patients taking systemic antibacterials, psycholeptics,  
21  
22 or systemic antihistamines were similar across all age groups. Lipid-regulating agents  
23  
24 were used more commonly in the older age groups: notably in 25%–30% of patients  
25  
26 aged  $\geq 50$  years.  
27  
28  
29  
30  
31  
32  
33  
34  
35  
36  
37  
38  
39

## 40 **Malignancies**

41  
42 In this study, 151 malignancies were reported in 117 PLWH, including 84  
43  
44 AIDS-defining cancers and 67 non-AIDS-defining cancers. Figure 4 shows the  
45  
46 proportions of patients with AIDS-defining cancers and those of patients with  
47  
48 non-AIDS-defining cancers among patients with any malignancies within each age  
49  
50 group. The figure illustrates that AIDS-defining cancers were more common in people  
51  
52  
53  
54  
55  
56  
57  
58  
59  
60

<60 years old, whereas non-AIDS-defining cancers were more frequent in people aged  $\geq 60$  years. Table 2 shows the proportions of patients who had respective cancer types in these 117 PLWH with any malignancies. Non-Hodgkin lymphoma was the most common type of AIDS-defining cancer (52.1%), and bronchus or lung cancers were the most common types of non-AIDS-defining cancers (6.8%).

**Table 2. Proportions of studied patients with respective cancer types among people living with HIV who had any malignancies (n=117)**

|                                                             | Patients with malignancy<br>(n=117) |        |
|-------------------------------------------------------------|-------------------------------------|--------|
|                                                             | n                                   | (%)    |
| AIDS-defining cancer                                        |                                     |        |
| Non-Hodgkin lymphoma                                        | 61                                  | (52.1) |
| Kaposi sarcoma                                              | 16                                  | (13.7) |
| Burkitt lymphoma                                            | 5                                   | (4.3)  |
| Cervix uteri                                                | 2                                   | (1.7)  |
| Non-AIDS-defining cancer                                    |                                     |        |
| Bronchus or lung                                            | 8                                   | (6.8)  |
| Secondary malignant neoplasm of bone and bone marrow        | 6                                   | (5.1)  |
| Colon                                                       | 3                                   | (2.6)  |
| Breast                                                      | 3                                   | (2.6)  |
| Malignant neoplasm, without specification of site           | 3                                   | (2.6)  |
| Secondary malignant neoplasm of brain and cerebral meninges | 3                                   | (2.6)  |
| Acute myeloblastic leukaemia (AML)                          | 3                                   | (2.6)  |
| Multiple myeloma                                            | 3                                   | (2.6)  |
| Stomach                                                     | 2                                   | (1.7)  |
| Secondary malignant neoplasm of lung                        | 2                                   | (1.7)  |

|   |                             |           |
|---|-----------------------------|-----------|
| 1 |                             |           |
| 2 |                             |           |
| 3 |                             |           |
| 4 |                             |           |
| 5 | Liver cell carcinoma        | 2 (1.7)   |
| 6 | Sigmoid colon               | 2 (1.7)   |
| 7 | Thoracic part of oesophagus | 2 (1.7)   |
| 8 | Skin of trunk               | 2 (1.7)   |
| 9 | Others <sup>a</sup>         | 23 (19.7) |

12 <sup>a</sup>Non-AIDS-defining cancer types present only in one patient were grouped and  
13 presented as “others.”  
14  
15

## 21 DISCUSSION

22  
23  
24 This is the first study to investigate the prevalence of chronic comorbidities and  
25 the use of co-medications in PLWH in Japan taking antiretrovirals, using a large  
26 hospital claims database. The study found that chronic comorbidities were common in  
27 PLWH in Japan, particularly hypertension, diabetes, and lipid disorders among older  
28 patients. In terms of burden by age group, this study revealed that older patients had  
29 greater numbers of chronic comorbidities and also used greater numbers of  
30 co-medications than younger patients did.  
31  
32  
33  
34  
35  
36  
37  
38  
39  
40  
41  
42  
43

44 Greater numbers of comorbidities in older people with HIV were also reported  
45 in previous international studies.[2, 3, 22] Additionally, older people with HIV in  
46 Switzerland and the United States were more likely to have diabetes mellitus,  
47 cardiovascular diseases, non-AIDS-defining malignancies, osteoporosis, or liver  
48 diseases than younger patients.[3, 22] Similar to those studies, in the present study,  
49  
50  
51  
52  
53  
54  
55  
56  
57  
58  
59  
60

1  
2  
3  
4  
5  
6 diabetes mellitus, vascular diseases, and osteoporosis were more common in older  
7  
8 PLWH. Kidney failure was also more common in older patients, as suggested by a  
9  
10  
11 previous study reporting that both HIV infection and increased age were associated with  
12  
13  
14 an increased risk of kidney diseases in PLWH.[23] Previous studies also showed PLWH  
15  
16  
17 had a greater number of age-associated comorbidities at earlier ages than those living  
18  
19  
20 without HIV, suggesting premature ageing in PLWH.[2, 6] This is a topic we plan to  
21  
22  
23 examine in our future research using a control group of people without HIV.  
24

25  
26 Despite the decreased incidence of non-Hodgkin lymphoma and Kaposi  
27  
28 sarcoma, owing to antiretrovirals,[24, 25] AIDS-defining cancers remain a great  
29  
30  
31 concern in PLWH in North America.[26] However, in the present study, these cancers  
32  
33  
34 were not commonly observed (non-Hodgkin lymphoma, 4.2% [61/1445]; Kaposi  
35  
36  
37 sarcoma, 1.1% [16/1445]). Although direct comparison is not appropriate because of  
38  
39  
40 different study methods (i.e., different study populations, different antiretroviral eras),  
41  
42  
43 the prevalence was much lower than that reported in a previous Japanese study in which  
44  
45  
46 non-Hodgkin lymphoma and Kaposi sarcoma were present in 37.9% and 15.2%,  
47  
48  
49 respectively, of autopsied people with HIV and having received antiretrovirals from  
50  
51  
52 1985–2012.[27] Another interesting finding of the present study was that  
53  
54  
55 non-AIDS-defining cancers, which accounted for 44.4% of all malignancies, seemed  
56  
57  
58  
59  
60

1  
2  
3  
4  
5  
6 more frequent in patients in older age groups, being observed in >60% of PLWH aged  
7  
8  $\geq 60$  years who had any malignancies. A previous study showed that age-related cancers,  
9  
10 such as lung, prostate, colorectal, and breast cancers, were common among older  
11  
12 PLWH.[28] Another study also reported an increase in non-AIDS-defining cancers  
13  
14 among the HIV population as a consequence of ageing of the AIDS population.[24] In  
15  
16 light of these previous findings, our results highlight the importance of  
17  
18 non-AIDS-defining cancers among PLWH because of their extended lifespans.  
19  
20 However, in the present study it was difficult to illuminate any trends in the prevalence  
21  
22 of malignancies by age group because of the small number of patients with  
23  
24 malignancies. Thus, the prevalence of malignancies by age and cancer type should be  
25  
26 interpreted carefully, and examined further in future studies.  
27  
28  
29  
30  
31  
32  
33  
34  
35

36  
37 Our results indicated that use of co-medications was common among older  
38  
39 PLWH, although the proportions of patients with five or more co-medications in those  
40  
41 aged  $\geq 50$  years were smaller (33.7%) compared with a previous study (54%),[29]  
42  
43 suggesting the management of older PLWH may be complicated because of DDIs  
44  
45 attributed to increased use of co-medications.[30, 31] Moreover, in our study the use of  
46  
47 co-medications was common even in younger PLWH, and over half of patients aged  
48  
49 18–29 years used at least one co-medication. These results suggest the importance of  
50  
51  
52  
53  
54  
55  
56  
57  
58  
59  
60

1  
2  
3  
4  
5  
6 potential DDIs not only among the older PLWH but also the younger ones. For instance,  
7  
8 DDIs between PIs or NNRTIs and co-medications (e.g., cardiovascular agents,  
9  
10 anti-platelet agents, psychotropics, antidepressants, analgesics, and methadone) can be  
11  
12 common in PLWH.[30, 31] The common use of lipid-regulating agents and agents  
13  
14 acting on the renin-angiotensin system in the present study probably reflected the high  
15  
16 prevalence of lipid disorders and hypertension, especially in older patients, for some of  
17  
18 whom antiretrovirals may be partly responsible for changes in lipid metabolism,[32, 33]  
19  
20 although its underlying mechanisms in PLWH are complex. Psycholeptics were also  
21  
22 commonly used irrespective of age, which was consistent with previous studies,[30, 31]  
23  
24 and probably due to HIV disease progression and treatment with antiretrovirals  
25  
26 associated with psychiatric disorders.[34, 35] The most common use, of antacids,  
27  
28 antiflatulents, and antiulcerants (31.7%), may partly reflect the common presence of  
29  
30 gastric ulcers in hospitalized older Japanese patients,[36] although not all of our study  
31  
32 population had hospitalization. Because antacids can reduce serum concentrations of  
33  
34 several antiretrovirals by altering the acid environment,[37, 38] Japanese physicians  
35  
36 need to pay careful attention when prescribing antiretrovirals to patients using them.  
37  
38  
39  
40  
41  
42  
43  
44  
45  
46  
47  
48  
49  
50

51 The present study has some limitations. Because it was a cross-sectional study,  
52  
53 chronic comorbidities/co-medications were not examined against the timing of a  
54  
55  
56  
57  
58  
59  
60



1  
2  
3  
4  
5  
6 diagnosis of HIV infection. It should be noted that chronic  
7  
8 comorbidities/co-medications in this study included those coded before a diagnosis  
9  
10 record of HIV infection. This study is limited in its ability to draw valid conclusions  
11  
12 about possible causality between HIV infection and chronic  
13  
14 comorbidities/co-medications; therefore, causality should be confirmed through more  
15  
16 rigorous studies. Other limitations include those inherent to observational studies using  
17  
18 a hospital claims database, such as poorly recorded or missing information, which may  
19  
20 result in misclassification. For example, because the database is hospital-based,  
21  
22 medical/treatment history recorded at different hospitals could not be obtained, meaning  
23  
24 that patients may have received co-medications for other diseases at different hospitals.  
25  
26 Acute conditions may be missclassified into chronic comorbidities, as these were  
27  
28 defined only by the presence of one relevant ICD-10 code. Co-medications only for  
29  
30 treating acute condition may contaminate co-medications prescribed only for chronic  
31  
32 medical conditions, although medications prescribed for <30 days were excluded from  
33  
34 co-medications in this study. Additionally, the study results may not be generalizable to  
35  
36 the overall population living with HIV and taking antiretrovirals in Japan. This is  
37  
38 because PLWH in this database who require acute care at hospitals covered in the  
39  
40 database may be more ill than other PLWH who do not require acute care, or those who  
41  
42  
43  
44  
45  
46  
47  
48  
49  
50  
51  
52  
53  
54  
55  
56  
57  
58  
59  
60

1  
2  
3  
4  
5  
6 receive HIV treatment at non-acute care hospitals not covered in the database. In  
7  
8  
9 addition, the study results, particularly results on co-medications, may not accurately  
10  
11 represent comorbidity and co-medication profiles in the general population living with  
12  
13 HIV. This is because this study did not investigate these profiles for inpatients  
14  
15 separately from those for outpatients. Supplementary Table 3 shows co-medication lists  
16  
17 by patients with or without a hospital admission record during the study period.  
18  
19  
20 Co-medication results may also over-represent drugs used by PLWH who sought  
21  
22 hospital care, which may differ from those of PLWH who do not seek hospital care.  
23  
24  
25 HIV treatment choices in these included hospitals may not be representative of those  
26  
27 made in other hospitals (i.e., hospitals not providing advanced medical treatment). This  
28  
29 study excluded patients without a record of antiretrovirals, who represent PLWH not  
30  
31 taking antiretrovirals. However, we might have excluded some PLWH with  
32  
33 antiretroviral therapy because PLWH in this database may have received antiretrovirals  
34  
35 at hospitals not covered in the database. Finally, because detailed data regarding HIV  
36  
37 infection status were not available, we could not analyse the potential relationships  
38  
39 between chronic comorbidities and CD4 count, HIV-RNA, or ART duration.  
40  
41  
42  
43  
44  
45  
46  
47  
48  
49

50  
51 In conclusion, chronic comorbidities and co-medications were common among  
52  
53 PLWH in Japan taking antiretrovirals, especially among older patients, who more  
54  
55  
56  
57  
58  
59

1  
2  
3  
4  
5 frequently used co-medications. This suggests the need for special treatment and  
6  
7  
8 attention by physicians. Although our results, particularly the types of co-medications,  
9  
10  
11 may not necessarily be extrapolated to a different patient population, they will help  
12  
13  
14 remind Japanese physicians of the importance of being aware of such complicated  
15  
16  
17 medical profiles of PLWH, especially patients who seek treatment at a hospital, so as to  
18  
19  
20 treat these people while mindful of potential DDIs. Application of our results can  
21  
22  
23 support the development of optimal healthcare strategies for this growing population.  
24  
25  
26  
27  
28  
29  
30  
31  
32  
33  
34  
35  
36  
37  
38  
39  
40  
41  
42  
43  
44  
45  
46  
47  
48  
49  
50  
51  
52  
53  
54  
55  
56  
57  
58  
59  
60

## Acknowledgments

Medical writing and statistical supports were provided by Tetsumi Toyoda and Yuri Haga of Clinical Study Support, Inc. We are particularly grateful for the assistance given by Noriyo Ihara of MSD, K.K.

## Author contributions

DJR contributed to the study design. DJR, KI, and KT contributed to the data analysis and interpretation. DJR, KI, KT, and TN revised the manuscript draft critically and approved the final version of the manuscript to be published.

## Funding statement

This study was supported by MSD K.K., Tokyo, Japan.

## Competing interests statement

DJR, KI, and KT are employees of MSD K.K., Tokyo, Japan. TN has received no funding for this study but received lecture fees from MSD K.K., Tokyo, Japan.

## Data sharing statement

1  
2  
3  
4  
5  
6  
7  
8  
9  
10  
11  
12  
13  
14  
15  
16  
17  
18  
19  
20  
21  
22  
23  
24  
25  
26  
27  
28  
29  
30  
31  
32  
33  
34  
35  
36  
37  
38  
39  
40  
41  
42  
43  
44  
45  
46  
47  
48  
49  
50  
51  
52  
53  
54  
55  
56  
57  
58  
59  
60

No additional data are available.

For peer review only

## REFERENCES

1. Nakagawa F, May M, Phillips A. Life expectancy living with HIV: recent estimates and future implications. *Curr Opin Infect Dis* 2013;26:17–25.
2. Guaraldi G, Orlando G, Zona S, et al. Premature age-related comorbidities among HIV-infected persons compared with the general population. *Clin Infect Dis* 2011;53:1120–6.
3. Hasse B, Ledergerber B, Furrer H, et al. Morbidity and aging in HIV-infected persons: the Swiss HIV cohort study. *Clin Infect Dis* 2011;53:1130–9.
4. Wu PY, Chen MY, Hsieh SM, et al. Comorbidities among the HIV-infected patients aged 40 years or older in Taiwan. *PLOS ONE* 2014;9:e104945.
5. Vance DE, Mugavero M, Willig J, et al. Aging with HIV: a cross-sectional study of comorbidity prevalence and clinical characteristics across decades of life. *J Assoc Nurses AIDS Care* 2011;22:17–25.
6. Schouten J, Wit FW, Stolte IG, et al. Cross-sectional comparison of the prevalence of age-associated comorbidities and their risk factors between HIV-infected and uninfected individuals: the AGEhIV cohort study. *Clin Infect Dis* 2014;59:1787–97.

- 1  
2  
3  
4  
5  
6 7. Mangoni AA, Jackson SH. Age-related changes in pharmacokinetics and  
7  
8 pharmacodynamics: basic principles and practical applications. *Br J Clin*  
9  
10  
11 *Pharmacol* 2004;57:6–14.
- 12  
13  
14 8. Edelman EJ, Gordon KS, Glover J, et al. The next therapeutic challenge in HIV:  
15  
16 polypharmacy. *Drugs Aging* 2013;30:613–28.
- 17  
18  
19 9. Seaberg EC, Muñoz A, Lu M, et al. Association between highly active  
20  
21 antiretroviral therapy and hypertension in a large cohort of men followed from 1984  
22  
23 to 2003. *AIDS* 2005;19:953–60.
- 24  
25  
26  
27  
28 10. Deeks SG, Phillips AN. HIV infection, antiretroviral treatment, ageing, and  
29  
30 non-AIDS related morbidity. *BMJ* 2009;338:a3172.
- 31  
32  
33  
34 11. Deeks SG. HIV infection, inflammation, immunosenescence, and aging. *Annu Rev*  
35  
36 *Med* 2011;62:141–55.
- 37  
38  
39 12. Wing EJ. HIV and aging. *Int J Infect Dis* 2016;53:61–8.
- 40  
41  
42  
43 13. Weber R, Sabin CA, Friis-Møller N, et al. Liver-related deaths in persons infected  
44  
45 with the human immunodeficiency virus: the D:A:D study. *Arch Intern Med*  
46  
47  
48 2006;166:1632–41.
- 49  
50  
51  
52  
53  
54  
55  
56  
57  
58  
59  
60

- 1  
2  
3  
4  
5  
6 14. Sackoff JE, Hanna DB, Pfeiffer MR, et al. Causes of death among persons with  
7  
8 AIDS in the era of highly active antiretroviral therapy: New York City. *Ann Intern*  
9  
10 *Med* 2006;145:397–406.  
11  
12  
13  
14 15. Global Health Observatory (GHO) Data. World Health Organization (2016).  
15  
16 [http://www.who.int/gho/publications/world\\_health\\_statistics/2016/en/](http://www.who.int/gho/publications/world_health_statistics/2016/en/) (accessed 19  
17  
18 Mar 2017).  
19  
20  
21  
22 16. Trends in AIDS occurrence report (2015). In Japanese.  
23  
24 [http://api-net.jfap.or.jp/status/2015/15nenpo/15nenpo\\_menu.html](http://api-net.jfap.or.jp/status/2015/15nenpo/15nenpo_menu.html) (Accessed 19  
25  
26 Mar 2017).  
27  
28  
29  
30 17. Costagliola D. Demographics of HIV and aging. *Curr Opin HIV AIDS* 2014;9:294–  
31  
32 301.  
33  
34  
35  
36 18. Yanagimoto S, Yotsuyanagi H, Kikuchi Y, et al. Chronic hepatitis B in patients  
37  
38 coinfecting with human immunodeficiency virus in Japan: a retrospective  
39  
40 multicenter analysis. *J Infect Chemother* 2012;18:883–90.  
41  
42  
43  
44 19. Yanagisawa N, Ando M, Ajisawa A, et al. Clinical characteristics of kidney disease  
45  
46 in Japanese HIV-infected patients. *Nephron Clin Pract* 2011;118:c285–91.  
47  
48  
49  
50 20. EphMRA. EphMRA Anatomical Classification Guidelines.  
51  
52 [http://www.ephmra.org/user\\_uploads/atcguidelines2016final.pdf](http://www.ephmra.org/user_uploads/atcguidelines2016final.pdf). (Accessed 24  
53  
54  
55  
56  
57  
58  
59  
60



- 1  
2  
3  
4  
5  
6 May 2017).
- 7  
8  
9 21. Clopper CJ, Pearson ES. The use of confidence or fiducial limits illustrated in the  
10  
11 case of the binomial. *Biometrika* 1934;26:404–13.  
12  
13
- 14 22. Goulet JL, Fultz SL, Rimland D, et al. Aging and infectious diseases: do patterns of  
15  
16 comorbidity vary by HIV status, age, and HIV severity? *Clin Infect Dis*  
17  
18 2007;45:1593–601.  
19  
20
- 21 23. Hirschhorn LR, Kaaya SF, Garrity PS, et al. Cancer and the 'other'  
22  
23 noncommunicable chronic diseases in older people living with HIV/AIDS in  
24  
25 resource-limited settings: a challenge to success. *AIDS* 2012;26(Suppl 1):S65–S75.  
26  
27  
28  
29
- 30 24. Shiels MS, Pfeiffer RM, Gail MH, et al. Cancer burden in the HIV-infected  
31  
32 population in the United States. *J Natl Cancer Inst* 2011;103:753–62.  
33  
34  
35
- 36 25. Patel P, Hanson DL, Sullivan PS, et al. Incidence of types of cancer among  
37  
38 HIV-infected persons compared with the general population in the United States,  
39  
40 1992-2003. *Ann Intern Med* 2008;148:728–36.  
41  
42  
43  
44
- 45 26. Silverberg MJ, Lau B, Achenbach CJ, et al. Cumulative incidence of cancer among  
46  
47 persons with HIV in North America: a cohort study. *Ann Intern Med*  
48  
49 2015;163:507–18.  
50  
51  
52  
53  
54  
55  
56  
57  
58  
59  
60

- 1  
2  
3  
4  
5  
6 27. Katano H, Hishima T, Mochizuki M, et al. The prevalence of opportunistic  
7  
8 infections and malignancies in autopsied patients with human immunodeficiency  
9  
10 virus infection in Japan. *BMC Infect Dis* 2014;14:229.  
11  
12  
13  
14 28. Yanik EL, Katki HA, Engels EA. Cancer risk among the HIV-infected elderly in  
15  
16 the United States. *AIDS* 2016;30:1663–8.  
17  
18  
19  
20 29. Holtzman C, Armon C, Tedaldi E, et al. Polypharmacy and risk of antiretroviral  
21  
22 drug interactions among the aging HIV-infected population. *J Gen Intern Med*  
23  
24 2013;28:1302–10.  
25  
26  
27  
28 30. Tseng A, Szadkowski L, Walmsley S, et al. Association of age with polypharmacy  
29  
30 and risk of drug interactions with antiretroviral medications in HIV-positive  
31  
32 patients. *Ann Pharmacother* 2013;47:1429–39.  
33  
34  
35  
36  
37 31. Marzolini C, Back D, Weber R, et al. Ageing with HIV: medication use and risk for  
38  
39 potential drug-drug interactions. *J Antimicrob Chemother* 2011;66:2107–11.  
40  
41  
42  
43 32. da Cunha J, Maselli LM, Stern AC, et al. Impact of antiretroviral therapy on lipid  
44  
45 metabolism of human immunodeficiency virus-infected patients: Old and new  
46  
47 drugs. *World J Virol* 2015;4:56–77.  
48  
49  
50  
51 33. Lake JE, Currier JS. Metabolic disease in HIV infection. *Lancet Infect Dis*  
52  
53 2013;13:964–75.  
54  
55  
56  
57  
58  
59  
60

- 1  
2  
3  
4  
5  
6 34. Brogan K, Lux J. Management of common psychiatric conditions in the  
7  
8 HIV-positive population. *Curr HIV/AIDS Rep* 2009;6:108–15.  
9  
10  
11 35. Watkins CC, Treisman GJ. Neuropsychiatric complications of aging with HIV. *J*  
12  
13 *Neurovirol* 2012;18:277–90.  
14  
15  
16 36. Mizokami F, Koide Y, Noro T, et al. Polypharmacy with common diseases in  
17  
18 hospitalized elderly patients. *Am J Geriatr Pharmacother* 2012;10:123–8.  
19  
20  
21 37. de Maat MM, Ekhardt GC, Huitema AD, et al. Drug interactions between  
22  
23 antiretroviral drugs and comedicated agents. *Clin Pharmacokinet* 2003;42:223–82.  
24  
25  
26  
27 38. Nachegea JB, Hsu AJ, Uthman OA, et al. Antiretroviral therapy adherence and  
28  
29 drug-drug interactions in the aging HIV population. *AIDS* 2012;26(Suppl 1):S39–  
30  
31 S53.  
32  
33  
34  
35  
36  
37  
38  
39  
40  
41  
42  
43  
44  
45  
46  
47  
48  
49  
50  
51  
52  
53  
54  
55  
56  
57  
58  
59  
60

[Figure legends]

**Figure 1. Age and sex distribution of studied patients living with HIV (n=1445)**

**Figure 2. Number and type of chronic comorbidities by age group**

Note: \* indicates  $p < 0.0001$  under the Cochran–Armitage trend test.

**Figure 3. Number and type of co-medications prescribed by age group**

Figure 3B shows the top five common co-medications in this study.

**Figure 4. Proportions of studied patients with AIDS-defining cancers and non-AIDS-defining cancers among patients with any malignancies within each age group**

Supplementary Material

**Supplementary Table 1.** Diseases that led to hospital admission among patients with a hospital admission record for non-AIDS-defining conditions only (n=196)

**Supplementary Table 2.** Number of patients with each disease classified under the same comorbidity category (vascular diseases and psychiatric disorders)

1  
2  
3  
4  
5  
6  
7  
8  
9  
10  
11  
12  
13  
14  
15  
16  
17  
18  
19  
20  
21  
22  
23  
24  
25  
26  
27  
28  
29  
30  
31  
32  
33  
34  
35  
36  
37  
38  
39  
40  
41  
42  
43  
44  
45  
46  
47  
48  
49  
50  
51  
52  
53  
54  
55  
56  
57  
58  
59  
60

**Supplementary Table 3.** Co-medications frequently used by patients with or without a hospital admission record during the study period

For peer review only

1  
2  
3  
4  
5  
6  
7  
8  
9  
10  
11  
12  
13  
14  
15  
16  
17  
18  
19  
20  
21  
22  
23  
24  
25  
26  
27  
28  
29  
30  
31  
32  
33  
34  
35  
36  
37  
38  
39  
40  
41  
42  
43  
44  
45  
46  
47  
48  
49  
50  
51  
52  
53  
54  
55  
56  
57  
58  
59  
60



Age and sex distribution of studied patients living with HIV (n=1445)

111x69mm (300 x 300 DPI)

Review only

A) Number of chronic comorbidities by age group

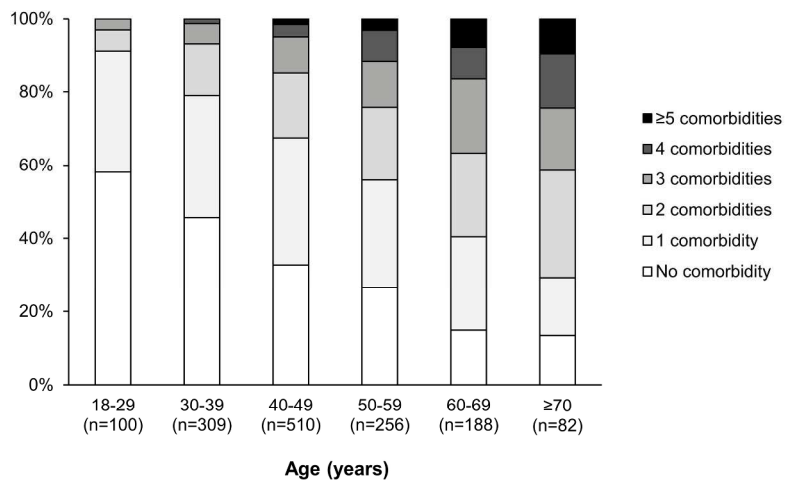

B) Type of chronic comorbidities by age group

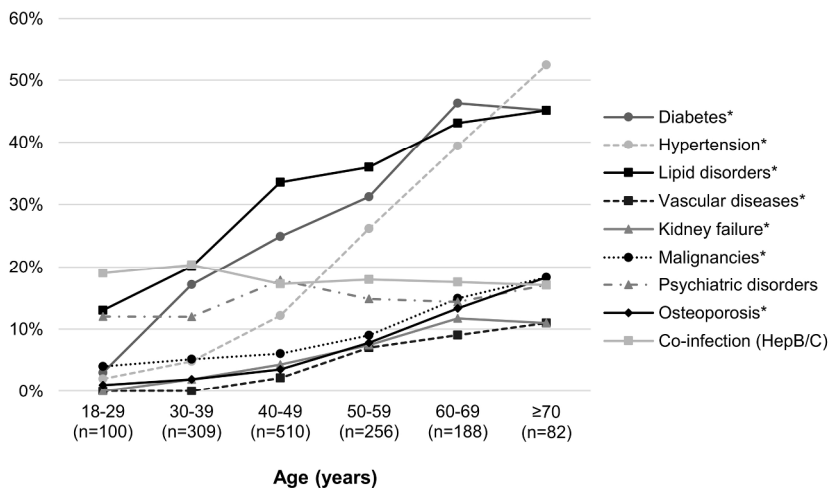

Number and type of chronic comorbidities by age group. Note: \* indicates  $p < 0.0001$  under the Cochran-Armitage trend test.

219x295mm (300 x 300 DPI)

A) Number of co-medications by age group

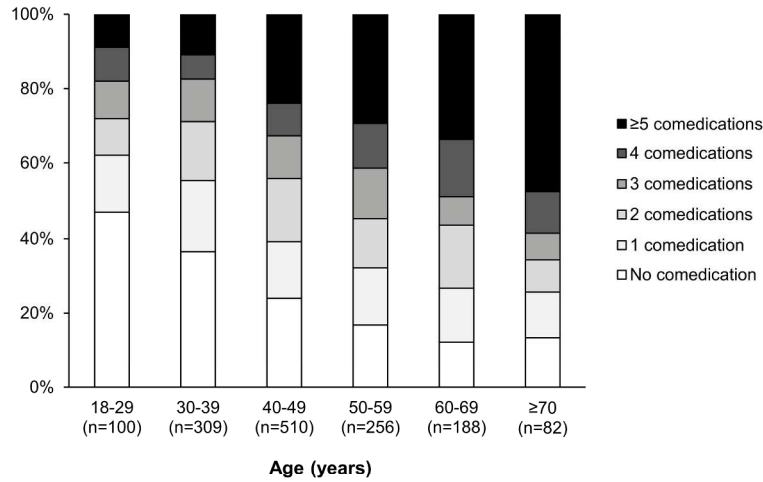

B) Type of co-medications by age group

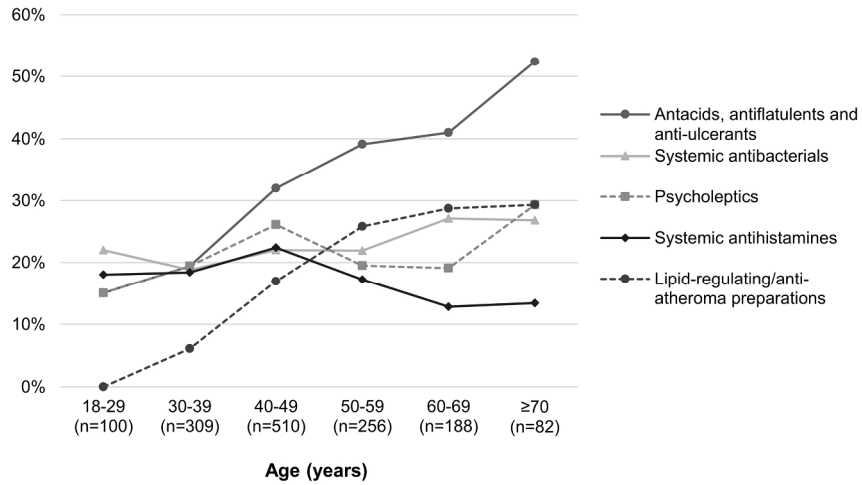

Number and type of co-medications prescribed by age group. Figure 3B shows the top five common co-medications in this study.

223x288mm (300 x 300 DPI)



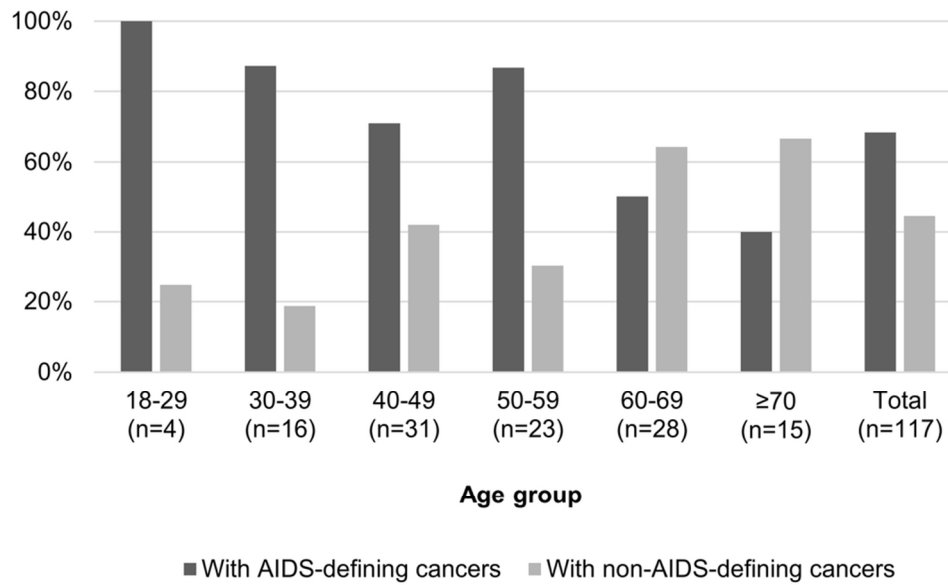

Proportions of studied patients with AIDS-defining cancers and non-AIDS-defining cancers among patients with any malignancies within each age group

89x56mm (300 x 300 DPI)

**Supplementary Table 1.**  
**Diseases that led to hospital admission among patients with a hospital admission record for non-AIDS-defining conditions only (n=196)**

| ICD-10 code | Disease                                                                                       | n | %    |
|-------------|-----------------------------------------------------------------------------------------------|---|------|
| K35.9*      | Acute appendicitis, unspecified                                                               | 6 | 3.1% |
| A09         | Other gastroenteritis and colitis of infectious and unspecified origin                        | 5 | 2.6% |
| D66         | Hereditary factor VIII deficiency                                                             | 5 | 2.6% |
| E86         | Volume depletion                                                                              | 5 | 2.6% |
| J15.9       | Bacterial pneumonia, unspecified                                                              | 5 | 2.6% |
| A41.9       | Sepsis, unspecified                                                                           | 4 | 2.0% |
| B18.2       | Chronic viral hepatitis C                                                                     | 4 | 2.0% |
| D70         | Agranulocytosis                                                                               | 4 | 2.0% |
| I50.0       | Congestive heart failure                                                                      | 4 | 2.0% |
| J69.0       | Pneumonitis due to food and vomit                                                             | 4 | 2.0% |
| K85         | Acute pancreatitis                                                                            | 4 | 2.0% |
| A06.4       | Amoebic liver abscess                                                                         | 3 | 1.5% |
| A52.3       | Neurosyphilis, unspecified                                                                    | 3 | 1.5% |
| B02.7       | Disseminated zoster                                                                           | 3 | 1.5% |
| B23.0       | Acute HIV infection syndrome                                                                  | 3 | 1.5% |
| G40.8       | Other epilepsy                                                                                | 3 | 1.5% |
| G51.0       | Bell palsy                                                                                    | 3 | 1.5% |
| H33.0       | Retinal detachment with retinal break                                                         | 3 | 1.5% |
| I20.8       | Other forms of angina pectoris                                                                | 3 | 1.5% |
| I61.0       | Intracerebral haemorrhage in hemisphere, subcortical                                          | 3 | 1.5% |
| I70.2       | Atherosclerosis of arteries of extremities                                                    | 3 | 1.5% |
| J18.9       | Pneumonia, unspecified                                                                        | 3 | 1.5% |
| N18.0*      | End-stage renal disease                                                                       | 3 | 1.5% |
| N39.0       | Urinary tract infection, site not specified                                                   | 3 | 1.5% |
| B02.9       | Zoster without complication                                                                   | 2 | 1.0% |
| C15.1       | Malignant neoplasm: Thoracic part of oesophagus                                               | 2 | 1.0% |
| C34.1       | Malignant neoplasm: Upper lobe, bronchus or lung                                              | 2 | 1.0% |
| I48         | Atrial fibrillation and flutter                                                               | 2 | 1.0% |
| I49.5       | Sick sinus syndrome                                                                           | 2 | 1.0% |
| I50.9       | Heart failure, unspecified                                                                    | 2 | 1.0% |
| I63.9       | Cerebral infarction, unspecified                                                              | 2 | 1.0% |
| J03.9       | Acute tonsillitis, unspecified                                                                | 2 | 1.0% |
| J84.1       | Other interstitial pulmonary diseases with fibrosis                                           | 2 | 1.0% |
| J84.9       | Interstitial pulmonary disease, unspecified                                                   | 2 | 1.0% |
| N17.9       | Acute renal failure, unspecified                                                              | 2 | 1.0% |
| N18.9       | Chronic kidney disease, unspecified                                                           | 2 | 1.0% |
| N20.1       | Calculus of ureter                                                                            | 2 | 1.0% |
| R50.9       | Fever, unspecified                                                                            | 2 | 1.0% |
| S72.0       | Fracture of neck of femur                                                                     | 2 | 1.0% |
| T78.2       | Anaphylactic shock, unspecified                                                               | 2 | 1.0% |
| T82.8       | Other specified complications of cardiac and vascular prosthetic devices, implants and grafts | 2 | 1.0% |
| A48.1       | Legionnaires disease                                                                          | 1 | 0.5% |
| A49.9       | Bacterial infection, unspecified                                                              | 1 | 0.5% |
| A52.1       | Symptomatic neurosyphilis                                                                     | 1 | 0.5% |
| A53.9       | Syphilis, unspecified                                                                         | 1 | 0.5% |
| A63.0       | Anogenital (venereal) warts                                                                   | 1 | 0.5% |
| B20.2       | HIV disease resulting in cytomegaloviral disease                                              | 1 | 0.5% |
| B45.0       | Pulmonary cryptococcosis                                                                      | 1 | 0.5% |
| C16.3       | Malignant neoplasm: Pyloric antrum                                                            | 1 | 0.5% |
| C22.0       | Malignant neoplasm: Liver cell carcinoma                                                      | 1 | 0.5% |
| C30.0       | Malignant neoplasm: Nasal cavity                                                              | 1 | 0.5% |
| C44.7       | Malignant neoplasm: Skin of lower limb, including hip                                         | 1 | 0.5% |
| C92.0       | Acute myeloblastic leukaemia [AML]                                                            | 1 | 0.5% |
| D13.5       | Benign neoplasm: Extrahepatic bile ducts                                                      | 1 | 0.5% |
| D29.0       | Benign neoplasm: Penis                                                                        | 1 | 0.5% |
| D37.0       | Neoplasm of uncertain or unknown behaviour: Lip, oral cavity and pharynx                      | 1 | 0.5% |
| D61.9       | Aplastic anaemia, unspecified                                                                 | 1 | 0.5% |
| D64.8       | Other specified anaemias                                                                      | 1 | 0.5% |
| D69.3       | Idiopathic thrombocytopenic purpura                                                           | 1 | 0.5% |
| D76.3       | Other histiocytosis syndromes                                                                 | 1 | 0.5% |
| E10.3       | Type 1 diabetes mellitus with ophthalmic complications                                        | 1 | 0.5% |
| E11         | Type 2 diabetes mellitus                                                                      | 1 | 0.5% |
| E11.0       | Type 2 diabetes mellitus with coma                                                            | 1 | 0.5% |
| E11.4       | Type 2 diabetes mellitus with neurological complications                                      | 1 | 0.5% |

|    |        |                                                                                   |   |      |
|----|--------|-----------------------------------------------------------------------------------|---|------|
| 1  | E11.6  | Type 2 diabetes mellitus with other specified complications                       | 1 | 0.5% |
| 2  | E11.7  | Type 2 diabetes mellitus with multiple complications                              | 1 | 0.5% |
| 3  | E11.9  | Type 2 diabetes mellitus without complications                                    | 1 | 0.5% |
| 4  | E14    | Unspecified diabetes mellitus                                                     | 1 | 0.5% |
| 5  | E14.2  | Unspecified diabetes mellitus with renal complications                            | 1 | 0.5% |
| 6  | E23.0  | Hypopituitarism                                                                   | 1 | 0.5% |
| 7  | E23.2  | Diabetes insipidus                                                                | 1 | 0.5% |
| 8  | E26.0  | Primary hyperaldosteronism                                                        | 1 | 0.5% |
| 9  | E87.5  | Hyperkalaemia                                                                     | 1 | 0.5% |
| 10 | F32.9  | Depressive episode, unspecified                                                   | 1 | 0.5% |
| 11 | G00.9  | Bacterial meningitis, unspecified                                                 | 1 | 0.5% |
| 12 | G62.9  | Polyneuropathy, unspecified                                                       | 1 | 0.5% |
| 13 | G64    | Other disorders of peripheral nervous system                                      | 1 | 0.5% |
| 14 | H26.2  | Complicated cataract                                                              | 1 | 0.5% |
| 15 | H40.5  | Glaucoma secondary to other eye disorders                                         | 1 | 0.5% |
| 16 | H71    | Cholesteatoma of middle ear                                                       | 1 | 0.5% |
| 17 | H81.1  | Benign paroxysmal vertigo                                                         | 1 | 0.5% |
| 18 | H91.2  | Sudden idiopathic hearing loss                                                    | 1 | 0.5% |
| 19 | I20.0  | Unstable angina                                                                   | 1 | 0.5% |
| 20 | I20.9  | Angina pectoris, unspecified                                                      | 1 | 0.5% |
| 21 | I21.1  | Acute transmural myocardial infarction of inferior wall                           | 1 | 0.5% |
| 22 | I25.2  | Old myocardial infarction                                                         | 1 | 0.5% |
| 23 | I25.6  | Silent myocardial ischaemia                                                       | 1 | 0.5% |
| 24 | I61.9  | Intracerebral haemorrhage, unspecified                                            | 1 | 0.5% |
| 25 | I63.3  | Cerebral infarction due to thrombosis of cerebral arteries                        | 1 | 0.5% |
| 26 | I63.4  | Cerebral infarction due to embolism of cerebral arteries                          | 1 | 0.5% |
| 27 | I63.5  | Cerebral infarction due to unspecified occlusion or stenosis of cerebral arteries | 1 | 0.5% |
| 28 | I63.8  | Other cerebral infarction                                                         | 1 | 0.5% |
| 29 | I65.0  | Occlusion and stenosis of vertebral artery                                        | 1 | 0.5% |
| 30 | I65.2  | Occlusion and stenosis of carotid artery                                          | 1 | 0.5% |
| 31 | I71.0  | Dissection of aorta [any part]                                                    | 1 | 0.5% |
| 32 | I74.8  | Embolism and thrombosis of other arteries                                         | 1 | 0.5% |
| 33 | I84.2* | Internal haemorrhoids without complication                                        | 1 | 0.5% |
| 34 | J06.9  | Acute upper respiratory infection, unspecified                                    | 1 | 0.5% |
| 35 | J15.0  | Pneumonia due to Klebsiella pneumoniae                                            | 1 | 0.5% |
| 36 | J18.0  | Bronchopneumonia, unspecified                                                     | 1 | 0.5% |
| 37 | J20.9  | Acute bronchitis, unspecified                                                     | 1 | 0.5% |
| 38 | J30.4  | Allergic rhinitis, unspecified                                                    | 1 | 0.5% |
| 39 | J35.0  | Chronic tonsillitis                                                               | 1 | 0.5% |
| 40 | J36    | Peritonsillar abscess                                                             | 1 | 0.5% |
| 41 | J40    | Bronchitis, not specified as acute or chronic                                     | 1 | 0.5% |
| 42 | J44.9  | Chronic obstructive pulmonary disease, unspecified                                | 1 | 0.5% |
| 43 | J46    | Status asthmaticus                                                                | 1 | 0.5% |
| 44 | J67.8  | Hypersensitivity pneumonitis due to other organic dusts                           | 1 | 0.5% |
| 45 | J86.9  | Pyothorax without fistula                                                         | 1 | 0.5% |
| 46 | J93.1  | Other spontaneous pneumothorax                                                    | 1 | 0.5% |
| 47 | J94.0  | Chylous effusion                                                                  | 1 | 0.5% |
| 48 | J96.0  | Acute respiratory failure                                                         | 1 | 0.5% |
| 49 | J96.1  | Chronic respiratory failure                                                       | 1 | 0.5% |
| 50 | K22.1  | Ulcer of oesophagus                                                               | 1 | 0.5% |
| 51 | K25.0  | Gastric ulcer : acute with haemorrhage                                            | 1 | 0.5% |
| 52 | K25.3  | Gastric ulcer : acute without haemorrhage or perforation                          | 1 | 0.5% |
| 53 | K26.1  | Duodenal ulcer : acute with perforation                                           | 1 | 0.5% |
| 54 | K35.1* | Acute appendicitis with peritoneal abscess                                        | 1 | 0.5% |
| 55 | K36    | Other appendicitis                                                                | 1 | 0.5% |
| 56 | K42.9  | Umbilical hernia without obstruction or gangrene                                  | 1 | 0.5% |
| 57 | K52.9  | Noninfective gastroenteritis and colitis, unspecified                             | 1 | 0.5% |
| 58 | K57.3  | Diverticular disease of large intestine without perforation or abscess            | 1 | 0.5% |
| 59 | K60.3  | Anal fistula                                                                      | 1 | 0.5% |
| 60 | K65.8  | Other peritonitis                                                                 | 1 | 0.5% |
|    | K66.1  | Haemoperitoneum                                                                   | 1 | 0.5% |
|    | K75.0  | Abscess of liver                                                                  | 1 | 0.5% |
|    | K80.3  | Calculus of bile duct with cholangitis                                            | 1 | 0.5% |
|    | K92.2  | Gastrointestinal haemorrhage, unspecified                                         | 1 | 0.5% |
|    | L03.1  | Cellulitis of other parts of limb                                                 | 1 | 0.5% |
|    | L03.9  | Cellulitis, unspecified                                                           | 1 | 0.5% |
|    | L04.3  | Acute lymphadenitis of lower limb                                                 | 1 | 0.5% |
|    | L08.0  | Pyoderma                                                                          | 1 | 0.5% |
|    | L20.8  | Other atopic dermatitis                                                           | 1 | 0.5% |
|    | L53.0  | Toxic erythema                                                                    | 1 | 0.5% |
|    | L56.3  | Solar urticaria                                                                   | 1 | 0.5% |

|       |                                                                      |   |      |
|-------|----------------------------------------------------------------------|---|------|
| L75.0 | Bromhidrosis                                                         | 1 | 0.5% |
| M16.9 | Coxarthrosis, unspecified                                            | 1 | 0.5% |
| M46.5 | Other infective spondylopathies                                      | 1 | 0.5% |
| M54.1 | Radiculopathy                                                        | 1 | 0.5% |
| M62.8 | Other specified disorders of muscle                                  | 1 | 0.5% |
| M87.9 | Osteonecrosis, unspecified                                           | 1 | 0.5% |
| M95.0 | Acquired deformity of nose                                           | 1 | 0.5% |
| N04.0 | Nephrotic syndrome : minor glomerular abnormality                    | 1 | 0.5% |
| N10   | Acute tubulo-interstitial nephritis                                  | 1 | 0.5% |
| N13.1 | Hydronephrosis with ureteral stricture, not elsewhere classified     | 1 | 0.5% |
| N15.1 | Renal and perinephric abscess                                        | 1 | 0.5% |
| N21.0 | Calculus in bladder                                                  | 1 | 0.5% |
| N25.8 | Other disorders resulting from impaired renal tubular function       | 1 | 0.5% |
| N40   | Hyperplasia of prostate                                              | 1 | 0.5% |
| N45.9 | Orchitis, epididymitis and epididymo-orchitis without abscess        | 1 | 0.5% |
| N70.0 | Acute salpingitis and oophoritis                                     | 1 | 0.5% |
| N87.2 | Severe cervical dysplasia, not elsewhere classified                  | 1 | 0.5% |
| O00.1 | Tubal pregnancy                                                      | 1 | 0.5% |
| O42.0 | Premature rupture of membranes, onset of labour within 24 hours      | 1 | 0.5% |
| O42.9 | Premature rupture of membranes, unspecified                          | 1 | 0.5% |
| O75.7 | Vaginal delivery following previous caesarean section                | 1 | 0.5% |
| O82.9 | Delivery by caesarean section, unspecified                           | 1 | 0.5% |
| Q27.3 | Peripheral arteriovenous malformation                                | 1 | 0.5% |
| R40.2 | Coma, unspecified                                                    | 1 | 0.5% |
| R56.8 | Other and unspecified convulsions                                    | 1 | 0.5% |
| R63.0 | Anorexia                                                             | 1 | 0.5% |
| S00.8 | Superficial injury of other parts of head                            | 1 | 0.5% |
| S32.0 | Fracture of lumbar vertebra                                          | 1 | 0.5% |
| S36.4 | Injury of small intestine                                            | 1 | 0.5% |
| S72.1 | Pertrochanteric fracture                                             | 1 | 0.5% |
| S82.0 | Fracture of patella                                                  | 1 | 0.5% |
| S83.2 | Tear of meniscus, current                                            | 1 | 0.5% |
| T07   | Unspecified multiple injuries                                        | 1 | 0.5% |
| T18.5 | Foreign body in anus and rectum                                      | 1 | 0.5% |
| T84.0 | Mechanical complication of internal joint prosthesis                 | 1 | 0.5% |
| T84.5 | Infection and inflammatory reaction due to internal joint prosthesis | 1 | 0.5% |
| Z21   | Asymptomatic human immunodeficiency virus [HIV] infection status     | 1 | 0.5% |
| S83.2 | Tear of meniscus, current                                            | 1 | 0.5% |
| T07   | Unspecified multiple injuries                                        | 1 | 0.5% |
| T18.5 | Foreign body in anus and rectum                                      | 1 | 0.5% |
| T84.0 | Mechanical complication of internal joint prosthesis                 | 1 | 0.5% |
| T84.5 | Infection and inflammatory reaction due to internal joint prosthesis | 1 | 0.5% |
| Z21   | Asymptomatic human immunodeficiency virus [HIV] infection status     | 1 | 0.5% |

Patients can have multiple records of hospital admissions during the study period.

\* indicates the code that does not exist in the ICD-10 (2016 version). For K35.9, N18.0, and K35.1, disease names are according to the ICD-10 (2008 version), and for I84.2 the disease name is according to the ICD-10 (2010 version).

**Supplementary Table 2. Number of patients with each disease classified under the same comorbidity category (vascular diseases and psychiatric disorders)**

| Comorbidity                           | ICD-10 code | Total<br>(n=1445) |
|---------------------------------------|-------------|-------------------|
|                                       |             | n (%)             |
| Vascular diseases                     | -           | 55 (3.8)          |
| Hypertensive heart and renal diseases | I11, I13    | 1 (0.1)           |
| Angina pectoris                       | I20         | 55 (3.8)          |
| Myocardial infarction                 | I22         | 0 (0.0)           |
| Stroke                                | I64         | 0 (0.0)           |
| Psychiatric disorders                 | -           | 219 (15.2)        |
| Dementia                              | F01, F03    | 4 (0.3)           |
| Psychosis                             | F20–29      | 62 (4.3)          |
| Mania and depression                  | F30–32      | 121 (8.4)         |
| Anxiety                               | F40–41      | 78 (5.4)          |
| Insomnia                              | F51         | 17 (1.2)          |

Supplementary Table 3. Co-medications frequently used by patients with or without a hospital admission record during the study period

| Patients with a record of hospital admission<br>(n=324) |                                                                                |          |     |       | Patients with no record of hospital admission<br>(n=1121) |                                                                                |          |     |       |
|---------------------------------------------------------|--------------------------------------------------------------------------------|----------|-----|-------|-----------------------------------------------------------|--------------------------------------------------------------------------------|----------|-----|-------|
| Rank                                                    | Drug subgroup name                                                             | ATC Code | n   | %     | Rank                                                      | Drug subgroup name                                                             | ATC Code | n   | %     |
| 1                                                       | Antacids, antitflatulents and anti-ulcerants                                   | A02      | 178 | 54.9% | 1                                                         | Antacids, antitflatulents and anti-ulcerants                                   | A02      | 280 | 25.0% |
| 2                                                       | Systemic antibacterials                                                        | J01      | 137 | 42.3% | 2                                                         | Psycholeptics                                                                  | N05      | 223 | 19.9% |
| 3                                                       | Psycholeptics                                                                  | N05      | 95  | 29.3% | 3                                                         | Systemic antihistamines                                                        | R06      | 203 | 18.1% |
| 4                                                       | Anti-inflammatory and anti-rheumatic products                                  | M01      | 69  | 21.3% | 4                                                         | Lipid-regulating/anti-atheroma preparations                                    | C10      | 185 | 16.5% |
| 5                                                       | Systemic antihistamines                                                        | R06      | 65  | 20.1% | 5                                                         | Systemic antibacterials                                                        | J01      | 184 | 16.4% |
| 6                                                       | Lipid-regulating/anti-atheroma preparations                                    | C10      | 64  | 19.8% | 6                                                         | Anti-inflammatory and anti-rheumatic products                                  | M01      | 155 | 13.8% |
| 7                                                       | Antithrombotic agents                                                          | B01      | 58  | 17.9% | 7                                                         | Antidiarrhoeals, oral electrolyte replacers and intestinal anti-inflammatories | A07      | 120 | 10.7% |
| 8                                                       | Agents acting on the renin-angiotensin system                                  | C09      | 56  | 17.3% | 8                                                         | Agents acting on the renin-angiotensin system                                  | C09      | 104 | 9.3%  |
| 9                                                       | Antidiarrhoeals, oral electrolyte replacers and intestinal anti-inflammatories | A07      | 55  | 17.0% | 9                                                         | Vitamins                                                                       | A11      | 93  | 8.3%  |
| 10                                                      | Vitamins                                                                       | A11      | 55  | 17.0% | 10                                                        | Cough and cold preparations                                                    | R05      | 91  | 8.1%  |
| 11                                                      | Analgesics                                                                     | N02      | 54  | 16.7% | 11                                                        | Calcium antagonists                                                            | C08      | 80  | 7.1%  |
| 12                                                      | Systemic agents for fungal infections                                          | J02      | 53  | 16.4% | 12                                                        | Anti-gout preparations                                                         | M04      | 74  | 6.6%  |
| 13                                                      | Cough and cold preparations                                                    | R05      | 47  | 14.5% | 13                                                        | All other therapeutic products                                                 | V03      | 53  | 4.7%  |
| 14                                                      | Calcium antagonists                                                            | C08      | 45  | 13.9% | 14                                                        | Functional gastro-intestinal disorder drugs                                    | A03      | 53  | 4.7%  |
| 15                                                      | Systemic corticosteroids                                                       | H02      | 44  | 13.6% | 15                                                        | Cholagogues and hepatic protectors                                             | A05      | 53  | 4.7%  |
| 16                                                      | All other therapeutic products                                                 | V03      | 43  | 13.3% | 16                                                        | Analgesics                                                                     | N02      | 52  | 4.6%  |
| 17                                                      | Intravenous solutions                                                          | K01      | 39  | 12.0% | 17                                                        | Drugs used in diabetes                                                         | A10      | 49  | 4.4%  |
| 18                                                      | Functional gastro-intestinal disorder drugs                                    | A03      | 38  | 11.7% | 18                                                        | Psychoanaesthetics excluding anti-obesity preparations                         | N06      | 44  | 3.9%  |
| 19                                                      | Antivirals for systemic use                                                    | J05      | 38  | 11.7% | 19                                                        | Antithrombotic agents                                                          | B01      | 40  | 3.6%  |
| 20                                                      | Anti-gout preparations                                                         | M04      | 38  | 11.7% | 20                                                        | Anti-epileptics                                                                | N03      | 37  | 3.3%  |
| 21                                                      | Anti-epileptics                                                                | N03      | 38  | 11.7% | 21                                                        | Anti-asthma and copd products                                                  | R03      | 35  | 3.1%  |
| 22                                                      | Drugs used in diabetes                                                         | A10      | 35  | 10.8% | 22                                                        | Anti-anaemic preparations                                                      | B03      | 32  | 2.9%  |
| 23                                                      | Antiprotozoals and anthelmintics                                               | P01      | 33  | 10.2% | 23                                                        | Antiprotozoals and anthelmintics                                               | P01      | 27  | 2.4%  |
| 24                                                      | Cholagogues and hepatic protectors                                             | A05      | 30  | 9.3%  | 24                                                        | Systemic agents for fungal infections                                          | J02      | 25  | 2.2%  |
| 25                                                      | Drugs for constipation and bowel cleansers                                     | A06      | 29  | 9.0%  | 25                                                        | Drugs for constipation and bowel cleansers                                     | A06      | 24  | 2.1%  |
| 26                                                      | Psychoanaesthetics excluding anti-obesity preparations                         | N06      | 26  | 8.0%  | 26                                                        | Systemic corticosteroids                                                       | H02      | 22  | 2.0%  |
| 27                                                      | Diuretics                                                                      | C03      | 24  | 7.4%  | 27                                                        | Antivirals for systemic use                                                    | J05      | 22  | 2.0%  |
| 28                                                      | Anti-asthma and copd products                                                  | R03      | 19  | 5.9%  | 28                                                        | Beta-blocking agents                                                           | C07      | 22  | 2.0%  |
| 29                                                      | Blood coagulation system, other products                                       | B02      | 18  | 5.6%  | 29                                                        | Urologicals                                                                    | G04      | 21  | 1.9%  |
| 30                                                      | Anti-anaemic preparations                                                      | B03      | 18  | 5.6%  | 30                                                        | Diuretics                                                                      | C03      | 18  | 1.6%  |
| 31                                                      | Beta-blocking agents                                                           | C07      | 15  | 4.6%  | 31                                                        | Other CNS drugs                                                                | N07      | 18  | 1.6%  |
| 32                                                      | Urologicals                                                                    | G04      | 15  | 4.6%  | 32                                                        | Muscle relaxants                                                               | M03      | 17  | 1.5%  |
| 33                                                      | Antimycobacterials                                                             | J04      | 14  | 4.3%  | 33                                                        | Thyroid therapy                                                                | H03      | 14  | 1.2%  |
| 34                                                      | Dietetic agents                                                                | V06      | 14  | 4.3%  | 34                                                        | Cardiac therapy                                                                | C01      | 11  | 1.0%  |
| 35                                                      | Other CNS drugs                                                                | N07      | 13  | 4.0%  | 35                                                        | Blood coagulation system, other products                                       | B02      | 10  | 0.9%  |
| 36                                                      | Cardiac therapy                                                                | C01      | 12  | 3.7%  | 36                                                        | Antimycobacterials                                                             | J04      | 10  | 0.9%  |
| 37                                                      | All other non-therapeutic products                                             | V07      | 12  | 3.7%  | 37                                                        | Other drugs for disorders of the musculo-skeletal system                       | M05      | 10  | 0.9%  |
| 38                                                      | Mineral supplements                                                            | A12      | 8   | 2.5%  | 38                                                        | Antihypertensives                                                              | C02      | 8   | 0.7%  |
| 39                                                      | Injection solutions/infusion additives (<100ml)                                | K04      | 7   | 2.2%  | 39                                                        | Dietetic agents                                                                | V06      | 6   | 0.5%  |
| 40                                                      | Muscle relaxants                                                               | M03      | 7   | 2.2%  | 40                                                        | Other dermatological preparations                                              | D11      | 6   | 0.5%  |
| 41                                                      | Antihypertensives                                                              | C02      | 6   | 1.9%  | 41                                                        | Digestives, including digestive enzymes                                        | A09      | 5   | 0.4%  |
| 42                                                      | Other drugs for disorders of the musculo-skeletal system                       | M05      | 6   | 1.9%  | 42                                                        | Mineral supplements                                                            | A12      | 4   | 0.4%  |
| 43                                                      | Immunostimulating agents                                                       | L03      | 5   | 1.5%  | 43                                                        | Other cardiovascular products                                                  | C06      | 3   | 0.3%  |
| 44                                                      | Other cardiovascular products                                                  | C06      | 4   | 1.2%  | 44                                                        | Antifungals, dermatological                                                    | D01      | 3   | 0.3%  |
| 45                                                      | Antifungals, dermatological                                                    | D01      | 4   | 1.2%  | 45                                                        | Anti-parkinson drugs                                                           | N04      | 3   | 0.3%  |
| 46                                                      | Thyroid therapy                                                                | H03      | 4   | 1.2%  | 46                                                        | Cerebral and peripheral vasotherapeutics                                       | C04      | 3   | 0.3%  |
| 47                                                      | Other hormones                                                                 | H04      | 4   | 1.2%  | 47                                                        | Intravenous solutions                                                          | K01      | 2   | 0.2%  |
| 48                                                      | Anaesthetics                                                                   | N01      | 4   | 1.2%  | 48                                                        | Topical corticosteroids                                                        | D07      | 2   | 0.2%  |
| 49                                                      | Anti-parkinson drugs                                                           | N04      | 4   | 1.2%  | 49                                                        | Other alimentary tract and metabolism products                                 | A16      | 2   | 0.2%  |
| 50                                                      | Digestives, including digestive enzymes                                        | A09      | 3   | 0.9%  | 50                                                        | Cytostatic hormone therapy                                                     | L02      | 2   | 0.2%  |
| 51                                                      | Antiemetics and antinauseants                                                  | A04      | 2   | 0.6%  | 51                                                        | Topical anti-rheumatics                                                        | M02      | 1   | 0.1%  |
| 52                                                      | Cerebral and peripheral vasotherapeutics                                       | C04      | 2   | 0.6%  | 52                                                        | Antivaricosis/anti-haemorrhoidal preparations                                  | C05      | 1   | 0.1%  |
| 53                                                      | Topical corticosteroids                                                        | D07      | 2   | 0.6%  | 53                                                        | Immunosuppressants                                                             | L04      | 1   | 0.1%  |
| 54                                                      | Gynaecological anti-infectives                                                 | G01      | 2   | 0.6%  | 54                                                        | Cardiovascular multitherapy combination products                               | C11      | 1   | 0.1%  |
| 55                                                      | Topical anti-rheumatics                                                        | M02      | 2   | 0.6%  | 55                                                        | Emollients, protectives                                                        | D02      | 1   | 0.1%  |
| 56                                                      | Stomatologicals, mouth preparations, medicinal dentifrices etc                 | A01      | 1   | 0.3%  | 56                                                        | Nonsteroidal products for inflammatory skin disorders                          | D05      | 1   | 0.1%  |
| 57                                                      | Anabolics, systemic                                                            | A14      | 1   | 0.3%  | 57                                                        | Anti-acne preparations                                                         | D10      | 1   | 0.1%  |
| 58                                                      | Antivaricosis/anti-haemorrhoidal preparations                                  | C05      | 1   | 0.3%  | 58                                                        | Sex hormones and products with similar desired effects, systemic action only   | G03      | 1   | 0.1%  |
| 59                                                      | Antiseptics and disinfectants                                                  | D08      | 1   | 0.3%  | 59                                                        | Ophthalmologicals                                                              | S01      | 1   | 0.1%  |
| 60                                                      | Antineoplastics                                                                | L01      | 1   | 0.3%  | -                                                         | -                                                                              | -        | -   | -     |
| 61                                                      | Immunosuppressants                                                             | L04      | 1   | 0.3%  | -                                                         | -                                                                              | -        | -   | -     |

Co-medications prescribed for use for ≥30 days total during the study period, regardless of whether they are inpatient/outpatient prescriptions, are listed.

Co-medications were classified based on the therapeutic subgroups (2nd level) of ATC codes.

Gray-shaded cells indicate the class of hospital solutions (categorized under 'K' in EPhMRA ATC).

**The RECORD statement – checklist of items, extended from the STROBE statement, that should be reported in observational studies using routinely collected health data.**

|                           | Item No. | STROBE items                                                                                                                                                                               | Location in manuscript where items are reported | RECORD items                                                                                                                                                                                                                                                                                                                                                                                                                                | Location in manuscript where items are reported |
|---------------------------|----------|--------------------------------------------------------------------------------------------------------------------------------------------------------------------------------------------|-------------------------------------------------|---------------------------------------------------------------------------------------------------------------------------------------------------------------------------------------------------------------------------------------------------------------------------------------------------------------------------------------------------------------------------------------------------------------------------------------------|-------------------------------------------------|
| <b>Title and abstract</b> |          |                                                                                                                                                                                            |                                                 |                                                                                                                                                                                                                                                                                                                                                                                                                                             |                                                 |
|                           | 1        | (a) Indicate the study's design with a commonly used term in the title or the abstract (b) Provide in the abstract an informative and balanced summary of what was done and what was found | Page 3–4                                        | RECORD 1.1: The type of data used should be specified in the title or abstract. When possible, the name of the databases used should be included.<br><br>RECORD 1.2: If applicable, the geographic region and timeframe within which the study took place should be reported in the title or abstract.<br><br>RECORD 1.3: If linkage between databases was conducted for the study, this should be clearly stated in the title or abstract. | Page 3<br><br>Page 3<br><br>N/A                 |
| <b>Introduction</b>       |          |                                                                                                                                                                                            |                                                 |                                                                                                                                                                                                                                                                                                                                                                                                                                             |                                                 |
| Background rationale      | 2        | Explain the scientific background and rationale for the investigation being reported                                                                                                       | Page 7                                          |                                                                                                                                                                                                                                                                                                                                                                                                                                             |                                                 |
| Objectives                | 3        | State specific objectives, including any prespecified hypotheses                                                                                                                           | Page 7                                          |                                                                                                                                                                                                                                                                                                                                                                                                                                             |                                                 |
| <b>Methods</b>            |          |                                                                                                                                                                                            |                                                 |                                                                                                                                                                                                                                                                                                                                                                                                                                             |                                                 |
| Study Design              | 4        | Present key elements of study design early in the paper                                                                                                                                    | Page 8                                          |                                                                                                                                                                                                                                                                                                                                                                                                                                             |                                                 |
| Setting                   | 5        | Describe the setting, locations, and relevant dates, including periods of recruitment, exposure, follow-up, and data collection                                                            | Page 9–10                                       |                                                                                                                                                                                                                                                                                                                                                                                                                                             |                                                 |
| Participants              | 6        | (a) <i>Cohort study</i> - Give the eligibility criteria, and the                                                                                                                           | Page 9–10                                       | RECORD 6.1: The methods of study population selection (such as codes or                                                                                                                                                                                                                                                                                                                                                                     | Page 9–10                                       |

|                                                                                                                                           |                              |                                                                                                                                                                                                                                                                                                                                                                                                                                                                                                                                                                                                                                          |                                                                                                                                                                                      |                                                                                                                                                                                                                                                                                                                                                                                                                                                                                                                                                                                                                       |                                                                                                                                                                                                                 |            |
|-------------------------------------------------------------------------------------------------------------------------------------------|------------------------------|------------------------------------------------------------------------------------------------------------------------------------------------------------------------------------------------------------------------------------------------------------------------------------------------------------------------------------------------------------------------------------------------------------------------------------------------------------------------------------------------------------------------------------------------------------------------------------------------------------------------------------------|--------------------------------------------------------------------------------------------------------------------------------------------------------------------------------------|-----------------------------------------------------------------------------------------------------------------------------------------------------------------------------------------------------------------------------------------------------------------------------------------------------------------------------------------------------------------------------------------------------------------------------------------------------------------------------------------------------------------------------------------------------------------------------------------------------------------------|-----------------------------------------------------------------------------------------------------------------------------------------------------------------------------------------------------------------|------------|
| 1<br>2<br>3<br>4<br>5<br>6<br>7<br>8<br>9<br>10<br>11<br>12<br>13<br>14<br>15<br>16<br>17<br>18<br>19<br>20<br>21<br>22<br>23<br>24<br>25 |                              | sources and methods of selection of participants. Describe methods of follow-up<br><i>Case-control study</i> - Give the eligibility criteria, and the sources and methods of case ascertainment and control selection. Give the rationale for the choice of cases and controls<br><i>Cross-sectional study</i> - Give the eligibility criteria, and the sources and methods of selection of participants<br><br><i>(b) Cohort study</i> - For matched studies, give matching criteria and number of exposed and unexposed<br><i>Case-control study</i> - For matched studies, give matching criteria and the number of controls per case | N/A                                                                                                                                                                                  | algorithms used to identify subjects) should be listed in detail. If this is not possible, an explanation should be provided.<br><br>RECORD 6.2: Any validation studies of the codes or algorithms used to select the population should be referenced. If validation was conducted for this study and not published elsewhere, detailed methods and results should be provided.<br><br>RECORD 6.3: If the study involved linkage of databases, consider use of a flow diagram or other graphical display to demonstrate the data linkage process, including the number of individuals with linked data at each stage. | N/A<br><br><br><br>N/A                                                                                                                                                                                          |            |
| 26<br>27<br>28<br>29<br>30<br>31<br>32                                                                                                    | Variables                    | 7                                                                                                                                                                                                                                                                                                                                                                                                                                                                                                                                                                                                                                        | Clearly define all outcomes, exposures, predictors, potential confounders, and effect modifiers. Give diagnostic criteria, if applicable.                                            | Page 11–12                                                                                                                                                                                                                                                                                                                                                                                                                                                                                                                                                                                                            | RECORD 7.1: A complete list of codes and algorithms used to classify exposures, outcomes, confounders, and effect modifiers should be provided. If these cannot be reported, an explanation should be provided. | Page 11–12 |
| 33<br>34<br>35<br>36<br>37<br>38<br>39<br>40                                                                                              | Data sources/<br>measurement | 8                                                                                                                                                                                                                                                                                                                                                                                                                                                                                                                                                                                                                                        | For each variable of interest, give sources of data and details of methods of assessment (measurement). Describe comparability of assessment methods if there is more than one group | Page 10                                                                                                                                                                                                                                                                                                                                                                                                                                                                                                                                                                                                               |                                                                                                                                                                                                                 |            |
| 41<br>42                                                                                                                                  | Bias                         | 9                                                                                                                                                                                                                                                                                                                                                                                                                                                                                                                                                                                                                                        | Describe any efforts to address potential sources of bias                                                                                                                            | Page 10                                                                                                                                                                                                                                                                                                                                                                                                                                                                                                                                                                                                               |                                                                                                                                                                                                                 |            |
| 43<br>44<br>45<br>46<br>47                                                                                                                | Study size                   | 10                                                                                                                                                                                                                                                                                                                                                                                                                                                                                                                                                                                                                                       | Explain how the study size was                                                                                                                                                       | Page 9–10                                                                                                                                                                                                                                                                                                                                                                                                                                                                                                                                                                                                             |                                                                                                                                                                                                                 |            |



|                                                                                                                                           |                                  |            |                                                                                                                                                                                                                                                                                                                                                                                                                                                                                                                                                                      |                                                     |                                                                                                                                                                                                                                                              |
|-------------------------------------------------------------------------------------------------------------------------------------------|----------------------------------|------------|----------------------------------------------------------------------------------------------------------------------------------------------------------------------------------------------------------------------------------------------------------------------------------------------------------------------------------------------------------------------------------------------------------------------------------------------------------------------------------------------------------------------------------------------------------------------|-----------------------------------------------------|--------------------------------------------------------------------------------------------------------------------------------------------------------------------------------------------------------------------------------------------------------------|
|                                                                                                                                           |                                  | arrived at |                                                                                                                                                                                                                                                                                                                                                                                                                                                                                                                                                                      |                                                     |                                                                                                                                                                                                                                                              |
| 1<br>2<br>3<br>4<br>5<br>6                                                                                                                | Quantitative variables           | 11         | Explain how quantitative variables were handled in the analyses. If applicable, describe which groupings were chosen, and why                                                                                                                                                                                                                                                                                                                                                                                                                                        | Page 13                                             |                                                                                                                                                                                                                                                              |
| 7<br>8<br>9<br>10<br>11<br>12<br>13<br>14<br>15<br>16<br>17<br>18<br>19<br>20<br>21<br>22<br>23<br>24<br>25<br>26<br>27<br>28<br>29<br>30 | Statistical methods              | 12         | (a) Describe all statistical methods, including those used to control for confounding<br>(b) Describe any methods used to examine subgroups and interactions<br>(c) Explain how missing data were addressed<br>(d) <i>Cohort study</i> - If applicable, explain how loss to follow-up was addressed<br><i>Case-control study</i> - If applicable, explain how matching of cases and controls was addressed<br><i>Cross-sectional study</i> - If applicable, describe analytical methods taking account of sampling strategy<br>(e) Describe any sensitivity analyses | Page 13<br><br>N/A<br><br>N/A<br><br>N/A<br><br>N/A |                                                                                                                                                                                                                                                              |
| 31<br>32<br>33<br>34<br>35<br>36<br>37<br>38<br>39<br>40<br>41                                                                            | Data access and cleaning methods |            | ..                                                                                                                                                                                                                                                                                                                                                                                                                                                                                                                                                                   |                                                     | RECORD 12.1: Authors should describe the extent to which the investigators had access to the database population used to create the study population.<br><br>RECORD 12.2: Authors should provide information on the data cleaning methods used in the study. |
| 42<br>43<br>44                                                                                                                            | Linkage                          |            | ..                                                                                                                                                                                                                                                                                                                                                                                                                                                                                                                                                                   |                                                     | RECORD 12.3: State whether the study included person-level, institutional-                                                                                                                                                                                   |

Not reported.

Not reported.

N/A

|                  |    |                                                                                                                                                                                                                                                                                                                                                 |                                   |                                                                                                                                                                                                                                                                                                                    |         |
|------------------|----|-------------------------------------------------------------------------------------------------------------------------------------------------------------------------------------------------------------------------------------------------------------------------------------------------------------------------------------------------|-----------------------------------|--------------------------------------------------------------------------------------------------------------------------------------------------------------------------------------------------------------------------------------------------------------------------------------------------------------------|---------|
|                  |    |                                                                                                                                                                                                                                                                                                                                                 |                                   | level, or other data linkage across two or more databases. The methods of linkage and methods of linkage quality evaluation should be provided.                                                                                                                                                                    |         |
| <b>Results</b>   |    |                                                                                                                                                                                                                                                                                                                                                 |                                   |                                                                                                                                                                                                                                                                                                                    |         |
| Participants     | 13 | (a) Report the numbers of individuals at each stage of the study ( <i>e.g.</i> , numbers potentially eligible, examined for eligibility, confirmed eligible, included in the study, completing follow-up, and analysed)<br>(b) Give reasons for non-participation at each stage.<br>(c) Consider use of a flow diagram                          | Page 14<br><br>Page 14<br><br>N/A | RECORD 13.1: Describe in detail the selection of the persons included in the study ( <i>i.e.</i> , study population selection) including filtering based on data quality, data availability and linkage. The selection of included persons can be described in the text and/or by means of the study flow diagram. | Page 14 |
| Descriptive data | 14 | (a) Give characteristics of study participants ( <i>e.g.</i> , demographic, clinical, social) and information on exposures and potential confounders<br>(b) Indicate the number of participants with missing data for each variable of interest<br>(c) <i>Cohort study</i> - summarise follow-up time ( <i>e.g.</i> , average and total amount) | Page 14–15<br><br>N/A<br><br>N/A  |                                                                                                                                                                                                                                                                                                                    |         |
| Outcome data     | 15 | <i>Cohort study</i> - Report numbers of outcome events or summary measures over time<br><i>Case-control study</i> - Report numbers in each exposure category, or summary measures of exposure<br><i>Cross-sectional study</i> - Report numbers of outcome events or summary measures                                                            | Page 15, 17                       |                                                                                                                                                                                                                                                                                                                    |         |
| Main results     | 16 | (a) Give unadjusted estimates                                                                                                                                                                                                                                                                                                                   | Page 15–18                        |                                                                                                                                                                                                                                                                                                                    |         |

|                   |    |                                                                                                                                                                                                                                                                                                                                                                                   |                |                                                                                                                                                                                                                                                                                                          |            |
|-------------------|----|-----------------------------------------------------------------------------------------------------------------------------------------------------------------------------------------------------------------------------------------------------------------------------------------------------------------------------------------------------------------------------------|----------------|----------------------------------------------------------------------------------------------------------------------------------------------------------------------------------------------------------------------------------------------------------------------------------------------------------|------------|
|                   |    | and, if applicable, confounder-adjusted estimates and their precision (e.g., 95% confidence interval). Make clear which confounders were adjusted for and why they were included<br>(b) Report category boundaries when continuous variables were categorized<br>(c) If relevant, consider translating estimates of relative risk into absolute risk for a meaningful time period | N/A<br><br>N/A |                                                                                                                                                                                                                                                                                                          |            |
| Other analyses    | 17 | Report other analyses done—e.g., analyses of subgroups and interactions, and sensitivity analyses                                                                                                                                                                                                                                                                                 | N/A            |                                                                                                                                                                                                                                                                                                          |            |
| <b>Discussion</b> |    |                                                                                                                                                                                                                                                                                                                                                                                   |                |                                                                                                                                                                                                                                                                                                          |            |
| Key results       | 18 | Summarise key results with reference to study objectives                                                                                                                                                                                                                                                                                                                          | Page 20        |                                                                                                                                                                                                                                                                                                          |            |
| Limitations       | 19 | Discuss limitations of the study, taking into account sources of potential bias or imprecision. Discuss both direction and magnitude of any potential bias                                                                                                                                                                                                                        | Page 23–24     | RECORD 19.1: Discuss the implications of using data that were not created or collected to answer the specific research question(s). Include discussion of misclassification bias, unmeasured confounding, missing data, and changing eligibility over time, as they pertain to the study being reported. | Page 23–24 |
| Interpretation    | 20 | Give a cautious overall interpretation of results considering objectives, limitations, multiplicity of analyses, results from similar studies, and other relevant evidence                                                                                                                                                                                                        | Page 25        |                                                                                                                                                                                                                                                                                                          |            |
| Generalisability  | 21 | Discuss the generalisability (external validity) of the study results                                                                                                                                                                                                                                                                                                             | Page 23–24     |                                                                                                                                                                                                                                                                                                          |            |

| Other Information                                         |    |                                                                                                                                                               |                         |                                                                                                                                                          |                         |
|-----------------------------------------------------------|----|---------------------------------------------------------------------------------------------------------------------------------------------------------------|-------------------------|----------------------------------------------------------------------------------------------------------------------------------------------------------|-------------------------|
| Funding                                                   | 22 | Give the source of funding and the role of the funders for the present study and, if applicable, for the original study on which the present article is based | <a href="#">Page 26</a> |                                                                                                                                                          |                         |
| Accessibility of protocol, raw data, and programming code |    | ..                                                                                                                                                            |                         | RECORD 22.1: Authors should provide information on how to access any supplemental information such as the study protocol, raw data, or programming code. | <a href="#">Page 26</a> |

\*Reference: Benchimol EI, Smeeth L, Guttman A, Harron K, Moher D, Petersen I, Sørensen HT, von Elm E, Langan SM, the RECORD Working Committee. The REporting of studies Conducted using Observational Routinely-collected health Data (RECORD) Statement. *PLoS Medicine* 2015; in press.

\*Checklist is protected under Creative Commons Attribution ([CC BY](#)) license.
