# Supplementary material for: Comorbidities and the use of comedications in people living with HIV on antiretroviral therapy in Japan: a cross-sectional study using a hospital claims database
Source: PubMed Central journal article supplement — BMJ Open. 2018 Jun 14;8(6):e019985. doi: 10.1136/bmjopen-2017-019985 (PMC6009456; doi:10.1136/bmjopen-2017-019985), 2018-06-14
Supplement: bmjopen-2017-019985supp001.pdf [file bmjopen-2017-019985supp001.pdf]

**Supplementary Table 1.****Diseases that led to hospital admission among patients with a hospital admission record for non-AIDS-defining conditions only (n=196)**

| ICD-10 code | Disease                                                                                       | n | %    |
|-------------|-----------------------------------------------------------------------------------------------|---|------|
| K35.9*      | Acute appendicitis, unspecified                                                               | 6 | 3.1% |
| A09         | Other gastroenteritis and colitis of infectious and unspecified origin                        | 5 | 2.6% |
| D66         | Hereditary factor VIII deficiency                                                             | 5 | 2.6% |
| E86         | Volume depletion                                                                              | 5 | 2.6% |
| J15.9       | Bacterial pneumonia, unspecified                                                              | 5 | 2.6% |
| A41.9       | Sepsis, unspecified                                                                           | 4 | 2.0% |
| B18.2       | Chronic viral hepatitis C                                                                     | 4 | 2.0% |
| D70         | Agranulocytosis                                                                               | 4 | 2.0% |
| I50.0       | Congestive heart failure                                                                      | 4 | 2.0% |
| J69.0       | Pneumonitis due to food and vomit                                                             | 4 | 2.0% |
| K85         | Acute pancreatitis                                                                            | 4 | 2.0% |
| A06.4       | Amoebic liver abscess                                                                         | 3 | 1.5% |
| A52.3       | Neurosyphilis, unspecified                                                                    | 3 | 1.5% |
| B02.7       | Disseminated zoster                                                                           | 3 | 1.5% |
| B23.0       | Acute HIV infection syndrome                                                                  | 3 | 1.5% |
| G40.8       | Other epilepsy                                                                                | 3 | 1.5% |
| G51.0       | Bell palsy                                                                                    | 3 | 1.5% |
| H33.0       | Retinal detachment with retinal break                                                         | 3 | 1.5% |
| I20.8       | Other forms of angina pectoris                                                                | 3 | 1.5% |
| I61.0       | Intracerebral haemorrhage in hemisphere, subcortical                                          | 3 | 1.5% |
| I70.2       | Atherosclerosis of arteries of extremities                                                    | 3 | 1.5% |
| J18.9       | Pneumonia, unspecified                                                                        | 3 | 1.5% |
| N18.0*      | End-stage renal disease                                                                       | 3 | 1.5% |
| N39.0       | Urinary tract infection, site not specified                                                   | 3 | 1.5% |
| B02.9       | Zoster without complication                                                                   | 2 | 1.0% |
| C15.1       | Malignant neoplasm: Thoracic part of oesophagus                                               | 2 | 1.0% |
| C34.1       | Malignant neoplasm: Upper lobe, bronchus or lung                                              | 2 | 1.0% |
| I48         | Atrial fibrillation and flutter                                                               | 2 | 1.0% |
| I49.5       | Sick sinus syndrome                                                                           | 2 | 1.0% |
| I50.9       | Heart failure, unspecified                                                                    | 2 | 1.0% |
| I63.9       | Cerebral infarction, unspecified                                                              | 2 | 1.0% |
| J03.9       | Acute tonsillitis, unspecified                                                                | 2 | 1.0% |
| J84.1       | Other interstitial pulmonary diseases with fibrosis                                           | 2 | 1.0% |
| J84.9       | Interstitial pulmonary disease, unspecified                                                   | 2 | 1.0% |
| N17.9       | Acute renal failure, unspecified                                                              | 2 | 1.0% |
| N18.9       | Chronic kidney disease, unspecified                                                           | 2 | 1.0% |
| N20.1       | Calculus of ureter                                                                            | 2 | 1.0% |
| R50.9       | Fever, unspecified                                                                            | 2 | 1.0% |
| S72.0       | Fracture of neck of femur                                                                     | 2 | 1.0% |
| T78.2       | Anaphylactic shock, unspecified                                                               | 2 | 1.0% |
| T82.8       | Other specified complications of cardiac and vascular prosthetic devices, implants and grafts | 2 | 1.0% |
| A48.1       | Legionnaires disease                                                                          | 1 | 0.5% |
| A49.9       | Bacterial infection, unspecified                                                              | 1 | 0.5% |
| A52.1       | Symptomatic neurosyphilis                                                                     | 1 | 0.5% |
| A53.9       | Syphilis, unspecified                                                                         | 1 | 0.5% |
| A63.0       | Anogenital (venereal) warts                                                                   | 1 | 0.5% |
| B20.2       | HIV disease resulting in cytomegaloviral disease                                              | 1 | 0.5% |
| B45.0       | Pulmonary cryptococcosis                                                                      | 1 | 0.5% |
| C16.3       | Malignant neoplasm: Pyloric antrum                                                            | 1 | 0.5% |
| C22.0       | Malignant neoplasm: Liver cell carcinoma                                                      | 1 | 0.5% |
| C30.0       | Malignant neoplasm: Nasal cavity                                                              | 1 | 0.5% |
| C44.7       | Malignant neoplasm: Skin of lower limb, including hip                                         | 1 | 0.5% |
| C92.0       | Acute myeloblastic leukaemia [AML]                                                            | 1 | 0.5% |
| D13.5       | Benign neoplasm: Extrahepatic bile ducts                                                      | 1 | 0.5% |
| D29.0       | Benign neoplasm: Penis                                                                        | 1 | 0.5% |
| D37.0       | Neoplasm of uncertain or unknown behaviour: Lip, oral cavity and pharynx                      | 1 | 0.5% |
| D61.9       | Aplastic anaemia, unspecified                                                                 | 1 | 0.5% |
| D64.8       | Other specified anaemias                                                                      | 1 | 0.5% |
| D69.3       | Idiopathic thrombocytopenic purpura                                                           | 1 | 0.5% |
| D76.3       | Other histiocytosis syndromes                                                                 | 1 | 0.5% |
| E10.3       | Type 1 diabetes mellitus with ophthalmic complications                                        | 1 | 0.5% |
| E11         | Type 2 diabetes mellitus                                                                      | 1 | 0.5% |
| E11.0       | Type 2 diabetes mellitus with coma                                                            | 1 | 0.5% |
| E11.4       | Type 2 diabetes mellitus with neurological complications                                      | 1 | 0.5% |

|        |                                                                                   |   |      |
|--------|-----------------------------------------------------------------------------------|---|------|
| E11.6  | Type 2 diabetes mellitus with other specified complications                       | 1 | 0.5% |
| E11.7  | Type 2 diabetes mellitus with multiple complications                              | 1 | 0.5% |
| E11.9  | Type 2 diabetes mellitus without complications                                    | 1 | 0.5% |
| E14    | Unspecified diabetes mellitus                                                     | 1 | 0.5% |
| E14.2  | Unspecified diabetes mellitus with renal complications                            | 1 | 0.5% |
| E23.0  | Hypopituitarism                                                                   | 1 | 0.5% |
| E23.2  | Diabetes insipidus                                                                | 1 | 0.5% |
| E26.0  | Primary hyperaldosteronism                                                        | 1 | 0.5% |
| E87.5  | Hyperkalaemia                                                                     | 1 | 0.5% |
| F32.9  | Depressive episode, unspecified                                                   | 1 | 0.5% |
| G00.9  | Bacterial meningitis, unspecified                                                 | 1 | 0.5% |
| G62.9  | Polyneuropathy, unspecified                                                       | 1 | 0.5% |
| G64    | Other disorders of peripheral nervous system                                      | 1 | 0.5% |
| H26.2  | Complicated cataract                                                              | 1 | 0.5% |
| H40.5  | Glaucoma secondary to other eye disorders                                         | 1 | 0.5% |
| H71    | Cholesteatoma of middle ear                                                       | 1 | 0.5% |
| H81.1  | Benign paroxysmal vertigo                                                         | 1 | 0.5% |
| H91.2  | Sudden idiopathic hearing loss                                                    | 1 | 0.5% |
| I20.0  | Unstable angina                                                                   | 1 | 0.5% |
| I20.9  | Angina pectoris, unspecified                                                      | 1 | 0.5% |
| I21.1  | Acute transmural myocardial infarction of inferior wall                           | 1 | 0.5% |
| I25.2  | Old myocardial infarction                                                         | 1 | 0.5% |
| I25.6  | Silent myocardial ischaemia                                                       | 1 | 0.5% |
| I61.9  | Intracerebral haemorrhage, unspecified                                            | 1 | 0.5% |
| I63.3  | Cerebral infarction due to thrombosis of cerebral arteries                        | 1 | 0.5% |
| I63.4  | Cerebral infarction due to embolism of cerebral arteries                          | 1 | 0.5% |
| I63.5  | Cerebral infarction due to unspecified occlusion or stenosis of cerebral arteries | 1 | 0.5% |
| I63.8  | Other cerebral infarction                                                         | 1 | 0.5% |
| I65.0  | Occlusion and stenosis of vertebral artery                                        | 1 | 0.5% |
| I65.2  | Occlusion and stenosis of carotid artery                                          | 1 | 0.5% |
| I71.0  | Dissection of aorta [any part]                                                    | 1 | 0.5% |
| I74.8  | Embolism and thrombosis of other arteries                                         | 1 | 0.5% |
| I84.2* | Internal haemorrhoids without complication                                        | 1 | 0.5% |
| J06.9  | Acute upper respiratory infection, unspecified                                    | 1 | 0.5% |
| J15.0  | Pneumonia due to Klebsiella pneumoniae                                            | 1 | 0.5% |
| J18.0  | Bronchopneumonia, unspecified                                                     | 1 | 0.5% |
| J20.9  | Acute bronchitis, unspecified                                                     | 1 | 0.5% |
| J30.4  | Allergic rhinitis, unspecified                                                    | 1 | 0.5% |
| J35.0  | Chronic tonsillitis                                                               | 1 | 0.5% |
| J36    | Peritonsillar abscess                                                             | 1 | 0.5% |
| J40    | Bronchitis, not specified as acute or chronic                                     | 1 | 0.5% |
| J44.9  | Chronic obstructive pulmonary disease, unspecified                                | 1 | 0.5% |
| J46    | Status asthmaticus                                                                | 1 | 0.5% |
| J67.8  | Hypersensitivity pneumonitis due to other organic dusts                           | 1 | 0.5% |
| J86.9  | Pyothorax without fistula                                                         | 1 | 0.5% |
| J93.1  | Other spontaneous pneumothorax                                                    | 1 | 0.5% |
| J94.0  | Chylous effusion                                                                  | 1 | 0.5% |
| J96.0  | Acute respiratory failure                                                         | 1 | 0.5% |
| J96.1  | Chronic respiratory failure                                                       | 1 | 0.5% |
| K22.1  | Ulcer of oesophagus                                                               | 1 | 0.5% |
| K25.0  | Gastric ulcer : acute with haemorrhage                                            | 1 | 0.5% |
| K25.3  | Gastric ulcer : acute without haemorrhage or perforation                          | 1 | 0.5% |
| K26.1  | Duodenal ulcer : acute with perforation                                           | 1 | 0.5% |
| K35.1* | Acute appendicitis with peritoneal abscess                                        | 1 | 0.5% |
| K36    | Other appendicitis                                                                | 1 | 0.5% |
| K42.9  | Umbilical hernia without obstruction or gangrene                                  | 1 | 0.5% |
| K52.9  | Noninfective gastroenteritis and colitis, unspecified                             | 1 | 0.5% |
| K57.3  | Diverticular disease of large intestine without perforation or abscess            | 1 | 0.5% |
| K60.3  | Anal fistula                                                                      | 1 | 0.5% |
| K65.8  | Other peritonitis                                                                 | 1 | 0.5% |
| K66.1  | Haemoperitoneum                                                                   | 1 | 0.5% |
| K75.0  | Abscess of liver                                                                  | 1 | 0.5% |
| K80.3  | Calculus of bile duct with cholangitis                                            | 1 | 0.5% |
| K92.2  | Gastrointestinal haemorrhage, unspecified                                         | 1 | 0.5% |
| L03.1  | Cellulitis of other parts of limb                                                 | 1 | 0.5% |
| L03.9  | Cellulitis, unspecified                                                           | 1 | 0.5% |
| L04.3  | Acute lymphadenitis of lower limb                                                 | 1 | 0.5% |
| L08.0  | Pyoderma                                                                          | 1 | 0.5% |
| L20.8  | Other atopic dermatitis                                                           | 1 | 0.5% |
| L53.0  | Toxic erythema                                                                    | 1 | 0.5% |
| L56.3  | Solar urticaria                                                                   | 1 | 0.5% |

|       |                                                                      |   |      |
|-------|----------------------------------------------------------------------|---|------|
| L75.0 | Bromhidrosis                                                         | 1 | 0.5% |
| M16.9 | Coxarthrosis, unspecified                                            | 1 | 0.5% |
| M46.5 | Other infective spondylopathies                                      | 1 | 0.5% |
| M54.1 | Radiculopathy                                                        | 1 | 0.5% |
| M62.8 | Other specified disorders of muscle                                  | 1 | 0.5% |
| M87.9 | Osteonecrosis, unspecified                                           | 1 | 0.5% |
| M95.0 | Acquired deformity of nose                                           | 1 | 0.5% |
| N04.0 | Nephrotic syndrome : minor glomerular abnormality                    | 1 | 0.5% |
| N10   | Acute tubulo-interstitial nephritis                                  | 1 | 0.5% |
| N13.1 | Hydronephrosis with ureteral stricture, not elsewhere classified     | 1 | 0.5% |
| N15.1 | Renal and perinephric abscess                                        | 1 | 0.5% |
| N21.0 | Calculus in bladder                                                  | 1 | 0.5% |
| N25.8 | Other disorders resulting from impaired renal tubular function       | 1 | 0.5% |
| N40   | Hyperplasia of prostate                                              | 1 | 0.5% |
| N45.9 | Orchitis, epididymitis and epididymo-orchitis without abscess        | 1 | 0.5% |
| N70.0 | Acute salpingitis and oophoritis                                     | 1 | 0.5% |
| N87.2 | Severe cervical dysplasia, not elsewhere classified                  | 1 | 0.5% |
| O00.1 | Tubal pregnancy                                                      | 1 | 0.5% |
| O42.0 | Premature rupture of membranes, onset of labour within 24 hours      | 1 | 0.5% |
| O42.9 | Premature rupture of membranes, unspecified                          | 1 | 0.5% |
| O75.7 | Vaginal delivery following previous caesarean section                | 1 | 0.5% |
| O82.9 | Delivery by caesarean section, unspecified                           | 1 | 0.5% |
| Q27.3 | Peripheral arteriovenous malformation                                | 1 | 0.5% |
| R40.2 | Coma, unspecified                                                    | 1 | 0.5% |
| R56.8 | Other and unspecified convulsions                                    | 1 | 0.5% |
| R63.0 | Anorexia                                                             | 1 | 0.5% |
| S00.8 | Superficial injury of other parts of head                            | 1 | 0.5% |
| S32.0 | Fracture of lumbar vertebra                                          | 1 | 0.5% |
| S36.4 | Injury of small intestine                                            | 1 | 0.5% |
| S72.1 | Pertrochanteric fracture                                             | 1 | 0.5% |
| S82.0 | Fracture of patella                                                  | 1 | 0.5% |
| S83.2 | Tear of meniscus, current                                            | 1 | 0.5% |
| T07   | Unspecified multiple injuries                                        | 1 | 0.5% |
| T18.5 | Foreign body in anus and rectum                                      | 1 | 0.5% |
| T84.0 | Mechanical complication of internal joint prosthesis                 | 1 | 0.5% |
| T84.5 | Infection and inflammatory reaction due to internal joint prosthesis | 1 | 0.5% |
| Z21   | Asymptomatic human immunodeficiency virus [HIV] infection status     | 1 | 0.5% |
| S83.2 | Tear of meniscus, current                                            | 1 | 0.5% |
| T07   | Unspecified multiple injuries                                        | 1 | 0.5% |
| T18.5 | Foreign body in anus and rectum                                      | 1 | 0.5% |
| T84.0 | Mechanical complication of internal joint prosthesis                 | 1 | 0.5% |
| T84.5 | Infection and inflammatory reaction due to internal joint prosthesis | 1 | 0.5% |
| Z21   | Asymptomatic human immunodeficiency virus [HIV] infection status     | 1 | 0.5% |

Patients can have multiple records of hospital admissions during the study period.

\* indicates the code that does not exist in the ICD-10 (2016 version). For K35.9, N18.0, and K35.1, disease names are according to the ICD-10 (2008 version), and for I84.2 the disease name is according to the ICD-10 (2010 version).
