# Supplementary material for: Comorbidities and the use of comedications in people living with HIV on antiretroviral therapy in Japan: a cross-sectional study using a hospital claims database
Source: PubMed Central journal article supplement — BMJ Open. 2018 Jun 14;8(6):e019985. doi: 10.1136/bmjopen-2017-019985 (PMC6009456; doi:10.1136/bmjopen-2017-019985), 2018-06-14
Supplement: bmjopen-2017-019985supp002.pdf [file bmjopen-2017-019985supp002.pdf]

**Supplementary Table 2. Number of patients with each disease classified under the same comorbidity category (vascular diseases and psychiatric disorders)**

| Comorbidity                           | ICD-10 code | Total<br>(n=1445) |
|---------------------------------------|-------------|-------------------|
|                                       |             | n (%)             |
| Vascular diseases                     | -           | 55 (3.8)          |
| Hypertensive heart and renal diseases | I11, I13    | 1 (0.1)           |
| Angina pectoris                       | I20         | 55 (3.8)          |
| Myocardial infarction                 | I22         | 0 (0.0)           |
| Stroke                                | I64         | 0 (0.0)           |
| Psychiatric disorders                 | -           | 219 (15.2)        |
| Dementia                              | F01, F03    | 4 (0.3)           |
| Psychosis                             | F20–29      | 62 (4.3)          |
| Mania and depression                  | F30–32      | 121 (8.4)         |
| Anxiety                               | F40–41      | 78 (5.4)          |
| Insomnia                              | F51         | 17 (1.2)          |
