# Supplementary material for: Comorbidities and the use of comedications in people living with HIV on antiretroviral therapy in Japan: a cross-sectional study using a hospital claims database
Source: PubMed Central journal article supplement — BMJ Open. 2018 Jun 14;8(6):e019985. doi: 10.1136/bmjopen-2017-019985 (PMC6009456; doi:10.1136/bmjopen-2017-019985), 2018-06-14
Supplement: bmjopen-2017-019985supp003.pdf [file bmjopen-2017-019985supp003.pdf]

**Supplementary Table 3. Co-medications frequently used by patients with or without a hospital admission record during the study period**

| Patients with a record of hospital admission<br>(n=324) |                                                                                |          |     |       | Patients with no record of hospital admission<br>(n=1121) |                                                                                |          |     |       |
|---------------------------------------------------------|--------------------------------------------------------------------------------|----------|-----|-------|-----------------------------------------------------------|--------------------------------------------------------------------------------|----------|-----|-------|
| Rank                                                    | Drug subgroup name                                                             | ATC Code | n   | %     | Rank                                                      | Drug subgroup name                                                             | ATC Code | n   | %     |
| 1                                                       | Antacids, antilatulents and anti-ulcerants                                     | A02      | 178 | 54.9% | 1                                                         | Antacids, antilatulents and anti-ulcerants                                     | A02      | 280 | 25.0% |
| 2                                                       | Systemic antibacterials                                                        | J01      | 137 | 42.3% | 2                                                         | Psycholeptics                                                                  | N05      | 223 | 19.9% |
| 3                                                       | Psycholeptics                                                                  | N05      | 95  | 29.3% | 3                                                         | Systemic antihistamines                                                        | R06      | 203 | 18.1% |
| 4                                                       | Anti-inflammatory and anti-rheumatic products                                  | M01      | 69  | 21.3% | 4                                                         | Lipid-regulating/anti-atheroma preparations                                    | C10      | 185 | 16.5% |
| 5                                                       | Systemic antihistamines                                                        | R06      | 65  | 20.1% | 5                                                         | Systemic antibacterials                                                        | J01      | 184 | 16.4% |
| 6                                                       | Lipid-regulating/anti-atheroma preparations                                    | C10      | 64  | 19.8% | 6                                                         | Anti-inflammatory and anti-rheumatic products                                  | M01      | 155 | 13.8% |
| 7                                                       | Antithrombotic agents                                                          | B01      | 58  | 17.9% | 7                                                         | Antidiarrhoeals, oral electrolyte replacers and intestinal anti-inflammatories | A07      | 120 | 10.7% |
| 8                                                       | Agents acting on the renin-angiotensin system                                  | C09      | 56  | 17.3% | 8                                                         | Agents acting on the renin-angiotensin system                                  | C09      | 104 | 9.3%  |
| 9                                                       | Antidiarrhoeals, oral electrolyte replacers and intestinal anti-inflammatories | A07      | 55  | 17.0% | 9                                                         | Vitamins                                                                       | A11      | 93  | 8.3%  |
| 10                                                      | Vitamins                                                                       | A11      | 55  | 17.0% | 10                                                        | Cough and cold preparations                                                    | R05      | 91  | 8.1%  |
| 11                                                      | Analgesics                                                                     | N02      | 54  | 16.7% | 11                                                        | Calcium antagonists                                                            | C08      | 80  | 7.1%  |
| 12                                                      | Systemic agents for fungal infections                                          | J02      | 53  | 16.4% | 12                                                        | Anti-gout preparations                                                         | M04      | 74  | 6.6%  |
| 13                                                      | Cough and cold preparations                                                    | R05      | 47  | 14.5% | 13                                                        | All other therapeutic products                                                 | V03      | 53  | 4.7%  |
| 14                                                      | Calcium antagonists                                                            | C08      | 45  | 13.9% | 14                                                        | Functional gastro-intestinal disorder drugs                                    | A03      | 53  | 4.7%  |
| 15                                                      | Systemic corticosteroids                                                       | H02      | 44  | 13.6% | 15                                                        | Cholagogues and hepatic protectors                                             | A05      | 53  | 4.7%  |
| 16                                                      | All other therapeutic products                                                 | V03      | 43  | 13.3% | 16                                                        | Analgesics                                                                     | N02      | 52  | 4.6%  |
| 17                                                      | Intravenous solutions                                                          | K01      | 39  | 12.0% | 17                                                        | Drugs used in diabetes                                                         | A10      | 49  | 4.4%  |
| 18                                                      | Functional gastro-intestinal disorder drugs                                    | A03      | 38  | 11.7% | 18                                                        | Psychoanaesthetics excluding anti-obesity preparations                         | N06      | 44  | 3.9%  |
| 19                                                      | Antivirals for systemic use                                                    | J05      | 38  | 11.7% | 19                                                        | Antithrombotic agents                                                          | B01      | 40  | 3.6%  |
| 20                                                      | Anti-gout preparations                                                         | M04      | 38  | 11.7% | 20                                                        | Anti-epileptics                                                                | N03      | 37  | 3.3%  |
| 21                                                      | Anti-epileptics                                                                | N03      | 38  | 11.7% | 21                                                        | Anti-asthma and copd products                                                  | R03      | 35  | 3.1%  |
| 22                                                      | Drugs used in diabetes                                                         | A10      | 35  | 10.8% | 22                                                        | Anti-anaemic preparations                                                      | B03      | 32  | 2.9%  |
| 23                                                      | Antiprotozoals and anthelmintics                                               | P01      | 33  | 10.2% | 23                                                        | Antiprotozoals and anthelmintics                                               | P01      | 27  | 2.4%  |
| 24                                                      | Cholagogues and hepatic protectors                                             | A05      | 30  | 9.3%  | 24                                                        | Systemic agents for fungal infections                                          | J02      | 25  | 2.2%  |
| 25                                                      | Drugs for constipation and bowel cleansers                                     | A06      | 29  | 9.0%  | 25                                                        | Drugs for constipation and bowel cleansers                                     | A06      | 24  | 2.1%  |
| 26                                                      | Psychoanaesthetics excluding anti-obesity preparations                         | N06      | 26  | 8.0%  | 26                                                        | Systemic corticosteroids                                                       | H02      | 22  | 2.0%  |
| 27                                                      | Diuretics                                                                      | C03      | 24  | 7.4%  | 27                                                        | Antivirals for systemic use                                                    | J05      | 22  | 2.0%  |
| 28                                                      | Anti-asthma and copd products                                                  | R03      | 19  | 5.9%  | 28                                                        | Beta-blocking agents                                                           | C07      | 22  | 2.0%  |
| 29                                                      | Blood coagulation system, other products                                       | B02      | 18  | 5.6%  | 29                                                        | Urologicals                                                                    | G04      | 21  | 1.9%  |
| 30                                                      | Anti-anaemic preparations                                                      | B03      | 18  | 5.6%  | 30                                                        | Diuretics                                                                      | C03      | 18  | 1.6%  |
| 31                                                      | Beta-blocking agents                                                           | C07      | 15  | 4.6%  | 31                                                        | Other cns drugs                                                                | N07      | 18  | 1.6%  |
| 32                                                      | Urologicals                                                                    | G04      | 15  | 4.6%  | 32                                                        | Muscle relaxants                                                               | M03      | 17  | 1.5%  |
| 33                                                      | Antimycobacterials                                                             | J04      | 14  | 4.3%  | 33                                                        | Thyroid therapy                                                                | H03      | 14  | 1.2%  |
| 34                                                      | Dietetic agents                                                                | V06      | 14  | 4.3%  | 34                                                        | Cardiac therapy                                                                | C01      | 11  | 1.0%  |
| 35                                                      | Other cns drugs                                                                | N07      | 13  | 4.0%  | 35                                                        | Blood coagulation system, other products                                       | B02      | 10  | 0.9%  |
| 36                                                      | Cardiac therapy                                                                | C01      | 12  | 3.7%  | 36                                                        | Antimycobacterials                                                             | J04      | 10  | 0.9%  |
| 37                                                      | All other non-therapeutic products                                             | V07      | 12  | 3.7%  | 37                                                        | Other drugs for disorders of the musculo-skeletal system                       | M05      | 10  | 0.9%  |
| 38                                                      | Mineral supplements                                                            | A12      | 8   | 2.5%  | 38                                                        | Antihypertensives                                                              | C02      | 8   | 0.7%  |
| 39                                                      | Injection solutions/infusion additives (<100ml)                                | K04      | 7   | 2.2%  | 39                                                        | Dietetic agents                                                                | V06      | 6   | 0.5%  |
| 40                                                      | Muscle relaxants                                                               | M03      | 7   | 2.2%  | 40                                                        | Other dermatological preparations                                              | D11      | 6   | 0.5%  |
| 41                                                      | Antihypertensives                                                              | C02      | 6   | 1.9%  | 41                                                        | Digestives, including digestive enzymes                                        | A09      | 5   | 0.4%  |
| 42                                                      | Other drugs for disorders of the musculo-skeletal system                       | M05      | 6   | 1.9%  | 42                                                        | Mineral supplements                                                            | A12      | 4   | 0.4%  |
| 43                                                      | Immunostimulating agents                                                       | L03      | 5   | 1.5%  | 43                                                        | Other cardiovascular products                                                  | C06      | 3   | 0.3%  |
| 44                                                      | Other cardiovascular products                                                  | C06      | 4   | 1.2%  | 44                                                        | Antifungals, dermatological                                                    | D01      | 3   | 0.3%  |
| 45                                                      | Antifungals, dermatological                                                    | D01      | 4   | 1.2%  | 45                                                        | Anti-parkinson drugs                                                           | N04      | 3   | 0.3%  |
| 46                                                      | Thyroid therapy                                                                | H03      | 4   | 1.2%  | 46                                                        | Cerebral and peripheral vasotherapeutics                                       | C04      | 3   | 0.3%  |
| 47                                                      | Other hormones                                                                 | H04      | 4   | 1.2%  | 47                                                        | Intravenous solutions                                                          | K01      | 2   | 0.2%  |
| 48                                                      | Anaesthetics                                                                   | N01      | 4   | 1.2%  | 48                                                        | Topical corticosteroids                                                        | D07      | 2   | 0.2%  |
| 49                                                      | Anti-parkinson drugs                                                           | N04      | 4   | 1.2%  | 49                                                        | Other alimentary tract and metabolism products                                 | A16      | 2   | 0.2%  |
| 50                                                      | Digestives, including digestive enzymes                                        | A09      | 3   | 0.9%  | 50                                                        | Cytostatic hormone therapy                                                     | L02      | 2   | 0.2%  |
| 51                                                      | Antiemetics and antinauseants                                                  | A04      | 2   | 0.6%  | 51                                                        | Topical anti-rheumatics                                                        | M02      | 1   | 0.1%  |
| 52                                                      | Cerebral and peripheral vasotherapeutics                                       | C04      | 2   | 0.6%  | 52                                                        | Antivaricosis/anti-haemorrhoidal preparations                                  | C05      | 1   | 0.1%  |
| 53                                                      | Topical corticosteroids                                                        | D07      | 2   | 0.6%  | 53                                                        | Immunosuppressants                                                             | L04      | 1   | 0.1%  |
| 54                                                      | Gynaecological anti-infectives                                                 | G01      | 2   | 0.6%  | 54                                                        | Cardiovascular multitherapy combination products                               | C11      | 1   | 0.1%  |
| 55                                                      | Topical anti-rheumatics                                                        | M02      | 2   | 0.6%  | 55                                                        | Emollients, protectives                                                        | D02      | 1   | 0.1%  |
| 56                                                      | Stomatologicals, mouth preparations, medicinal dentifrices etc                 | A01      | 1   | 0.3%  | 56                                                        | Nonsteroidal products for inflammatory skin disorders                          | D05      | 1   | 0.1%  |
| 57                                                      | Anabolics, systemic                                                            | A14      | 1   | 0.3%  | 57                                                        | Anti-acne preparations                                                         | D10      | 1   | 0.1%  |
| 58                                                      | Antivaricosis/anti-haemorrhoidal preparations                                  | C05      | 1   | 0.3%  | 58                                                        | Sex hormones and products with similar desired effects, systemic action only   | G03      | 1   | 0.1%  |
| 59                                                      | Antiseptics and disinfectants                                                  | D08      | 1   | 0.3%  | 59                                                        | Ophthalmologicals                                                              | S01      | 1   | 0.1%  |
| 60                                                      | Antineoplastics                                                                | L01      | 1   | 0.3%  | -                                                         | -                                                                              | -        | -   | -     |
| 61                                                      | Immunosuppressants                                                             | L04      | 1   | 0.3%  | -                                                         | -                                                                              | -        | -   | -     |

Co-medications prescribed for use for ≥30 days total during the study period, regardless of whether they are inpatient/outpatient prescriptions, are listed.

Co-medications were classified based on the therapeutic subgroups (2nd level) of ATC codes.

Gray-shaded cells indicate the class of hospital solutions (categorized under "K" in EphMRA ATC).
